# Supplementary material for: Design and Optimization of Thioglycosyl–naphthalimides as Efficient Inhibitors Against Human O-GlcNAcase
Source: Front Chem. 2019 Jul 25;7:533. doi: 10.3389/fchem.2019.00533 (PMC6669961; doi:10.3389/fchem.2019.00533)

**Design and Optimization of thioglycosyl−naphthalimides as efficient inhibitors against Human O‑GlcNAcase**

Shengqiang Shen,†,# Lili Dong,†,# Wei Chen,‡ Renjie Wu,† Huizhe Lu,† Qing Yang,*,‡ and

Jianjun Zhang*,†

†Department of Applied Chemistry, College of Science, China Agricultural University, Beijing, China

‡Institute of Plant Protection, Chinese Academy of Agricultural Sciences, Beijing 100193, China

**Contents**

[1. Synthetic procedures and characterization of compounds 3](#_Toc1541)

[1.1. Synthesis of thioglycosyl−naphthalimides 10a-10d 3](#_Toc10345)

[1.2. Synthesis of thioglycosyl−naphthalimides 16a-16o. 8](#_Toc22019)

[1.3. New method for the synthesis of thioglycosyl−naphthalimides 16h. 21](#_Toc31375)

[1.4. Synthesis of ureido glycosides 17a-17d. 22](#_Toc460)

[2. The supplementary MD simulations studies. 23](#_Toc22179)

[References 25](#_Toc31972)

[1H NMR and 13C NMR spectrum 26](#_Toc11907)

1. **Synthetic procedures and characterization of compounds**

**1.1. Synthesis of thioglycosyl−naphthalimides 10a-10d**

**10a**: R1=Br; **10b**: R1=OCH3; **10c**: R1=N(CH3)2; **10d**: R1=piperidyl

**Scheme S1.** Synthesis of thioglycosyl−naphthalimides **10a-10d**. (i) *tert*-butyl (3-aminopropyl) carbamate, EtOH; (ii) DCM, CF3COOH; (iii) 2-chloroacetyl chloride, Et3N, DCM; (iv) AcCl; (v) thiourea, acetone; (vi) Na2S2O5, DCM, H2O; (vii) K2CO3, acetone, H2O; (viii) CH3NH2, MeOH.

Compounds **5a-5d** were synthesized as described previously.1

2-(3-aminopropyl)-6-bromo-1*H*-benzo[*de*]isoquinoline-1,3(2*H*)-dione (**5a**): light yellow solid; (2.6 g, 79.1%) yield; 1H NMR (300 MHz, DMSO-*d*6) δ 8.52 –8.48 (m, 2H, ArH), 8.23 (d, *J* = 8.3 Hz, 1H, ArH), 8.16 (dd, *J* = 8.1, 7.6 Hz, 1H, ArH), 7.99 (d, *J* = 8.5 Hz, 1H, ArH), 4.07 (t, *J* = 6.8 Hz, 2H, CH2), 2.61 (t, *J* = 6.8 Hz, 2H, CH2), 2.03–1.93 (m, 2H, CH2).

2-(3-aminopropyl)-6-methoxy-1H-benzo[de]isoquinoline-1,3(2H)-dione (**5b**): light yellow solid; 1H NMR (300 MHz, DMSO-d6) δ 8.41 (dd, *J* = 7.8, 3.2 Hz, 2H, ArH), 8.35 (d, *J* = 8.3 Hz, 1H, ArH), 7.74 (dd, *J* = 8.1, 7.6 Hz, 1H, ArH), 7.24 (d, *J* = 8.5 Hz, 1H, ArH), 4.19 – 4.00 (m, 5H, OCH3, CH2), 2.82 (dd, *J* = 9.0, 6.8 Hz, 2H, CH2), 2.04 – 1.94 (m, 2H, CH2).

2-(3-aminopropyl)-6-(dimethylamino)-1*H*-benzo[*de*]isoquinoline-1,3(2*H*)-dione (**5c**): yellow solid; 1H NMR (300 MHz, CDCl3) δ 8.57 (d, J = 8.2 Hz, 1H, ArH), 8.49 – 8.41 (m, 2H, ArH), 7.70 (dd, *J* = 8.2, 7.5 Hz, 1H, ArH), 7.13 (d, J = 8.2 Hz, 1H, ArH), 4.30 (t, *J* = 6.9 Hz, 2H, CH2), 2.79 – 2.73 (m, 2H, CH2), 2.34 (s, 6H, 2 CH3), 1.99 – 1.85 (m, 2H, CH2).

2-(3-aminopropyl)-6-(piperidin-1-yl)-1*H*-benzo[*de*]isoquinoline-1,3(2*H*)-dione (**5d**): yellow solid; 1H NMR (300 MHz, CDCl3) δ 8.55 (dd, *J* = 7.3, 1.1 Hz, 1H, ArH), 8.46 (d, *J* = 8.1 Hz, 1H, ArH), 8.37 (dd, *J* = 8.4, 1.1 Hz, 1H, ArH), 7.65 (dd, *J* = 8.4, 7.4 Hz, 1H, ArH), 7.16 (d, *J* = 8.2 Hz, 1H, ArH), 4.31 (t, *J* = 5.6 Hz, 2H, CH2), 3.27 – 3.14 (m, 4H, 2 CH2), 2.82 – 2.73 (m, 2H, CH2), 2.08 – 1.81 (m, 6H, 3 CH2), 1.79 – 1.61 (m, 2H, CH2).

A solution of **5a-5d** (5 mmol, 1 eq) in dry DCM (50 mL) was mixed with Et3N (1.5 mL,7.5 mmol) at 0 ℃, then 2-chloroacetyl chloride (0.6 mL, 6 mmol) in dry DCM (10 mL) was added dropwise under N2. The mixture was further stirred for 3 h at room temperature, and the completion of the reaction was confirmed by TLC (petroleum ether/EtOAc, 3:1 v/v) analysis. After the reaction mixture was concentrated *in vacuo*, **6a-6d** were prepared by flash column chromatography (petroleum ether/EtOAc, 6:1 v/v).

*N*-(3-(6-bromo-1,3-dioxo-1*H*-benzo[*de*]isoquinolin-2(3*H*)-yl)propyl)-2-chloroacetamide (**6a**): light yellow solid; (1.8 g, 87.9 %) yield; 1H NMR (300 MHz, CDCl3) δ 8.67 (d, *J* = 7.3 Hz, 1H, ArH), 8.58 (dd, *J* = 8.5, 0.8 Hz, 1H, ArH), 8.42 (d, *J* = 7.9 Hz, 1H, ArH), 8.05 (d, *J* = 7.9 Hz, 1H, ArH), 7.86 (dd, *J* = 8.4, 7.5 Hz, 1H, ArH), 7.50 (br s, 1H, NH), 4.27 (t, *J* = 6.3 Hz, 2H, ArCH2), 4.10 (s, 2H, ClCH2), 3.34 (dd, *J* = 12.3, 6.2 Hz, 2H, CH2), 2.10 – 1.93 (m, 2H, CH2); 13C NMR (75 MHz, CDCl3) δ 165.13, 163.03, 132.59, 131.34, 130.50, 130.18, 129.66, 127.99, 127.14, 121.74, 120.85, 41.76, 36.56, 35.57, 26.86.

2-chloro-*N*-(3-(6-methoxy-1,3-dioxo-1*H*-benzo[*de*]isoquinolin-2(3*H*)-yl)propyl)acetamide (**6b**): light yellow solid; (1.5 g, 83.1 %) yield; 1H NMR (300 MHz, DMSO-*d*6) δ 8.59 – 8.38 (m, 3H, ArH), 8.24 (t, J = 5.2 Hz, 1H, NH), 7.85 – 7.74 (m, 1H, ArH), 7.30 (d, *J* = 8.4 Hz, 1H, ArH), 4.11 (s, 3H, OCH3), 4.09 – 3.95 (m, 4H, ArCH2, ClCH2), 3.21 – 3.06 (m, 2H, CH2), 1.84 – 1.70 (m, 2H, CH2); 13C NMR (75 MHz, DMSO-*d*6) δ 163.71, 162.87, 160.32, 132.88, 130.91, 128.52, 127.90, 125.94, 122.76, 121.97, 114.32, 106.21, 56.53, 41.80, 37.15, 35.94, 27.27.

2-chloro-*N*-(3-(6-(dimethylamino)-1,3-dioxo-1*H*-benzo[*de*]isoquinolin-2(3*H*)-yl)propyl)acetamide (**6c**): yellow solid; (1.6 g, 85.6 %) yield; 1H NMR (300 MHz, CDCl3) δ 8.67 – 8.41 (m, 3H, ArH), 7.72 (d, *J* = 8.2 Hz, 1H, ArH), 7.57 (s, 1H, NH), 7.13 (d, J = 8.2 Hz, 1H, ArH), 4.29 (t, *J* = 6.7 Hz, 2H, ArCH2), 4.11 (s, 2H, ClCH2), 3.39 – 3.28 (m, 2H, CH2), 2.33 (s, 6H, 2 CH3), 1.98 – 1.80 (m, 2H, CH2); 13C NMR (75 MHz, DMSO-*d*6) δ 163.51, 163.04, 156.52, 132.05, 131.29, 130.37, 129.40, 124.91, 124.15, 122.18, 113.22, 112.70, 44.31, 42.01, 37.13, 35.88, 27.07.

2-chloro-*N*-(3-(1,3-dioxo-6-(piperidin-1-yl)-1*H*-benzo[*de*]isoquinolin-2(3*H*)-yl)propyl)acetamide (**6d**): yellow solid; (1.7 g, 82.1 %) yield; 1H NMR (300 MHz, DMSO-*d*6) δ 8.70 – 8.47 (m, 2H, ArH), 8.40 (d, *J* = 8.5, 1H, NH), 7.78 – 7.62 (m, 2H, ArH, NH), 7.18 (d, *J* = 8.2 Hz, 1H, ArH), 4.18 – 4.05 (m, 4H, ArCH2, ClCH2), 3.38 – 3.29 (m, 2H, CH2), 3.28 – 3.19 (m, 4H, 2 CH2), 2.02 – 1.94 (m, 2H, CH2), 1.93 – 1.84 (m, 4H, 2 CH2), 1.79 – 1.69 (m, 2H, CH2); 13C NMR (75 MHz, DMSO-*d*6) δ 163.81, 163.21, 156.71, 132.36, 130.67, 129.34, 125.90, 125.55, 122.70, 120.82, 115.13, 115.01, 54.09, 41.79, 36.90, 35.64, 27.14, 25.83, 23.96.

2-acetamido-3,4,6-tri-O-acetyl-2-deoxy-1-thio-β-D-glucopyranose (**8**) was synthesized from N-acetyl-D-glucosamine as described previously.2 White solid; (65.2 % over three steps) yield; [α]D25 -15.1 (c=1.0,CHCl3); 1H NMR (300 MHz, CDCl3) δ 5.78 (d, *J* = 9.5 Hz, 1H, NH), 5.20 – 5.03 (m, 2H, H-3, H-4), 4.60 (d, *J* = 9.9 Hz, 1H, H-1), 4.25 (dd, *J* = 12.4, 4.8 Hz, 1H, H-6b), 4.19 – 4.05 (m, 2H, H-6a, H-2), 3.70 (ddd, *J* = 9.8, 4.7, 2.2 Hz, 1H, H-5), 2.57 (s, 1H, SH), 2.10 (s, 3H, OAc), 2.05 (s, 3H, OAc), 2.03 (s, 3H, OAc), 1.99 (s, 3H, NAc).

A solution of **6a-6d** (2 mmol, 1.0 eq) in acetone (60 mL) and H2O (30 mL) was mixed with solid potassium carbonate (2.4 mmol, 1.2 eq), then **8** (2 mmol, 1 eq) was added. The mixture was stirred for 5 h at room temperature until TLC (petroleum ether/EtOAc, 1:2 v/v) indicated that the reaction was complete. After the solution was concentrated *in vacuo*, the residue was diluted with DCM (80 mL), washed with H2O (100 mL), brine (100 mL), dried over Na2SO4, and concentrated. Finally, the residue was purified by flash column chromatography (petroleum ether/EtOAc, 2:1 v/v) to obtain **9a-9d**.

*N*-[3-(6-bromo-1,3-dioxo-1*H*-benzo[*de*]isoquinolin-2(3*H*)-yl)propyl]-2-[(2-acetamido-3,4,6- tri-O-acetyl-β-D-glucopyranosyl)thio]acetamide (**9a**): light yellow solid; (1.2 g, 81.6 %) yield; [α]D25 -100.5 (c=1, DMSO); 1H NMR (300 MHz, DMSO-*d*6) δ 8.51 (ddd, *J* = 9.4, 7.9, 0.9 Hz, 2H, ArH), 8.29 (d, *J* = 7.9 Hz, 1H, ArH), 8.17 (d, *J* = 7.9 Hz, 1H, ArH), 8.07 – 7.91 (m, 3H, 2 NH, ArH), 5.11 (t, *J* = 9.7 Hz, 1H, H-3), 4.90 (t, *J* = 9.7 Hz, 1H, H-4), 4.80 (d, *J* = 10.4 Hz, 1H, H-1), 4.18 (dd, *J* = 12.3, 4.8 Hz, 1H, H-6b), 4.09 – 3.99 (m, 3H, CH2Ar, H-6a), 3.99 – 3.91 (m, 1H, H-2), 3.90 – 3.80 (m, 1H, H-5), 3.34 – 3.21 (m, 2H, SCH2), 3.16 (dd, *J* = 13.1, 6.4 Hz, 2H, CH2), 1.99, 1.97 (2 s, 6H, 2 OAc), 1.93 (s, 3H, OAc), 1.86 – 1.72 (m, 5H, NAc, CH2); 13C NMR (75 MHz, DMSO-*d*6) δ 170.13, 169.73, 169.37, 168.37, 163.05, 163.00, 132.69, 131.67, 131.42, 131.05, 129.87, 129.22, 128.85, 128.39, 122.86, 122.08, 83.00, 74.80, 73.68, 68.67, 62.08, 52.17, 38.05, 37.01, 32.88, 27.87, 22.73, 20.56, 20.52, 20.45; HRMS (ESI) calcd for C31H35BrN3O11S (M+H+) 736.1176, found 736.1169.

*N*-[3-(6-methoxy-1,3-dioxo-1*H*-benzo[*de*]isoquinolin-2(3*H*)-yl)propyl]-2-[(2-acetamido-3,4,6- tri-O-acetyl-β-D-glucopyranosyl)thio]acetamide (**9b**): light yellow solid; (1.2 g, 87.5 %) yield; [α]D25 -91.3 (c=1, DMSO); 1H NMR (300 MHz, DMSO-*d*6) δ 8.47 – 8.29 (m, 3H, ArH), 8.07 – 7.89 (m, 2H, 2 NH), 7.76 – 7.68 (m, 1H, ArH), 7.22 (d, *J* = 8.5 Hz, 1H, ArH), 5.09 (t, *J* = 9.7 Hz, 1H, H-3), 4.87 (t, *J* = 9.7 Hz, 1H, H-4), 4.77 (d, *J* = 10.4 Hz, 1H, H-1), 4.15 (dd, *J* = 12.3, 4.7 Hz, 1H, H-6b), 4.08 (s, 3H, OCH3), 4.03 – 3.95 (m, 3H, CH2Ar, H-6a), 3.94 – 3.88 (m, 1H, H-2), 3.85 – 3.78 (m, 1H, H-5), 3.32 – 3.17 (m, 2H, SCH2), 3.16 – 3.03 (m, 2H, CH2), 1.96 (s, 3H, OAc), 1.94 (s, 3H, OAc), 1.90 (s, 3H, OAc), 1.79 – 1.69 (m, 5H, NAc, CH2); 13C NMR (75 MHz, DMSO-*d*6) δ 170.14, 169.73, 169.40, 169.38, 168.36, 163.72, 163.07, 160.42, 133.34, 131.09, 128.59, 128.30, 126.37, 122.78, 121.90, 114.26, 106.27, 83.00, 74.82, 73.70, 68.68, 62.06, 56.71, 52.20, 37.70, 37.03, 32.88, 28.03, 22.72, 20.54, 20.50, 20.44; HRMS (ESI) calcd for C32H38N3O12S (M+H+) 688.2176, found 688.2162.

*N*-[3-(6-dimethylamino-1,3-dioxo-1*H*-benzo[*de*]isoquinolin-2(3*H*)-yl)propyl]-2-[(2-acetamido-3,4,6- tri-O-acetyl-β-D-glucopyranosyl)thio]acetamide (**9c**): yellow solid; (1.3 g, 92.8 %) yield; [α]D25 -103.8 (c=1, DMSO); 1H NMR (300 MHz, DMSO-*d*6) δ 8.46 – 8.33 (m, 2H, ArH), 8.24 (d, *J* = 8.3 Hz, 1H, ArH), 8.07 – 7.87 (m, 2H, 2 NH), 7.66 (dd, *J* = 8.3, 7.5 Hz, 1H, ArH), 7.10 (d, *J* = 8.4 Hz, 1H, ArH), 5.10 (t, *J* = 9.7 Hz, 1H, H-3), 4.87 (t, *J* = 9.7 Hz, 1H, H-4), 4.78 (d, *J* = 10.4 Hz, 1H, H-1), 4.16 (dd, *J* = 12.3, 4.8 Hz, 1H, H-6b), 4.04 – 3.96 (m, 3H, CH2Ar, H-6a), 3.94 – 3.87 (m, 1H, H-2), 3.85 – 3.76 (m, 1H, H-5), 3.34 – 3.18 (m, 2H, SCH2), 3.11 (dd, *J* = 13.2, 6.6 Hz, 2H, CH2), 3.04 (s, 6H, 2 NCH3), 1.96 (s, 3H, OAc), 1.94 (s, 3H, OAc), 1.90 (s, 3H, OAc), 1.79 – 1.69 (m, 5H, CH2, NAc); 13C NMR (75 MHz, DMSO-*d*6) δ 170.13, 169.74, 169.41, 169.38, 168.35, 163.77, 163.11, 156.62, 132.36, 131.56, 130.62, 129.66, 124.96, 124.23, 122.31, 113.30, 112.96, 83.00, 74.83, 73.71, 68.67, 62.05, 52.21, 44.45, 37.56, 37.01, 32.88, 28.06, 22.71, 20.53, 20.49, 20.43; HRMS (ESI) calcd for C33H41N4O11S (M+H+) 701.2493, found 701.2497.

*N*-[3-[6-(piperidin-1-yl)-1,3-dioxo-1*H*-benzo[*de*]isoquinolin-2(3*H*)-yl]propyl]-2-[(2-acetamido-3,4,6- tri-O-acetyl-β-D-glucopyranosyl)thio]acetamide (**9d**): yellow solid; (1.2 g, 81.1 %) yield; [α]D25 -107.1 (c=1, DMSO); 1H NMR (300 MHz, DMSO-*d*6) δ 8.53 – 8.44 (m, 1H, ArH), 8.43 – 8.34 (m, 2H, ArH), 8.07 – 7.91 (m, 2H, 2 NH), 7.80 (dd, *J* = 8.4, 7.4 Hz, 1H, ArH), 7.30 (d, *J* = 8.2 Hz, 1H, ArH), 5.10 (t, *J* = 9.7 Hz, 1H, H-3), 4.88 (t, *J* = 9.7 Hz, 1H, H-4), 4.79 (d, *J* = 10.4 Hz, 1H, H-1), 4.17 (dd, *J* = 12.3, 4.8 Hz, 1H, H-6b), 4.09 – 3.98 (m, 3H, CH2Ar, H-6a), 3.97 – 3.87 (m, 1H, H-2), 3.87 – 3.78 (m, 1H, H-5), 3.33 – 3.23 (m, 2H, SCH2), 3.23 – 3.08 (m, 6H, 3 CH2), 1.98 (s, 3H, OAc), 1.97 (s, 3H, OAc), 1.92 (s, 3H, OAc), 1.89 – 1.77 (m, 6H, 3 CH2), 1.77 (s, 3H, NAc), 1.72 – 1.59 (m, 2H, CH2); 13C NMR (75 MHz, DMSO-*d*6) δ 170.13, 169.72, 169.37, 168.32, 163.80, 163.25, 156.89, 132.44, 130.75, 129.34, 125.93, 125.58, 122.65, 115.12, 115.03, 82.99, 74.81, 73.70, 68.67, 62.06, 54.10, 52.19, 37.65, 37.00, 32.87, 28.05, 25.84, 23.97, 22.73, 20.56, 20.52, 20.45; HRMS (ESI) calcd for C36H45N4O11S (M+H+) 741.2806, found 741.2818.

A solution of **9a-9d** (1.0 mmol) was suspended in anhydrous MeOH (15 mL), and saturated solution of CH3NH2 in MeOH (10 mL) was then added. The reaction was stirred for 48 h at room temperature, until TLC (EtOAc/MeOH/H2O, 8:1:1 v/v/v) indicated that the reaction was complete. The mixture was concentrated *in vacuo* and recrystallized from MeOH/ether to obtain **10a-10d**.

*N*-[3-(6-bromo-1,3-dioxo-1*H*-benzo[*de*]isoquinolin-2(3*H*)-yl)propyl]-2-[(2-acetamido-β-D-glucopyranosyl)thio]acetamide (**10a**): yellow solid; (0.51 g, 83.6 %) yield; [α]D25 -30.1 (c=0.2, DMSO); 1H NMR (300 MHz, DMSO-*d*6) δ 8.52 – 8.37 (m, 2H, ArH), 8.22 (d, *J* = 7.9 Hz, 1H, ArH), 8.11 (d, *J* = 7.9 Hz, 1H, ArH), 7.98 – 7.87 (m, 2H, ArH, NH), 7.79 (d, *J* = 9.3 Hz, 1H, NH), 4.49 (d, *J* = 10.3 Hz, 1H, H-1), 4.03 (t, *J* = 7.1 Hz, 2H, H-3, H-4), 3.72 (d, *J* = 11.0 Hz, 1H, H-6b), 3.58 (dd, *J* = 19.6, 9.8 Hz, 1H, H-2), 3.47 (dd, *J* = 11.6, 5.4 Hz, 1H, H-6a), 3.42-3.22 (m, 3H, H-5, SCH2), 3.21 – 3.12 (m, 4H, 2 CH2), 1.88 – 1.73 (m, 5H, NAc, CH2); 13C NMR (75 MHz, DMSO-*d*6) δ 169.32, 169.10, 162.94, 162.88, 132.59, 131.59, 131.34, 130.96, 129.74, 129.19, 128.77, 128.22, 122.70, 121.92, 83.83, 81.25, 75.45, 70.70, 61.44, 54.59, 38.06, 37.08, 33.14, 27.91, 23.13; HRMS (ESI) calcd for C25H29BrN3O8S (M+H+) 610.0859, found 610.0842.

*N*-[3-(6-methoxy-1,3-dioxo-1*H*-benzo[*de*]isoquinolin-2(3*H*)-yl)propyl]-2-[(2-acetamido-β-D-glucopyranosyl)thio]acetamide (**10b**): yellow solid; (0.50 g, 89.3 %) yield; [α]D25 -47.3 (c=0.2, DMSO); 1H NMR (300 MHz, DMSO-*d*6) δ 8.38 – 8.32 (m, 2H, ArH), 8.29 (d, *J* = 8.3 Hz, 1H, ArH), 7.90 (t, *J* = 5.7 Hz, 1H, NH), 7.82 – 7.60 (m, 2H, ArH), 7.17 (d, *J* = 8.5 Hz, 1H, NH), 5.05 (d, *J* = 4.6 Hz, 1H, OH), 5.01 (d, *J* = 5.3 Hz, 1H, OH), 4.56 (t, *J* = 5.7 Hz, 1H, OH), 4.45 (d, *J* = 10.3 Hz, 1H, H-1), 4.06 (s, 3H, OCH3), 3.98 (t, *J* = 7.1 Hz, 2H, H-3, H-4), 3.69 (dd, *J* = 11.0, 6.1 Hz, 1H, H-6b), 3.54 (dd, *J* = 19.6, 9.7 Hz, 1H, H-2), 3.44 (dd, *J* = 11.4, 5.6 Hz, 1H, H-6a), 3.34 – 3.15 (m, 3H, H-5, SCH2), 3.15 – 3.04 (m, 4H, 2 CH2), 1.78 (s, 3H, NAc), 1.77 – 1.68 (m, 2H, CH2); 13C NMR (75 MHz, DMSO-*d*6) δ 169.35, 169.08, 163.64, 162.99, 160.34, 133.27, 131.01, 128.48, 128.23, 126.30, 122.69, 121.78, 114.15, 106.21, 83.79, 81.24, 75.46, 70.70, 61.44, 56.68, 54.60, 37.70, 37.10, 33.10, 28.08, 23.11; HRMS (ESI) calcd for C26H32N3O9S (M+H+) 562.1859, found 562.1849.

*N*-[3-(6-dimethylamino-1,3-dioxo-1*H*-benzo[*de*]isoquinolin-2(3*H*)-yl)propyl]-2-[(2-acetamido-β-D-glucopyranosyl)thio]acetamide (**10c**): yellow solid; (0.49 g, 87.5 %) yield; [α]D25 -39.8 (c=0.2, DMSO); 1H NMR (300 MHz, DMSO-*d*6) δ 8.49 – 8.31 (m, 2H, ArH), 8.23 (d, *J* = 8.3 Hz, 1H, ArH), 7.89 (t, *J* = 5.7 Hz, 1H, NH), 7.75 (d, *J* = 9.3 Hz, 1H, ArH), 7.66 (dd, *J* = 8.4, 7.4 Hz, 1H, ArH, NH), 7.10 (d, *J* = 8.4 Hz, 1H, ArH), 5.05 (d, *J* = 4.7 Hz, 1H, OH), 5.01 (d, *J* = 5.3 Hz, 1H, OH), 4.57 (t, *J* = 5.7 Hz, 1H, OH), 4.45 (d, *J* = 10.3 Hz, 1H, H-1), 3.98 (t, *J* = 7.1 Hz, 2H, H-3, H-4), 3.69 (dd, *J* = 11.0, 6.0 Hz, 1H, H-6b), 3.55 (dd, *J* = 19.6, 9.7 Hz, 1H, H-2), 3.45 (dd, *J* = 11.5, 5.8 Hz, 1H, H-6a), 3.35 – 3.15 (m, 3H, H-5, SCH2), 3.15 – 3.06 (m, 4H, 2 CH2), 3.04 (s, 6H, 2 NCH3), 1.78 (s, 3H, NAc), 1.76 – 1.69 (m, 2H, CH2); 13C NMR (75 MHz, DMSO-*d*6) δ 169.35, 169.05, 163.75, 163.09, 156.62, 132.35, 131.57, 130.61, 129.65, 124.98, 124.22, 122.29, 113.25, 112.97, 83.77, 81.24, 75.48, 70.70, 61.44, 54.60, 44.47, 37.59, 37.09, 33.10, 28.13, 23.11; HRMS (ESI) calcd for C27H35N4O8S (M+H+) 575.2176, found 575.2184.

*N*-[3-[6-(piperidin-1-yl)-1,3-dioxo-1*H*-benzo[*de*]isoquinolin-2(3*H*)-yl]propyl]-2-[(2-acetamido-β-D-glucopyranosyl)thio]acetamide (**10d**): yellow solid; (0.53 g, 86.9 %) yield; [α]D25 -45.4 (c=0.2, DMSO); 1H NMR (300 MHz, DMSO-*d*6) δ 8.49 – 8.39 (m, 1H, ArH), 8.38 – 8.28 (m, 2H, ArH), 7.94 (t, *J* = 5.7 Hz, 1H, H-1), 7.86 – 7.68 (m, 2H, ArH, NH), 7.24 (d, *J* = 8.2 Hz, 1H, ArH), 4.50 (d, *J* = 10.3 Hz, 1H, H-1), 4.28 (br s, 3H, 3 OH), 4.04 (t, *J* = 7.0 Hz, 2H, H-3, H-4), 3.74 (d, *J* = 11.3 Hz, 1H, H-6b), 3.59 (dd, *J* = 19.6, 9.8 Hz, 1H, H-2), 3.48 (dd, *J* = 11.5, 5.3 Hz, 1H, H-6a), 3.40 – 3.22 (m, 3H, H-5, SCH2), 3.20 – 3.07 (m, 8H, 4 CH2), 1.89 – 1.76 (m, 9H, NAc, 3 CH2), 1.72 – 1.59 (m, 2H, CH2); 13C NMR (75 MHz, DMSO-*d*6) δ 169.31, 169.04, 163.70, 163.15, 156.79, 132.34, 130.65, 129.22, 125.82, 125.48, 122.52, 115.01, 114.93, 83.81, 81.26, 75.46, 70.71, 61.44, 54.60, 54.05, 37.65, 37.07, 33.11, 28.11, 25.82, 23.96, 23.11; HRMS (ESI) calcd for C30H39N4O8S (M+H+) 615.2489, found 615.2474.

**1.2. Synthesis of thioglycosyl−naphthalimides 16a-16o.**

**14a**: R2=Ph; **14b**: R2=4-FPh; **14c**: R2=BnO; **14d**: R2=CH2CH3; **14e**: R2=CH2CH2CH3;

**14f**: R2=CH(CH3)2; **14g**: R2=NHCH3; **14h**: R2=OCH2CCl3; **14i**: R2=CF3

**15a**: R1=piperidyl, R2=Ph; **15b**: R1=piperidyl, R2=4-FPh; **15c**: R1=piperidyl, R2=BnO;

**15d**: R1=piperidyl, R2=C2H5; **15e**: R1=piperidyl, R2=n-Pr; **15f**: R1=piperidyl, R2=i-Pr;

**15g**: R1=piperidyl, R2=CF3; **15h**: R1=piperidyl, R2=NHCH3; **15i**: R1=piperidyl, R2=OCH2CCl3;

**15j**: R1=Br, R2=Ph; **15k**: R1=Br, R2=4-FPh; **15l**: R1=Br, R2=Et; **15m**: R1=Br, R2=n-Pr;

**15n**: R1=Br, R2=i-Pr; **15o**: R1=Br, R2=CF3; **15p**: R1=Br, R2=OCH2CCl3

**16a**: R1=piperidyl, R2=Ph; **16b**: R1=piperidyl, R2=4-FPh; **16c**: R1=piperidyl, R2=BnO;

**16d**: R1=piperidyl, R2=C2H5; **16e**: R1=piperidyl, R2=n-Pr; **16f**: R1=piperidyl, R2=i-Pr;

**16g**: R1=piperidyl, R2=CF3; **16h**: R1=piperidyl, R2=NHCH3; **16j**: R1=Br, R2=Ph;

**16k**: R1=Br, R2=4-FPh; **16l**: R1=Br, R2=Et; **16m**: R1=Br, R2=n-Pr; **16n**: R1=Br, R2=i-Pr;

**16o**: R1=Br, R2=CF3

**Scheme S2.** Synthesis of thioglycosyl−naphthalimides **16a-16o**. (i) p-anisaladehyde, NaOH, H2O; (ii) Py, Ac2O; (iii) acetone, HCl, H2O; (iv) Et3N, CH2Cl2, R2COCl for **13a-13h**; Et3N, CH2Cl2, TFAA for **13i**; (v) HBr, CH3COOH, CH2Cl2; (vi) thiourea, acetone; (vii) Na2S2O5, CH2Cl2, H2O; (viii) K2CO3, acetone, H2O, **6a** or **6d**; (viii) CH3NH2, MeOH.

Compound **12** was synthesized according to procedures described in the literature.3

Compounds **13a-13i** were prepared according to published methods.4,5

A solution of compound **13a-13i** (10 mmol) in anhydrous CH2Cl2 (30 mL) at 0°C, then 33% HBr/HOAc was added (8 mL) was added dropwise. The solution was stirred for 3 h at room temperature and the completion of the reaction was confirmed by TLC (petroleum ether/EtOAc, 1:1 v/v) analysis. The reaction was then quenched with chilled H2O (200 mL), and the mixture was extracted with CH2Cl2 (3×100 ml). The organic phase was washed with water (2×40 mL), sat. NaHCO3 (50 mL) and dried over Na2SO4.The resulting solution was concentrated to a white foam and carried on without further purification. The resulting white foam was dissolved in 80 mL acetone, and thiourea (0.91 g, 12 mmol) was then added. The mixture was heated to reflux for 4 h until a white precipitate was observed. The solid precipitate was then filtered and washed with acetone (2×10 mL). Subsequently, the precipitate was dissolved in CH2Cl2 (60 mL) and H2O (40 mL), then Na2S2O5 (2.1 g, 11.0 mmol) was added. The resulting mixture was stirred vigorously and heated to reflux for 5 h, until TLC (EtOAc) indicated that the reaction was complete. The mixture was extracted with CH2Cl2 (3×30 mL). The combined organic layers were dried over Na2SO4 and concentrated. Finally, the resulting compounds **14a-14i** were obtained by recrystallized from petroleum ether/EtOAc.

2-benzamido-3,4,6-tri-O-acetyl-2-deoxy-1-thio-β-D-glucopyranose (**14a**): white solid; (2.8 g, 65.9 % over three steps) yield; [α]D25 -15.8 (c=1.0, CHCl3); 1H NMR (300 MHz, DMSO-*d*6) δ 8.60 (d, *J* = 9.4 Hz, 1H, NH), 7.88 – 7.70 (m, 2H, ArH), 7.62 – 7.41 (m, 3H, ArH), 5.27 (t, *J* = 9.8 Hz, 1H, H-3), 4.97 (t, *J* = 9.7 Hz, 2H, H-4, H-1), 4.21 (dd, *J* = 12.4, 4.8 Hz, 1H, H-6b), 4.17 – 4.01 (m, 2H, H-6a, H-2), 3.93 – 3.84 (m, 1H, H-5), 3.47 (d, *J* = 8.3 Hz, 1H, SH), 2.05 (s, 3H, OAc), 2.00 (s, 3H, OAc), 1.87 (s, 3H, OAc); 13C NMR (75 MHz, DMSO-*d*6) δ 170.19, 169.80, 169.36, 166.67, 134.43, 131.55, 128.48, 127.68, 127.33, 127.24, 78.91, 75.40, 73.65, 68.60, 62.06, 56.21, 20.64, 20.51, 20.37; HRMS (ESI) calcd for C19H24NO8S (M+H+) 426.1223, found 426.1229.

2-(4-fluorobenzamido)-3,4,6-tri-O-acetyl-2-deoxy-1-thio-β-D-glucopyranose (**14b**): white solid; (2.9 g, 65.5 % over three steps) yield; [α]D25 -19.6 (c=1.0, CHCl3); 1H NMR (300 MHz, DMSO-*d*6) δ 8.65 (d, *J* = 9.3 Hz, 1H, NH), 7.95 – 7.73 (m, 2H, ArH), 7.45 – 7.24 (m, 2H, ArH), 5.27 (t, *J* = 9.8 Hz, 1H, H-3), 5.05 – 4.92 (m, 2H, H-4, H-1), 4.22 (dd, *J* = 12.4, 4.8 Hz, 1H, H-6b), 4.17 – 4.01 (m, 2H, H-2, H-6a), 3.96 – 3.85 (m, 1H, H-5), 3.49 (d, *J* = 8.4 Hz, 1H, SH), 2.06 (s, 3H, OAc), 2.01 (s, 3H, OAc), 1.88 (s, 3H, OAc); 13C NMR (75 MHz, DMSO-*d*6) δ 170.19, 169.81, 169.37, 165.50, 130.84, 130.81, 129.95, 129.83, 115.59, 115.30, 78.86, 75.18, 73.62, 68.49, 62.15, 56.28, 20.63, 20.48, 20.35; HRMS (ESI) calcd for C19H23FNO8S (M+H+) 444.1128, found 444.1117.

2-[[(phenylmethoxy) carbonyl] amino]-3,4,6-tri-O-acetyl-2-deoxy-1-thio-β-D-glucopyranose (**14c**): white solid; (2.3g, 61.5 % over three steps) yield; [α]D25 -22.1 (c=1.0, CHCl3); 1H NMR (300 MHz, CDCl3) δ 7.41 – 7.29 (m, 5H, ArH), 5.25 – 5.03 (m, 5H, H-3, PhCH2, H-4, H-1), 4.61 (t, *J* = 9.5 Hz, 1H, NH), 4.24 (dd, *J* = 12.4, 4.9 Hz, 1H, H-6b), 4.11 (dd, *J* = 12.4, 1.8 Hz, 1H, H-6a), 3.83 – 3.62 (m, 2H, H-2, H-5), 2.49 (d, *J* = 9.2 Hz, 1H, SH), 2.09 (s, 3H, OAc), 2.01 (s, 3H, OAc), 1.92 (s, 3H, OAc).

2-propionamido-3,4,6-tri-O-acetyl-2-deoxy-1-thio-β-D-glucopyranose (**14d**): white solid; (2.3g, 61.5 % over three steps) yield; [α]D25-20.4 (c=1.0, CHCl3); 1H NMR (300 MHz, DMSO-*d*6) δ 7.94 (d, *J* = 9.4 Hz, 1H, NH), 5.06 (t, *J* = 9.8 Hz, 1H, H-3), 4.91 – 4.74 (m, 2H, H-4, H-1), 4.14 (dd, *J* = 12.4, 4.9 Hz, 1H, H-6b), 3.99 (dd, *J* = 12.4, 2.0 Hz, 1H, H-6a), 3.88 – 3.74 (m, 2H, H-5, H-2), 3.35 (d, J = 7.9 Hz, 1H, SH), 2.09 – 1.99 (m, 5H, CH2, OAc), 1.97 (d, *J* = 7.0 Hz, 3H, OAc), 1.89 (s, 3H, OAc), 0.96 (t, *J* = 7.6 Hz, 3H, CH3); 13C NMR (75 MHz, DMSO-*d*6) δ 173.18, 170.16, 169.69, 169.34, 78.84, 74.96, 73.51, 68.53, 62.14, 55.53, 28.95, 20.64, 20.49, 20.41, 10.02.

2-butyramido-3,4,6-tri-O-acetyl-2-deoxy-1-thio-β-D-glucopyranose (**14e**): white solid; (2.2 g, 56.2 % over three steps) yield; [α]D25 -28.3 (c=1.0, CHCl3); 1H NMR (300 MHz, DMSO-*d*6) δ 7.98 (d, *J* = 9.4 Hz, 1H, NH), 5.06 (t, *J* = 9.8 Hz, 1H, H-3), 4.93 – 4.70 (m, 2H, H-4, H-1), 4.14 (dd, *J* = 12.4, 4.9 Hz, 1H, H-6b), 3.99 (dd, *J* = 12.4, 2.0 Hz, 1H, H-6a), 3.91 – 3.76 (m, 2H, H-5, H-2), 3.33 (s, 1H, SH), 2.01 (s, 3H, OAc), 2.01 – 1.97 (m, 2H, CH2), 1.95 (s, 3H, OAc), 1.89 (s, 3H, OAc), 1.61 – 1.36 (m, 2H, CH2), 0.82 (t, *J* = 7.4 Hz, 3H, CH3); 13C NMR (75 MHz, DMSO-*d*6) δ 172.22, 170.17, 169.65, 169.34, 87.58, 78.93, 74.94, 73.46, 68.62, 62.14, 37.66, 20.63, 20.54, 20.47, 18.74, 13.54; HRMS (ESI) calcd for C16H26NO8S (M+H+) 392.1379, found 392.1371.

2-isobutyramido-3,4,6-tri-O-acetyl-2-deoxy-1-thio-β-D-glucopyranose (**14f**): white solid; (2.5 g, 63.9 % over three steps) yield; [α]D25 -25.9 (c=1.0, CHCl3);1H NMR (300 MHz, CDCl3) δ 6.10 (d, *J* = 9.5 Hz, 1H, NH), 5.24 – 5.03 (m, 2H, H-3, H-4), 4.66 (t, *J* = 9.7 Hz, 1H, H-1), 4.25 (dd, *J* = 12.4, 4.9 Hz, 1H, H-6b), 4.20 – 4.03 (m, 2H, H-2, H-6a), 3.74 (ddd, *J* = 9.5, 4.8, 2.2 Hz, 1H, H-5), 2.59 (d, *J* = 9.4 Hz, 1H, SH), 2.44 – 2.29 (m, 1H, CHCH3), 2.11 (s, 3H, OAc), 2.03 (s, 6H, 2 OAc), 1.14 (t, *J* = 6.6 Hz, 6H, 2 CH3); 13C NMR (75 MHz, CDCl3) δ 176.97, 170.63, 170.36, 168.87, 79.86, 75.87, 73.14, 67.98, 61.93, 56.04, 35.35, 20.40, 20.26, 20.22, 19.04, 18.87; HRMS (ESI) calcd for C16H26NO8S (M+H+) 392.1379, found 392.1363.

2-[[(methylamino)carbonyl]amino]- 3,4,6- tri- O- acetyl-2- deoxy -1- thio- β-D- glucopyranose (**14g**): white solid; (2.0 g, 52.9 % over three steps) yield; [α]D25 -17.9 (c=1.0, CHCl3); 1H NMR (300 MHz, DMSO-*d*6) δ 5.96 (s, 1H, NH), 5.89 (d, *J* = 5.1 Hz, 1H, NH), 5.20 – 5.03 (m, 3H, H-3, H-4, H-1), 4.15 (dd, *J* = 12.2, 4.3 Hz, 1H, H-6b), 4.05 – 3.76 (m, 3H, H-6a, H-2, H-5), 3.26 (s, 1H, SH), 2.48 (d, *J* = 2.1 Hz, 3H, NCH3), 1.98 (s, 3H, OAc), 1.94 (s, 3H, OAc), 1.88 (s, 3H, OAc); 13C NMR (75 MHz, DMSO-*d*6) δ 172.78, 170.11, 169.60, 161.24, 78.81, 75.03, 73.44, 68.51, 62.07, 55.42, 26.37, 20.62, 20.48, 20.43; HRMS (ESI) calcd for C14H23N2O8S (M+H+) 379.1175, found 379.1187.

2-[[(2,2,2-trichloroethoxy)carbonyl]amino]-3,4,6-tri-O-acetyl-2-deoxy-1-thio-β-D-glucopyranose (**14h**): white solid; (3.0 g, 60.4 % over three steps) yield; [α]D25 -20.4 (c=1.0, CHCl3); 1H NMR (300 MHz, CDCl3) δ 5.59 (d, *J* = 9.5 Hz, 1H, NH), 5.20 (t, *J* = 9.7 Hz, 1H, H-3), 5.10 (t, *J* = 9.6 Hz, 1H, H-4), 4.84 – 4.60 (m, 3H, H-1, CCl3CH2), 4.26 (dd, *J* = 12.4, 4.8 Hz, 1H, H-6b), 4.14 (dd, *J* = 12.4, 2.1 Hz, 1H, H-6a), 3.87 – 3.68 (m, 2H, H-2, H-5), 2.49 (br s, 1H, SH), 2.11 (s, 3H, OAc), 2.04 (s, 6H, 2 OAc); 13C NMR (75 MHz, CDCl3) δ 169.85, 169.76, 168.39, 153.48, 94.35, 79.08, 75.26, 73.57, 72.07, 67.42, 61.22, 58.00, 19.78, 19.64, 19.61.

2-trifluoroacetamido-3,4,6-tri-O-acetyl-2-deoxy-1-thio-β-D-glucopyranose (**14i**): white solid; (2.6 g, 62.3 % over three steps) yield; [α]D25 -63.5 (c=1.0, CHCl3); 1H NMR (300 MHz, DMSO-*d*6) δ 9.67 (d, *J* = 9.2 Hz, 1H, NH), 5.15 (t, *J* = 9.8 Hz, 1H, H-3), 4.98 – 4.81 (m, 2H, H-4, H-1), 4.16 (dd, *J* = 12.5, 4.9 Hz, 1H, H-6b), 4.01 (dd, *J* = 12.5, 1.7 Hz, 1H, H-6a), 3.97 – 3.82 (m, 2H, H-2, H-5), 3.75 (d, *J* = 7.5 Hz, 1H, SH), 2.02 (s, 3H, OAc), 1.97 (s, 3H, OAc), 1.91 (s, 3H, OAc); 13C NMR (75 MHz, DMSO-*d*6) δ 170.15, 169.70, 169.30, 156.62, 117.67, 113.85, 85.35, 75.43, 72.74, 68.25, 62.01, 52.58, 20.58, 20.42, 20.12.

A solution of **14a-14i** (2 mmol, 1.0 eq) in acetone (60 mL) and H2O (30 mL) was mixed with solid potassium carbonate (2.4 mmol, 1.2 eq), then **6a** (or **6d**) (2 mmol, 1 eq) was added. The mixture was stirred for 5 h at room temperature until TLC (petroleum ether/EtOAc, 1:2 v/v) indicated that the reaction was complete. After the solution was concentrated *in vacuo*, the residue was diluted with DCM (80 mL), washed with H2O (100 mL), brine (100 mL), dried over Na2SO4, and concentrated. Finally, the residue was purified by flash column chromatography (petroleum ether/EtOAc, 2:1 v/v) to afford **15a-15p**.

*N*-[3-[6-(piperidin-1-yl)-1,3-dioxo-1*H*-benzo[*de*]isoquinolin-2(3*H*)-yl]propyl]-2-[(2-benzamido-3,4,6- tri-O-acetyl-β-D-glucopyranosyl)thio]acetamide (**15a**): yellow solid; (1.4 g, 87.5 %) yield; [α]D25 -55.7 (c=0.2, DMSO); 1H NMR (300 MHz, DMSO-*d*6) δ 8.56 (d, *J* = 9.3 Hz, 1H, ArH), 8.47 – 8.28 (m, 3H, ArH), 7.99 (t, *J* = 5.7 Hz, 1H, NH), 7.86 – 7.68 (m, 3H, ArH, NH), 7.55 – 7.36 (m, 3H, ArH), 7.26 (d, *J* = 8.2 Hz, 1H, ArH), 5.32 (t, *J* = 9.7 Hz, 1H, H-3), 5.09 – 4.89 (m, 2H, H-4, H-1), 4.34 – 4.14 (m, 2H, H-6b, H-2), 4.12 – 3.95 (m, 3H, CH2Ar, H-6a), 3.92 – 3.81 (m, 1H, H-5), 3.37 – 3.26 (m, 2H, SCH2), 3.26 – 3.06 (m, 6H, 3 CH2), 2.02 (s, 3H, OAc), 2.00 (s, 3H, OAc), 1.87 (s, 3H, OAc), 1.86 – 1.71 (m, 6H, 3 CH2), 1.71 – 1.59 (m, 2H, CH2); 13C NMR (75 MHz, DMSO-*d*6) δ 170.15, 169.78, 169.39, 168.35, 166.52, 163.74, 163.19, 156.84, 134.32, 132.39, 131.44, 130.69, 129.29, 128.38, 127.24, 125.85, 125.53, 122.59, 115.08, 114.97, 83.10, 75.03, 73.80, 68.65, 62.09, 54.08, 52.79, 37.59, 37.03, 32.90, 28.03, 25.83, 23.97, 20.58, 20.53, 20.40; HRMS (ESI) calcd for C41H47N4O11S (M+H+) 803.2962, found 803.2968.

*N*-[3-[6-(piperidin-1-yl)-1,3-dioxo-1*H*-benzo[*de*]isoquinolin-2(3*H*)-yl]propyl]-2-[(2-(4-fluorobenzamido)-3,4,6- tri-O-acetyl-β-D-glucopyranosyl)thio]acetamide (**15b**): yellow solid; (1.5 g, 91.4 %) yield; [α]D25 -60.4 (c=0.2, DMSO); 1H NMR (300 MHz, DMSO-*d*6) δ 8.59 (d, *J* = 9.4 Hz, 1H, ArH), 8.49 – 8.33 (m, 3H, ArH), 7.97 (t, *J* = 5.5 Hz, 1H, NH), 7.85 – 7.73 (m, 3H, ArH, NH), 7.34 – 7.16 (m, 3H, ArH), 5.29 (t, *J* = 9.8 Hz, 1H, H-3), 5.03 – 4.91 (m, 2H, H-4, H-1), 4.32 – 4.11 (m, 2H, H-6b, H-2), 4.09 – 3.96 (m, 3H, CH2Ar, H-6a), 3.93 – 3.79 (m, 1H, H-5), 3.34 – 3.25 (m, 2H, SCH2), 3.24 – 3.17 (m, 4H, 2 CH2), 3.12 (dd, *J* = 12.8, 6.7 Hz, 2H, CH2), 2.00 (s, 3H, OAc), 1.99 (s, 3H, OAc), 1.86 (s, 3H, OAc), 1.85 – 1.71 (m, 6H, 3 CH2), 1.70 – 1.60 (m, 2H, CH2); 13C NMR (75 MHz, DMSO-*d*6) δ 170.16, 169.80, 169.39, 168.34, 165.44, 163.78, 163.23, 156.90, 132.42, 130.74, 129.94, 129.82, 129.33, 125.91, 125.58, 122.63, 115.53, 115.24, 115.11, 115.02, 83.03, 75.01, 73.75, 68.60, 62.08, 54.09, 52.84, 37.59, 37.01, 32.85, 28.03, 25.83, 23.97, 20.58, 20.54, 20.40; HRMS (ESI) calcd for C41H46FN4O11S (M+H+) 821.2868, found 821.2879.

*N*-[3-[6-(piperidin-1-yl)-1,3-dioxo-1*H*-benzo[*de*]isoquinolin-2(3*H*)-yl]propyl]-2-[[2-[[(phenylmethoxy)carbonyl]amino]-3,4,6- tri-O-acetyl-β-D-glucopyranosyl]thio]acetamide (**15c**): yellow solid; (1.4 g, 84.3 %) yield; [α]D25 -47.1 (c=0.2, DMSO); 1H NMR (300 MHz, DMSO-*d*6) δ 8.45 – 8.36 (m, 1H, ArH), 8.31 (d, *J* = 8.1 Hz, 2H, ArH), 7.96 (t, *J* = 5.6 Hz, 1H, NH), 7.77 – 7.66 (m, 1H, ArH), 7.51 (d, *J* = 9.6 Hz, 1H, NH), 7.38 – 7.22 (m, 5H, ArH), 7.20 (d, *J* = 8.2 Hz, 1H, ArH), 5.12 (t, *J* = 8.3 Hz, 1H, H-3), 5.09 – 4.85 (m, 3H, H-4, OCH2), 4.80 (d, *J* = 10.4 Hz, 1H, H-1), 4.18 (dd, *J* = 12.3, 4.7 Hz, 1H, H-6b), 4.08 – 3.96 (m, 3H, CH2Ar, H-6a), 3.86 – 3.75 (m, 1H, H-5), 3.66 (q, *J* = 10.0 Hz, 1H, H-2), 3.33 – 3.21 (m, 2H, SCH2), 3.20 – 3.05 (m, 6H, 3 CH2), 1.97 (s, 3H, OAc), 1.95 (s, 3H, OAc), 1.84 (s, 3H, OAc), 1.83 – 1.69 (m, 6H, 3 CH2), 1.68 – 1.55 (m, 2H, CH2); 13C NMR (75 MHz, DMSO-*d*6) δ 170.12, 169.61, 169.36, 168.28, 163.74, 163.19, 156.80, 155.91, 137.16, 132.37, 130.68, 130.63, 129.25, 128.36, 127.77, 127.41, 125.80, 125.49, 122.54, 115.04, 114.90, 83.11, 74.87, 73.86, 68.67, 65.49, 62.03, 54.52, 54.06, 37.63, 37.02, 32.87, 28.04, 25.83, 23.97, 20.55, 20.50, 20.36; HRMS (ESI) calcd for C42H49N4O12S (M+H+) 833.3068, found 833.3056.

*N*-[3-[6-(piperidin-1-yl)-1,3-dioxo-1*H*-benzo[*de*]isoquinolin-2(3*H*)-yl]propyl]-2-[(2-propionamido-3,4,6- tri-O-acetyl-β-D-glucopyranosyl)thio]acetamide (**15d**): yellow solid; (1.3 g, 86.1 %) yield; [α]D25 -40.5 (c=0.2, DMSO); 1H NMR (300 MHz, DMSO-*d*6) δ 8.43 (d, *J* = 7.1 Hz, 1H, ArH), 8.34 (dd, *J* = 8.2, 2.5 Hz, 2H, ArH), 8.05 – 7.89 (m, 2H, 2 NH), 7.81 – 7.70 (m, 1H, ArH), 7.25 (d, *J* = 8.2 Hz, 1H, ArH), 5.13 (t, *J* = 9.7 Hz, 1H, H-3), 4.91 (t, *J* = 9.7 Hz, 1H, H-4), 4.82 (d, *J* = 10.4 Hz, 1H, H-1), 4.20 (dd, *J* = 12.3, 4.7 Hz, 1H, H-6b), 4.10 – 4.00 (m, 3H, CH2Ar, H-6a), 4.00 – 3.89 (m, 1H, H-2), 3.88 – 3.80 (m, 1H, H-5), 3.35 – 3.21 (m, 2H, SCH2), 3.20 – 3.05 (m, 6H, 3 CH2), 2.09 – 2.01 (m, 2H, CH2), 2.00 (s, 3H, OAc), 1.98 (s, 3H, OAc), 1.93 (s, 3H, OAc), 1.88 – 1.72 (m, 6H, 3 CH2), 1.71 – 1.59 (m, 2H, CH2), 0.95 (t, *J* = 7.6 Hz, 3H, CH3); 13C NMR (75 MHz, DMSO-*d*6) δ 173.14, 170.13, 169.71, 169.36, 168.34, 163.73, 163.18, 156.82, 132.36, 130.67, 129.26, 125.83, 125.50, 122.56, 115.05, 114.94, 83.00, 74.85, 73.75, 68.64, 62.06, 54.07, 52.11, 37.62, 37.00, 32.84, 28.90, 28.05, 25.82, 23.96, 20.56, 20.51, 20.42, 9.99; HRMS (ESI) calcd for C37H47N4O11S (M+H+) 755.2962, found 755.2971.

*N*-[3-[6-(piperidin-1-yl)-1,3-dioxo-1*H*-benzo[*de*]isoquinolin-2(3*H*)-yl]propyl]-2-[(2-butyramido-3,4,6- tri-O-acetyl-β-D-glucopyranosyl)thio]acetamide (**15e**): yellow solid; (1.3 g, 84.6 %) yield; [α]D25 -49.3 (c=0.2, DMSO); 1H NMR (300 MHz, DMSO-*d*6) δ 8.41 (d, *J* = 7.2 Hz, 1H, ArH), 8.33 (dd, *J* = 8.2, 3.0 Hz, 2H, ArH), 7.95 – 7.81 (m, 2H, 2 NH), 7.78 – 7.68 (m, 1H, ArH), 7.23 (d, *J* = 8.2 Hz, 1H, ArH), 5.11 (t, *J* = 9.7 Hz, 1H, H-3), 4.87 (t, *J* = 9.7 Hz, 1H, H-4), 4.80 (d, *J* = 10.4 Hz, 1H, H-1), 4.16 (dd, *J* = 12.4, 4.8 Hz, 1H, H-6b), 4.06 – 3.87 (m, 4H, CH2Ar, H-6a, H-2), 3.85 – 3.74 (m, 1H, H-5), 3.29 – 3.21 (m, 2H, SCH2), 3.20 – 3.06 (m, 6H, 3 CH2), 2.01 – 1.95 (m, 5H, CH2, OAc), 1.94 (s, 3H, OAc), 1.88 (s, 3H, OAc), 1.83 – 1.69 (m, 6H, 3 CH2), 1.68 – 1.55 (m, 2H, CH2), 1.53 – 1.31 (m, 2H, CH2), 0.76 (t, *J* = 7.4 Hz, 3H, CH3); 13C NMR (75 MHz, DMSO-*d*6) δ 172.16, 170.13, 169.64, 169.37, 168.37, 163.74, 163.19, 156.83, 132.38, 130.68, 129.27, 125.84, 125.51, 122.56, 115.05, 114.95, 83.07, 74.83, 73.70, 68.72, 62.06, 54.07, 51.97, 37.62, 37.00, 32.83, 28.05, 25.83, 23.96, 20.56, 20.51, 20.46, 18.70, 13.50; HRMS (ESI) calcd for C38H49N4O11S (M+H+) 769.3119, found 769.3112.

*N*-[3-[6-(piperidin-1-yl)-1,3-dioxo-1*H*-benzo[*de*]isoquinolin-2(3*H*)-yl]propyl]-2-[(2-isobutyramido-3,4,6- tri-O-acetyl-β-D-glucopyranosyl)thio]acetamide (**15f**): yellow solid; (1.4 g, 91.1 %) yield; [α]D25 -68.8 (c=0.2, DMSO); 1H NMR (300 MHz, DMSO-*d*6) δ 8.40 (d, *J* = 7.2 Hz, 1H, ArH), 8.31 (dd, *J* = 8.2, 2.9 Hz, 2H, ArH), 7.93 (t, *J* = 5.6 Hz, 1H, NH), 7.85 (d, *J* = 9.5 Hz, 1H, NH), 7.77 – 7.66 (m, 1H, ArH), 7.21 (d, *J* = 8.2 Hz, 1H, ArH), 5.11 (t, *J* = 9.7 Hz, 1H, H-3), 4.87 (t, *J* = 9.8 Hz, 1H, H-4), 4.80 (d, *J* = 10.4 Hz, 1H, H-1), 4.16 (dd, *J* = 12.2, 4.6 Hz, 1H, H-6b), 4.07 – 3.96 (m, 3H, CH2Ar, H-6a), 3.95 – 3.84 (m, 1H, H-2), 3.84 – 3.73 (m, 1H, H-5), 3.32 – 3.17 (m, 2H, SCH2), 3.17 – 3.04 (m, 6H, 3 CH2), 2.30 – 2.14 (m, 1H, CHCH3), 1.96 (s, 3H, OAc), 1.94 (s, 3H, OAc), 1.87 (s, 3H, OAc), 1.83 – 1.68 (m, 6H, 3 CH2), 1.67 – 1.54 (m, 2H, CH2), 0.90 (dd, *J* = 6.8, 4.4 Hz, 6H, 2 CH3); 13C NMR (75 MHz, DMSO-*d*6) δ 176.16, 170.13, 169.67, 169.35, 168.38, 163.73, 163.18, 156.82, 132.37, 130.68, 129.26, 125.83, 125.51, 122.56, 115.05, 114.94, 83.02, 74.89, 73.74, 68.63, 62.07, 54.07, 51.93, 37.61, 37.00, 34.39, 32.80, 28.05, 25.83, 23.96, 20.55, 20.51, 20.41, 19.54, 19.08; HRMS (ESI) calcd for C38H49N4O11S (M+H+) 769.3119, found 769.3132.

*N*-[3-[6-(piperidin-1-yl)-1,3-dioxo-1*H*-benzo[*de*]isoquinolin-2(3*H*)-yl]propyl]-2-[(2-trifluoroacetamido-3,4,6- tri-O-acetyl-β-D-glucopyranosyl)thio]acetamide (**15g**): yellow solid; (1.3 g, 82.3 %) yield; [α]D25 -62.1 (c=0.2, DMSO); 1H NMR (300 MHz, DMSO-*d*6) δ 9.68 (d, *J* = 9.1 Hz, 1H, NH), 8.48 – 8.25 (m, 3H, ArH), 7.99 (t, *J* = 5.6 Hz, 1H, NH), 7.73 (dd, *J* = 8.4, 7.4 Hz, 1H, ArH), 7.21 (d, *J* = 8.2 Hz, 1H, ArH), 5.20 (t, *J* = 9.7 Hz, 1H, H-3), 5.02 – 4.82 (m, 2H, H-4, H-1), 4.17 (dd, *J* = 12.4, 4.8 Hz, 1H, H-6b), 4.08 – 3.91 (m, 4H, CH2Ar, H-6a, H-2), 3.89 – 3.75 (m, 1H, H-5), 3.27 (dd, *J* = 37.7, 10.1 Hz, 2H, SCH2), 3.17 – 3.05 (m, 6H, 3 CH2), 1.96 (s, 6H, 2 OAc), 1.90 (s, 3H, OAc), 1.84 – 1.68 (m, 6H, 3 CH2), 1.67 – 1.55 (m, 2H, CH2); 13C NMR (75 MHz, DMSO-*d*6) δ 170.10, 169.62, 169.35, 168.18, 163.73, 163.18, 156.81, 132.34, 130.65, 129.26, 125.82, 125.52, 122.57, 117.70, 115.07, 114.93, 113.88, 81.84, 75.03, 73.03, 68.33, 61.98, 54.06, 52.90, 37.58, 37.05, 32.70, 28.00, 25.82, 23.96, 20.53, 20.48, 20.18; HRMS (ESI) calcd for C36H42F3N4O11S (M+H+) 795.2523, found 795.2540.

*N*-[3-[6-(piperidin-1-yl)-1,3-dioxo-1*H*-benzo[*de*]isoquinolin-2(3*H*)-yl]propyl]-2-[[2-[[(methylamino)carbonyl]amino]-3,4,6- tri-O-acetyl-β-D-glucopyranosyl]thio]acetamide (**15h**): yellow solid; (1.2 g, 79.5 %) yield; [α]D25 -69.2 (c=0.2, DMSO); 1H NMR (300 MHz, DMSO-*d*6) δ 8.41 (d, *J* = 7.2 Hz, 1H, ArH), 8.32 (d, *J* = 8.2 Hz, 2H, ArH), 7.96 (t, *J* = 5.6 Hz, 1H, NH), 7.77 – 7.67 (m, 1H, ArH), 7.22 (d, *J* = 8.2 Hz, 1H, ArH), 6.01 – 5.84 (m, 2H, 2 NH), 5.13 (t, *J* = 9.7 Hz, 1H, H-3), 4.93 – 4.70 (m, 2H, H-4, H-1), 4.15 (dd, *J* = 12.3, 4.8 Hz, 1H, H-6b), 4.04 – 3.94 (m, 3H, CH2Ar, H-6a), 3.86 – 3.71 (m, 2H, H-2, H-5), 3.33 – 3.18 (m, 2H, SCH2), 3.18 – 3.04 (m, 6H, 3 CH2), 2.49 (d, *J* = 4.6 Hz, 3H, NCH3), 1.96 (s, 3H, OAc), 1.94 (s, 3H, OAc), 1.89 (s, 3H, OAc), 1.84 – 1.68 (m, 6H, 3 CH2), 1.67 – 1.54 (m, 2H, CH2); 13C NMR (75 MHz, DMSO-*d*6) δ 170.15, 169.80, 169.38, 168.45, 163.75, 163.20, 157.94, 156.83, 132.41, 130.72, 130.66, 129.27, 125.85, 125.51, 122.57, 115.07, 114.95, 83.74, 74.67, 74.14, 68.90, 62.12, 54.07, 53.24, 37.65, 36.99, 32.78, 28.07, 26.49, 25.83, 23.97, 20.56, 20.55, 20.53; HRMS (ESI) calcd for C36H46N5O11S (M+H+) 756.2915, found 756.2918.

*N*-[3-[6-(piperidin-1-yl)-1,3-dioxo-1*H*-benzo[*de*]isoquinolin-2(3*H*)-yl]propyl]-2-[[2-[[(2,2,2-trichloroethoxy)carbonyl]amino]-3,4,6- tri-O-acetyl-β-D-glucopyranosyl]thio]acetamide (**15i**): yellow solid; (1.4 g, 80.1 %) yield; [α]D25 -58.6 (c=0.2, DMSO); 1H NMR (300 MHz, DMSO-*d*6) δ 8.38 (dd, *J* = 7.2, 0.9 Hz, 1H, ArH), 8.29 (d, *J* = 8.1 Hz, 2H, ArH), 8.02 – 7.88 (m, 2H, 2 NH), 7.71 (dd, *J* = 8.4, 7.4 Hz, 1H, ArH), 7.19 (d, *J* = 8.2 Hz, 1H, ArH), 5.13 (t, *J* = 9.7 Hz, 1H, H-3), 4.95 – 4.66 (m, 4H, H-4, H-1, CH2O), 4.16 (dd, *J* = 12.3, 4.7 Hz, 1H, H-6b), 4.06 – 3.93 (m, 3H, CH2Ar, H-6a), 3.86 – 3.74 (m, 1H, H-5), 3.66 (dd, *J* = 19.9, 10.0 Hz, 1H, H-2), 3.32 – 3.18 (m, 2H, SCH2), 3.17 – 3.04 (m, 6H, 3 CH2), 1.96 (s, 3H, OAc), 1.95 (s, 3H, OAc), 1.88 (s, 3H, OAc), 1.82 – 1.70 (m, 6H, 3 CH2), 1.67 – 1.53 (m, 2H, CH2); 13C NMR (75 MHz, DMSO-*d*6) δ 170.11, 169.55, 169.37, 168.25, 163.73, 163.18, 156.80, 154.35, 132.37, 130.67, 130.63, 129.25, 125.79, 125.49, 122.53, 115.03, 114.90, 96.22, 82.90, 74.89, 73.62, 73.52, 68.64, 62.00, 54.64, 54.06, 37.63, 37.03, 32.81, 28.03, 25.82, 23.97, 20.54, 20.49, 20.45; HRMS (ESI) calcd for C37H44Cl3N4O12S (M+H+) 873.1742, found 873.1726.

*N*-[3-[6-bromo-1,3-dioxo-1*H*-benzo[*de*]isoquinolin-2(3*H*)-yl]propyl]-2-[(2-benzamido-3,4,6-tri-O-acetyl-β-D-glucopyranosyl)thio]acetamide (**15j**): yellow solid; (1.3 g, 81.8 %) yield; [α]D25 -43.9 (c=0.2, DMSO); 1H NMR (300 MHz, DMSO-*d*6) δ 8.61 – 8.42 (m, 3H, ArH), 8.25 (d, *J* = 7.9 Hz, 1H, ArH), 8.14 (d, *J* = 7.9 Hz, 1H, ArH), 8.02 – 7.88 (m, 2H, 2 NH), 7.75 – 7.67 (m, 2H, ArH), 7.45 – 7.35 (m, 3H, ArH), 5.30 (t, *J* = 9.7 Hz, 1H, H-3), 5.03 – 4.90 (m, 2H, H-4, H-1), 4.30 – 4.15 (m, 2H, H-6b, H-2), 4.09 – 3.95 (m, 3H, CH2Ar, H-6a), 3.89 – 3.78 (m, 1H, H-5), 3.38 – 3.19 (m, 2H, SCH2), 3.13 (dd, *J* = 12.9, 6.6 Hz, 2H, CH2), 1.99 (s, 3H, OAc), 1.98 (s, 3H, OAc), 1.85 (s, 3H, OAc), 1.82 – 1.70 (m, 2H, CH2); 13C NMR (75 MHz, DMSO-*d*6 ) δ 170.16, 169.79, 169.39, 168.39, 166.52, 163.01, 162.97, 134.32, 132.69, 131.66, 131.45, 131.41, 131.04, 129.87, 129.22, 128.84, 128.40, 127.24, 122.84, 122.07, 83.10, 75.02, 73.78, 68.66, 62.12, 52.77, 38.00, 37.02, 32.90, 27.84, 20.59, 20.54, 20.40; HRMS (ESI) calcd for C36H37BrN3O11S (M+H+) 798.1332, found 798.1345.

*N*-[3-[6-bromo-1,3-dioxo-1*H*-benzo[*de*]isoquinolin-2(3*H*)-yl]propyl]-2-[(2-(4-fluorobenzamido)-3,4,6-tri-O-acetyl-β-D-glucopyranosyl)thio]acetamide (**15k**): yellow solid; (1.4 g, 85.9 %) yield; [α]D25 -45.6 (c=0.2, DMSO); 1H NMR (300 MHz, DMSO-*d*6) δ 8.59 (d, *J* = 9.4 Hz, 1H, ArH), 8.51 – 8.38 (m, 2H, ArH), 8.23 (d, *J* = 7.9 Hz, 1H, ArH), 8.11 (d, *J* = 7.9 Hz, 1H, ArH), 7.98 (t, *J* = 5.6 Hz, 1H, NH), 7.94 – 7.86 (m, 1H, NH), 7.78 (dd, *J* = 8.7, 5.5 Hz, 2H, ArH), 7.23 (t, *J* = 8.8 Hz, 2H, ArH), 5.29 (t, *J* = 9.7 Hz, 1H, H-3), 5.03 – 4.89 (m, 2H, H-4, H-1), 4.28 – 4.10 (m, 2H, H-6b, H-2), 4.09 – 3.91 (m, 3H, CH2Ar, H-6a), 3.91 – 3.79 (m, 1H, H-5), 3.39 – 3.19 (m, 2H, SCH2), 3.13 (dd, *J* = 12.6, 6.5 Hz, 2H, CH2), 1.99 (s, 3H, OAc), 1.98 (s, 3H, OAc), 1.85 (s, 3H, OAc), 1.81 – 1.70 (m, 2H, CH2); 13C NMR (75 MHz, DMSO-*d*6) δ 170.15, 169.80, 169.39, 168.39, 165.44, 162.98, 162.93, 132.66, 131.62, 131.37, 131.00, 130.70, 129.95, 129.83, 129.21, 128.79, 128.32, 122.78, 122.01, 115.51, 115.22, 83.06, 75.02, 73.75, 68.63, 62.11, 52.85, 38.00, 37.02, 32.88, 27.85, 20.58, 20.53, 20.39; HRMS (ESI) calcd for C36H36BrFN3O11S (M+H+) 816.1238, found 816.1247.

*N*-[3-[6-bromo-1,3-dioxo-1*H*-benzo[*de*]isoquinolin-2(3*H*)-yl]propyl]-2-[(2-propionamido-3,4,6- tri-O-acetyl-β-D-glucopyranosyl)thio]acetamide (**15l**): yellow solid; (1.3 g, 86.6 %) yield; [α]D25 -50.7 (c=0.2, DMSO); 1H NMR (300 MHz, DMSO-*d*6) δ 8.57 – 8.43 (m, 2H, ArH), 8.27 (d, *J* = 7.9 Hz, 1H, ArH), 8.15 (d, *J* = 7.9 Hz, 1H, ArH), 8.03 – 7.86 (m, 3H, ArH, 2 NH), 5.10 (t, *J* = 9.7 Hz, 1H, H-3), 4.88 (t, *J* = 9.7 Hz, 1H, H-4), 4.79 (d, *J* = 10.4 Hz, 1H, H-1), 4.16 (dd, *J* = 12.4, 4.7 Hz, 1H, H-6b), 4.07 – 3.87 (m, 4H, CH2Ar, H-6a, H-2), 3.86 – 3.77 (m, 1H, H-5), 3.38 – 3.20 (m, 2H, SCH2), 3.14 (dd, *J* = 13.4, 6.5 Hz, 2H, CH2), 2.05 – 1.97 (m, 5H, CH2CH3, OAc), 1.96 (s, 3H, OAc), 1.90 (s, 3H, OAc), 1.86 – 1.71 (m, 2H, CH2), 0.93 (t, *J* = 7.6 Hz, 3H, CH3); 13C NMR (75 MHz, DMSO-*d*6) δ 173.16, 170.14, 169.71, 169.37, 168.38, 163.05, 163.00, 132.70, 131.68, 131.43, 131.06, 129.88, 129.22, 128.86, 128.40, 122.87, 122.09, 83.02, 74.85, 73.73, 68.66, 62.10, 52.11, 38.05, 37.01, 32.86, 28.90, 27.87, 20.56, 20.52, 20.43, 10.00; HRMS (ESI) calcd for C32H37BrN3O11S (M+H+) 750.1332, found 750.1347.

*N*-[3-[6-bromo-1,3-dioxo-1*H*-benzo[*de*]isoquinolin-2(3*H*)-yl]propyl]-2-[(2-butyramido-3,4,6- tri-O-acetyl-β-D-glucopyranosyl)thio]acetamide (**15m**): yellow solid; (1.2 g, 78.4 %) yield; [α]D25 -53.5 (c=0.2, DMSO); 1H NMR (300 MHz, DMSO-*d*6) δ 8.52 – 8.39 (m, 2H, ArH), 8.24 (d, *J* = 7.9 Hz, 1H, ArH), 8.12 (d, *J* = 7.9 Hz, 1H, ArH), 8.01 – 7.87 (m, 3H, ArH, 2 NH), 5.11 (t, *J* = 9.8 Hz, 1H, H-3), 4.88 (t, *J* = 9.7 Hz, 1H, H-4), 4.79 (d, *J* = 10.4 Hz, 1H, H-1), 4.17 (dd, *J* = 12.3, 4.7 Hz, 1H, H-6b), 4.08 – 3.98 (m, 3H, CH2Ar, H-6a), 3.98 – 3.88 (m, 1H, H-2), 3.87 – 3.75 (m, 1H, H-5), 3.34 – 3.19 (m, 2H, SCH2), 3.14 (dd, *J* = 13.2, 6.4 Hz, 2H, CH2), 2.01 – 1.96 (m, 5H, OAc, CH2), 1.95 (s, 3H, OAc), 1.89 (s, 3H, OAc), 1.85 – 1.72 (m, 2H, CH2), 1.44 (dd, *J* = 14.6, 7.3 Hz, 2H, CH2), 0.77 (t, *J* = 7.4 Hz, 3H, CH3); 13C NMR (75 MHz, DMSO-*d*6) δ 172.18, 170.13, 169.64, 169.37, 168.40, 163.00, 162.95, 132.66, 131.64, 131.38, 131.02, 129.82, 129.21, 128.81, 128.32, 122.79, 122.01, 83.08, 74.84, 73.69, 68.75, 62.10, 51.97, 38.04, 37.62, 37.01, 32.84, 27.87, 20.56, 20.51, 20.45, 18.70, 13.51; HRMS (ESI) calcd for C33H39BrN3O11S (M+H+) 764.1489, found 764.1498.

*N*-[3-[6-bromo-1,3-dioxo-1*H*-benzo[*de*]isoquinolin-2(3*H*)-yl]propyl]-2-[(2-isobutyramido-3,4,6- tri-O-acetyl-β-D-glucopyranosyl)thio]acetamide (**15n**): yellow solid; (1.3 g, 85.0 %) yield; [α]D25 -42.7 (c=0.2, DMSO); 1H NMR (300 MHz, DMSO-*d*6) δ 8.58 – 8.43 (m, 2H, ArH), 8.27 (d, *J* = 7.9 Hz, 1H, ArH), 8.15 (d, *J* = 7.9 Hz, 1H, ArH), 8.02 – 7.91 (m, 2H, 2 NH), 7.86 (d, *J* = 9.5 Hz, 1H, ArH), 5.12 (t, *J* = 9.8 Hz, 1H, H-3), 4.88 (t, *J* = 9.7 Hz, 1H, H-4), 4.80 (d, *J* = 10.4 Hz, 1H, H-1), 4.17 (dd, *J* = 12.4, 4.9 Hz, 1H, H-6b), 4.08 – 3.98 (m, 3H, CH2Ar, H-6a), 3.97 – 3.86 (m, 1H, H-2), 3.85 – 3.77 (m, 1H, H-5), 3.33 – 3.18 (m, 2H, SCH2), 3.18 – 3.07 (m, 2H, CH2), 2.32 – 2.16 (m, 1H, CHCH3), 1.97 (s, 3H, OAc), 1.96 (s, 3H, OAc), 1.89 (s, 3H, OAc), 1.78 (dt, *J* = 13.4, 6.8 Hz, 2H, CH2), 0.97 – 0.87 (m, 6H, 2 CH3); 13C NMR (75 MHz, DMSO-*d*6) δ 176.16, 170.13, 169.67, 169.35, 168.40, 163.05, 163.00, 132.70, 131.68, 131.42, 131.06, 129.89, 129.22, 128.86, 128.40, 122.87, 122.09, 83.02, 74.89, 73.73, 68.66, 62.10, 51.93, 38.03, 37.01, 34.38, 32.81, 27.88, 20.57, 20.52, 20.41, 19.55, 19.10; HRMS (ESI) calcd for C33H39BrN3O11S (M+H+) 764.1489, found 764.1471.

*N*-[3-[6-bromo-1,3-dioxo-1*H*-benzo[*de*]isoquinolin-2(3*H*)-yl]propyl]-2-[(2-trifluoroacetamido-3,4,6- tri-O-acetyl-β-D-glucopyranosyl)thio]acetamide (**15o**): yellow solid; (1.3 g, 82.3 %) yield; [α]D25 -47.4 (c=0.2, DMSO); 1H NMR (300 MHz, DMSO-*d*6) δ 9.67 (d, *J* = 9.0 Hz, 1H, NH), 8.54 – 8.39 (m, 2H, ArH), 8.24 (d, *J* = 7.9 Hz, 1H, ArH), 8.13 (d, *J* = 7.9 Hz, 1H, ArH), 8.00 (t, *J* = 5.6 Hz, 1H, NH), 7.92 (dd, *J* = 8.5, 7.4 Hz, 1H, ArH), 5.21 (t, *J* = 9.7 Hz, 1H, H-3), 5.03 – 4.83 (m, 2H, H-4, H-1), 4.17 (dd, *J* = 12.4, 4.8 Hz, 1H, H-6b), 4.08 – 3.95 (m, 4H, CH2Ar, H-6a, H-2), 3.90 – 3.78 (m, 1H, H-5), 3.40 – 3.20 (m, 2H, SCH2), 3.14 (dd, *J* = 13.0, 6.8 Hz, 2H, CH2), 1.97 (s, 3H, OAc), 1.97 (s, 3H, OAc), 1.91 (s, 3H, OAc), 1.85 – 1.69 (m, 2H, CH2); 13C NMR (75 MHz, DMSO-*d*6) δ 170.11, 169.62, 169.35, 168.22, 163.00, 162.95, 156.71, 156.22, 132.65, 131.62, 131.38, 131.00, 129.84, 129.20, 128.81, 128.34, 122.81, 122.04, 117.70, 113.87, 81.85, 75.03, 73.02, 68.33, 62.01, 52.89, 38.00, 37.05, 32.70, 27.82, 20.54, 20.48, 20.18; HRMS (ESI) calcd for C31H32BrF3N3O11S (M+H+) 790.0893, found 790.0876.

*N*-[3-[6-bromo-1,3-dioxo-1*H*-benzo[*de*]isoquinolin-2(3*H*)-yl]propyl]-2-[[2-[[(2,2,2-trichloroethoxy)carbonyl]amino]-3,4,6- tri-O-acetyl-β-D-glucopyranosyl]thio]acetamide (**15p**): yellow solid; (1.4 g, 80.5 %) yield; [α]D25 -57.1 (c=0.2, DMSO); 1H NMR (300 MHz, DMSO-*d*6) δ 8.41 (d, *J* = 7.2 Hz, 1H, ArH), 8.33 (d, *J* = 8.3 Hz, 1H, ArH), 8.15 (d, *J* = 7.9 Hz, 1H, ArH), 8.10 – 7.91 (m, 3H, ArH, 2 NH), 7.84 (t, *J* = 7.9 Hz, 1H, ArH), 5.14 (t, *J* = 9.7 Hz, 1H, H-3), 5.01 – 4.64 (m, 4H, H-4, H-1, CH2CCl3), 4.17 (dd, *J* = 11.1, 3.2 Hz, 1H, H-6b), 4.06 – 3.94 (m, 3H, H-6a, CH2Ar), 3.86 – 3.76 (m, 1H, H-5), 3.68 (q, *J* = 10.1 Hz, 1H, H-2), 3.42 – 3.21 (m, 2H, SCH2), 3.20 – 3.06 (m, 2H, CH2), 1.97 (s, 3H, OAc), 1.96 (s, 3H, OAc), 1.90 (s, 3H, OAc), 1.85 – 1.69 (m, 2H, CH2); 13C NMR (75 MHz, DMSO-*d*6) δ 170.10, 169.54, 169.35, 168.29, 162.82, 162.76, 154.34, 132.49, 131.51, 131.19, 130.85, 129.60, 129.17, 128.58, 128.05, 122.52, 121.74, 96.22, 82.90, 74.92, 73.63, 73.54, 68.69, 62.05, 54.64, 38.04, 37.06, 32.84, 27.85, 20.54, 20.48, 20.44; HRMS (ESI) calcd for C32H34BrCl3N3O12S (M+H+) 868.0112, found 868.0125.

A solution of **15a-15o** (1.0 mmol) was suspended in anhydrous MeOH (15 mL), and saturated solution of CH3NH2 in MeOH (10 mL) was then added. The reaction was stirred for 48 h at room temperature, until TLC (EtOAc/MeOH/H2O, 8:1:1 v/v/v) indicated that the reaction was complete. The mixture was concentrated *in vacuo* and recrystallized from MeOH/ether to obtain **16a-16o**.

*N*-[3-[6-(piperidin-1-yl)-1,3-dioxo-1*H*-benzo[*de*]isoquinolin-2(3*H*)-yl]propyl]-2-[(2-benzamido-β-D-glucopyranosyl)thio]acetamide (**16a**): yellow solid; (0.55 g, 81.2 %) yield; [α]D25 -22.5 (c=0.1, DMSO); 1H NMR (300 MHz, DMSO-*d*6) δ 8.37 (ddd, *J* = 18.0, 15.2, 8.3 Hz, 4H, ArH), 7.93 (t, *J* = 5.7 Hz, 1H, NH), 7.88 – 7.72 (m, 3H, ArH, NH), 7.47 – 7.35 (m, 3H, ArH), 7.27 (d, *J* = 8.2 Hz, 1H, ArH), 4.68 (d, *J* = 10.3 Hz, 1H, H-1), 4.51 (s, 3H, 3 OH), 4.02 (t, *J* = 7.1 Hz, 2H, H-3, H-4), 3.85 (dd, *J* = 19.5, 9.8 Hz, 1H, H-2), 3.76 (d, *J* = 11.4 Hz, 1H, H-6b), 3.60 – 3.46 (m, 2H, H-5, H-6a), 3.40 – 3.21 (m, 2H, SCH2), 3.20 – 3.03 (m, 8H, 4 CH2), 1.86 – 1.73 (m, 6H, 3 CH2), 1.70 – 1.59 (m, 2H, CH2); 13C NMR (75 MHz, DMSO-*d*6) δ 169.02, 166.45, 163.73, 163.18, 156.85, 134.97, 132.40, 131.05, 130.70, 129.28, 128.26, 128.14, 127.43, 125.88, 125.53, 122.58, 115.06, 114.99, 83.74, 81.40, 75.21, 70.80, 61.48, 55.13, 54.08, 37.63, 37.07, 33.09, 28.10, 25.83, 23.97; HRMS (ESI) calcd for C35H41N4O8S (M+H+) 677.2645, found 677.2629.

*N*-[3-[6-(piperidin-1-yl)-1,3-dioxo-1*H*-benzo[*de*]isoquinolin-2(3*H*)-yl]propyl]-2-[(2-(4-fluorobenzamido)-β-D-glucopyranosyl)thio]acetamide (**16b**): yellow solid; (0.57 g, 83.2 %) yield; [α]D25 -34.7 (c=0.1, DMSO); 1H NMR (300 MHz, DMSO-*d*6) δ 8.48 – 8.28 (m, 4H, ArH), 7.99 – 7.86 (m, 3H, ArH, 2 NH), 7.83 – 7.70 (m, 1H, ArH), 7.30 – 7.17 (m, 3H, ArH), 5.15 (s, 2H, 2 OH), 4.68 (d, *J* = 10.3 Hz, 1H, H-1), 4.02 (t, *J* = 7.0 Hz, 2H, H-3, H-4), 3.92 – 3.71 (m, 2H, H-2 H-6b), 3.61 – 3.45 (m, 2H, H-6a, H-5), 3.40 – 3.24 (m, 2H, SCH2), 3.22 – 3.08 (m, 8H, 4 CH2), 1.90 – 1.72 (m, 6H, 3 CH2), 1.71 – 1.59 (m, 2H, CH2); 13C NMR (75 MHz, DMSO-*d*6) δ 169.00, 165.39, 163.71, 163.17, 156.83, 132.37, 131.43, 131.39, 130.67, 130.09, 129.98, 129.26, 125.85, 125.52, 122.55, 115.20, 115.04, 114.96, 114.91, 83.69, 81.40, 75.21, 70.74, 61.47, 55.22, 54.07, 37.62, 37.07, 33.06, 28.11, 25.83, 23.97; HRMS (ESI) calcd for C35H40FN4O8S (M+H+) 695.2551, found 695.2572.

*N*-[3-[6-(piperidin-1-yl)-1,3-dioxo-1*H*-benzo[*de*]isoquinolin-2(3*H*)-yl]propyl]-2-[[2-[[(phenylmethoxy)carbonyl]amino]-β-D-glucopyranosyl]thio]acetamide (**16c**): yellow solid; (0.62 g, 87.7 %) yield; [α]D25 -30.9 (c=0.1, DMSO); 1H NMR (300 MHz, DMSO-*d*6) δ 8.45 – 8.36 (m, 1H, ArH), 8.35 – 8.24 (m, 2H, ArH), 7.90 (t, *J* = 5.6 Hz, 1H, NH), 7.73 (dd, *J* = 8.3, 7.4 Hz, 1H, ArH), 7.42 – 7.15 (m, 7H, ArH, NH), 5.07 (s, 1H, OH), 5.04 – 4.92 (m, 2H, PhCH2), 4.56 (s, 1H, OH), 4.48 (d, *J* = 9.9 Hz, 1H, H-1), 4.01 (t, *J* = 7.1 Hz, 2H, H-3, H-4), 3.69 (d, *J* = 11.5 Hz, 1H, H-6b), 3.43 (d, *J* = 11.7 Hz, 1H, H-6a), 3.34 – 3.28 (m, 2H, H-2, H-5), 3.27 – 3.17 (m, 2H, SCH2), 3.17 – 3.03 (m, 8H, 4 CH2), 1.86 – 1.69 (m, 6H, 3 CH2), 1.68 – 1.53 (m, 2H, CH2); 13C NMR (75 MHz, DMSO-*d*6) δ 168.96, 163.73, 163.19, 156.82, 156.19, 137.24, 132.39, 130.69, 129.26, 128.34, 127.71, 127.65, 125.85, 125.51, 122.55, 115.03, 114.96, 83.94, 81.25, 75.35, 70.78, 65.32, 61.42, 56.83, 54.07, 37.65, 37.08, 33.08, 28.10, 25.83, 23.97; HRMS (ESI) calcd for C36H43N4O9S (M+H+) 707.2751, found 707.2745.

*N*-[3-[6-(piperidin-1-yl)-1,3-dioxo-1*H*-benzo[*de*]isoquinolin-2(3*H*)-yl]propyl]-2-[(2-propionamido-glucopyranosyl)thio]acetamide (**16d**): yellow solid; (0.51 g, 81.1 %) yield; [α]D25 -28.4 (c=0.1, DMSO); 1H NMR (300 MHz, DMSO-*d*6) δ 8.39 (d, *J* = 7.2 Hz, 1H, ArH), 8.31 (dd, *J* = 8.1, 3.6 Hz, 2H, ArH), 7.89 (t, *J* = 5.6 Hz, 1H, NH), 7.79 – 7.62 (m, 2H, ArH, NH), 7.22 (d, *J* = 8.2 Hz, 1H, ArH), 4.70 (br s, 3H, 3 OH), 4.46 (d, *J* = 10.3 Hz, 1H, H-1), 4.00 (t, *J* = 7.0 Hz, 2H, H-3, H-4), 3.68 (d, *J* = 11.4 Hz, 1H, H-6b), 3.61 – 3.48 (m, 1H, H-2), 3.43 (dd, *J* = 10.8, 4.5 Hz, 1H, H-6a), 3.34 – 3.16 (m, 3H, H-5, SCH2), 3.15 – 3.03 (m, 8H, 4 CH2), 2.03 (q, *J* = 7.5 Hz, 2H, CH2CH3), 1.82 – 1.69 (m, 6H, 3 CH2), 1.66 – 1.53 (m, 2H, CH2), 0.95 (t, *J* = 7.6 Hz, 3H, CH3); 13C NMR (75 MHz, DMSO-*d*6) δ 172.98, 169.06, 163.72, 163.17, 156.82, 132.37, 130.67, 129.25, 125.86, 125.51, 122.55, 115.04, 114.97, 83.84, 81.29, 75.42, 70.74, 61.45, 54.46, 54.07, 37.65, 37.06, 33.05, 28.89, 28.12, 25.82, 23.97, 9.84; HRMS (ESI) calcd for C31H41N4O8S (M+H+) 629.2645, found 629.2653.

*N*-[3-[6-(piperidin-1-yl)-1,3-dioxo-1*H*-benzo[*de*]isoquinolin-2(3*H*)-yl]propyl]-2-[(2-butyramido-β-D-glucopyranosyl)thio]acetamide (**16e**): yellow solid; (0.55 g, 85.5 %) yield; [α]D25 -26.1 (c=0.1, DMSO); 1H NMR (300 MHz, DMSO-*d*6) δ 8.47 – 8.34 (m, 1H, ArH), 8.34 – 8.23 (m, 2H, ArH), 7.88 (t, *J* = 5.7 Hz, 1H, NH), 7.80 – 7.63 (m, 2H, NH, ArH), 7.21 (d, *J* = 8.2 Hz, 1H, ArH), 4.55 (s, 3H, 3 OH), 4.46 (d, *J* = 10.3 Hz, 1H, H-1), 4.00 (t, *J* = 7.1 Hz, 2H, H-3, H-4), 3.69 (d, *J* = 11.3 Hz, 1H, H-6b), 3.56 (q, *J* = 9.8 Hz, 1H, H-2), 3.43 (dd, *J* = 11.6, 5.4 Hz, 1H, H-6a), 3.33 – 3.15 (m, 3H, H-5, SCH2), 3.15 – 3.03 (m, 8H, 4 CH2), 1.99 (t, *J* = 7.2 Hz, 2H, CH2), 1.84 – 1.70 (m, 6H, 3 CH2), 1.67 – 1.55 (m, 2H, CH2), 1.53 – 1.37 (m, 2H, CH2CH3), 0.80 (t, *J* = 7.4 Hz, 3H, CH3); 13C NMR (75 MHz, DMSO-*d*6) δ 172.16, 169.09, 163.70, 163.15, 156.81, 132.36, 130.66, 129.24, 125.84, 125.50, 122.53, 115.02, 114.95, 83.83, 81.29, 75.43, 70.79, 61.45, 54.41, 54.06, 37.85, 37.64, 37.07, 32.99, 28.12, 25.82, 23.96, 18.73, 13.75; HRMS (ESI) calcd for C32H43N4O8S (M+H+) 643.2802, found 643.2817.

*N*-[3-[6-(piperidin-1-yl)-1,3-dioxo-1*H*-benzo[*de*]isoquinolin-2(3*H*)-yl]propyl]-2-[(2-isobutyramido-β-D-glucopyranosyl)thio]acetamide (**16f**): yellow solid; (0.53 g, 82.4 %) yield; [α]D25 -20.3 (c=0.1, DMSO); 1H NMR (300 MHz, DMSO-*d*6) δ 8.37 (d, *J* = 7.3 Hz, 1H, ArH), 8.28 (dd, *J* = 7.9, 2.9 Hz, 2H, ArH), 7.87 (t, *J* = 5.6 Hz, 1H, NH), 7.76 – 7.68 (m, 1H, ArH), 7.62 (d, *J* = 9.4 Hz, 1H, NH), 7.19 (d, *J* = 8.2 Hz, 1H, ArH), 4.48 (d, *J* = 10.3 Hz, 1H, H-1), 4.36 (s, 3H, 3 OH), 3.99 (t, *J* = 7.0 Hz, 2H, H-3, H-4), 3.69 (d, *J* = 11.3 Hz, 1H, H-6b), 3.61 – 3.48 (m, 1H, H-2), 3.43 (dd, *J* = 11.5, 5.3 Hz, 1H, H-6a), 3.34 – 3.15 (m, 3H, H-5, SCH2), 3.14 – 3.04 (m, 8H, 4 CH2), 2.32 – 2.21 (m, 1H, CHCH3), 1.83 – 1.71 (m, 6H, 3 CH2), 1.67 – 1.54 (m, 2H, CH2), 0.95 (dd, *J* = 6.8, 3.6 Hz, 6H, 2 CH3); 13C NMR (75 MHz, DMSO-*d*6) δ 176.14, 169.13, 163.69, 163.14, 156.80, 132.35, 130.65, 129.22, 125.82, 125.48, 122.51, 115.00, 114.93, 83.88, 81.32, 75.37, 70.81, 61.47, 54.26, 54.05, 37.63, 37.07, 34.41, 32.97, 28.12, 25.82, 23.96, 19.74, 19.35; HRMS (ESI) calcd for C32H43N4O8S (M+H+) 643.2802, found 643.2786.

*N*-[3-[6-(piperidin-1-yl)-1,3-dioxo-1*H*-benzo[*de*]isoquinolin-2(3*H*)-yl]propyl]-2-[(2-trifluoroacetamido-β-D-glucopyranosyl)thio]acetamide (**16g**): yellow solid; (0.59 g, 88.3 %) yield; [α]D25 -17.5 (c=0.1, DMSO); 1H NMR (300 MHz, DMSO-*d*6) δ 9.28 (s, 1H, NH), 8.39 (d, *J* = 7.2 Hz, 1H, ArH), 8.31 (dd, *J* = 7.9, 4.4 Hz, 2H, ArH), 7.93 (t, *J* = 5.7 Hz, 1H, NH), 7.79 – 7.66 (m, 1H, ArH), 7.22 (d, *J* = 8.2 Hz, 1H, ArH), 5.30 (d, *J* = 5.7 Hz, 1H, OH), 5.16 (d, *J* = 5.1 Hz, 1H, OH), 4.69 – 4.52 (m, 2H, OH, H-1), 4.00 (t, *J* = 7.0 Hz, 2H, H-3, H-4), 3.69 (dd, *J* = 11.3, 6.2 Hz, 1H, H-6b), 3.64 – 3.51 (m, 1H, H-5), 3.50 – 3.38 (m, 2H, H-6a, H-2), 3.34 – 3.18 (m, 2H, SCH2), 3.18 – 3.04 (m, 8H, 4 CH2), 1.85 – 1.69 (m, 6H, 3 CH2), 1.68 – 1.54 (m, 2H, CH2); 13C NMR (75 MHz, DMSO-*d*6) δ 168.76, 163.72, 163.18, 156.82, 156.19, 132.37, 130.67, 129.26, 125.86, 125.51, 122.56, 117.99, 115.04, 114.97, 114.17, 82.41, 81.38, 74.45, 70.49, 61.26, 55.44, 54.07, 37.62, 37.08, 32.90, 28.07, 25.82, 23.96; HRMS (ESI) calcd for C30H36F3N4O8S (M+H+) 669.2206, found 669.2189.

*N*-[3-[6-(piperidin-1-yl)-1,3-dioxo-1*H*-benzo[*de*]isoquinolin-2(3*H*)-yl]propyl]-2-[[2-[[(methylamino)carbonyl]amino]-β-D-glucopyranosyl]thio]acetamide (**16h**): yellow solid; (0.55 g, 87.3 %) yield; [α]D25 -18.8 (c=0.1, DMSO); 1H NMR (300 MHz, DMSO-*d*6) δ 8.38 (d, *J* = 7.2 Hz, 1H, ArH), 8.29 (dd, *J* = 8.2, 2.6 Hz, 2H, ArH), 7.92 (t, *J* = 5.6 Hz, 1H, NHCH2), 7.72 (t, *J* = 7.9 Hz, 1H, ArH), 7.20 (d, *J* = 8.2 Hz, 1H, ArH), 5.85 (d, *J* = 8.8 Hz, 1H, NH, NHCH), 5.75 (q, *J* = 4.4 Hz, 1H, NHCH3), 5.13 – 4.91 (m, 2H, 2 OH), 4.56 (t, *J* = 5.6 Hz, 1H, OH), 4.48 (d, *J* = 10.1 Hz, 1H, H-1), 3.99 (t, *J* = 7.0 Hz, 2H, H-3, H-4), 3.68 (dd, *J* = 10.9, 5.7 Hz, 1H, H-6b), 3.49 – 3.36 (m, 2H, H-6a, H-2), 3.33 – 3.17 (m, 3H, H-5, SCH2), 3.17 – 3.01 (m, 8H, 4 CH2), 2.51 (d, *J* = 4.6 Hz, 3H, NCH3), 1.85 – 1.67 (m, 6H, 3 CH2), 1.66 – 1.52 (m, 2H, CH2); 13C NMR (75 MHz, DMSO-*d*6) δ 169.13, 163.70, 163.15, 158.63, 156.79, 132.36, 130.67, 129.23, 125.84, 125.49, 122.55, 115.04, 114.95, 84.36, 81.14, 76.25, 70.98, 61.49, 55.57, 54.06, 37.67, 37.08, 32.99, 28.13, 26.51, 25.82, 23.96; HRMS (ESI) calcd for C30H40N5O8S (M+H+) 630.2598, found 630.2583.

*N*-[3-[6-bromo-1,3-dioxo-1*H*-benzo[*de*]isoquinolin-2(3*H*)-yl]propyl]-2-[(2-benzamido-β-D-glucopyranosyl)thio]acetamide (**16j**): yellow solid; (0.53 g, 79.1 %) yield; [α]D25 -45.4 (c=0.1, DMSO); 1H NMR (300 MHz, DMSO-*d*6) δ 8.49 – 8.36 (m, 2H, ArH), 8.32 (d, *J* = 9.2 Hz, 1H, ArH), 8.19 (d, *J* = 7.9 Hz, 1H, ArH), 8.08 (d, *J* = 7.9 Hz, 1H, ArH), 7.99 – 7.85 (m, 2H, 2 NH), 7.85 – 7.78 (m, 2H, ArH), 7.44 – 7.34 (m, 3H, ArH), 4.71 (br s, 3H, 3 OH), 4.67 (d, *J* = 10.3 Hz, 1H, H-1), 3.98 (t, *J* = 7.1 Hz, 2H, H-3, H-4), 3.84 (dd, *J* = 19.5, 9.8 Hz, 1H, H-2), 3.74 (d, *J* = 11.4 Hz, 1H, H-6b), 3.61 – 3.44 (m, 2H, H-6a , H-5), 3.39 – 3.21 (m, 2H, SCH2), 3.21 – 3.17 (m, 2H, CH2), 3.16 – 3.05 (m, 2H, CH2), 1.79 – 1.71 (m, 2H, CH2); 13C NMR (75 MHz, DMSO-*d*6) δ 169.11, 166.48, 162.94, 162.89, 134.94, 132.61, 131.60, 131.34, 131.07, 130.98, 129.78, 129.21, 128.76, 128.26, 128.15, 127.44, 122.71, 121.94, 83.80, 81.37, 75.19, 70.80, 61.49, 55.14, 38.03, 37.08, 33.16, 27.90; HRMS (ESI) calcd for C30H31BrN3O8S (M+H+) 672.1015, found 672.1028.

*N*-[3-[6-bromo-1,3-dioxo-1*H*-benzo[*de*]isoquinolin-2(3*H*)-yl]propyl]-2-[(2-(4-fluorobenzamido)-β-D-glucopyranosyl)thio]acetamide (**16k**): yellow solid; (0.60 g, 86.9 %) yield; [α]D25 -40.5 (c=0.1, DMSO); 1H NMR (300 MHz, DMSO-*d*6) δ 8.49 – 8.32 (m, 3H, ArH), 8.20 (d, *J* = 7.9 Hz, 1H, ArH), 8.09 (d, *J* = 7.9 Hz, 1H, ArH), 7.96 – 7.84 (m, 4H, 2 NH, ArH), 7.21 (t, *J* = 8.8 Hz, 2H, ArH), 4.66 (d, *J* = 10.2 Hz, 1H, H-1), 4.56 (br s, 3H, 3 OH), 3.98 (t, *J* = 7.0 Hz, 2H, H-3, H-4), 3.88 – 3.68 (m, 2H, H-2, H-6b), 3.58 – 3.44 (m, 2H, H-5, H-6a), 3.37 – 3.20 (m, 2H, SCH2), 3.18 – 3.04 (m, 4H, 2 CH2), 1.77 – 1.65 (m, 2H, CH2); 13C NMR (75 MHz, DMSO-*d*6) δ 169.10, 165.41, 162.95, 162.90, 132.62, 131.60, 131.35, 130.98, 130.10, 129.99, 129.80, 129.21, 128.77, 128.28, 122.72, 121.94, 115.19, 114.91, 83.76, 81.37, 75.17, 70.75, 61.47, 55.22, 38.02, 37.07, 33.13, 27.90; HRMS (ESI) calcd for C30H30BrFN3O8S (M+H+) 690.0921, found 690.0904.

*N*-[3-[6-bromo-1,3-dioxo-1*H*-benzo[*de*]isoquinolin-2(3*H*)-yl]propyl]-2-[(2-propionamido-β-D-glucopyranosyl)thio]acetamide (**16l**): yellow solid; (0.52 g, 83.3 %) yield; [α]D25 -37.6 (c=0.1, DMSO); 1H NMR (300 MHz, DMSO-*d*6) δ 8.50 – 8.36 (m, 2H, ArH), 8.20 (d, *J* = 7.9 Hz, 1H, ArH), 8.09 (d, *J* = 7.9 Hz, 1H, ArH), 7.97 – 7.85 (m, 2H, 2 NH), 7.66 (d, *J* = 9.3 Hz, 1H, ArH), 4.47 (d, *J* = 10.3 Hz, 1H, H-1), 4.23 (br s, 3H, 3 OH), 4.00 (t, *J* = 7.1 Hz, 2H, H-3, H-4), 3.69 (d, *J* = 11.1 Hz, 1H, H-6b), 3.56 (dd, *J* = 19.5, 9.8 Hz, 1H, H-2), 3.44 (dd, *J* = 11.7, 5.4 Hz, 1H, H-6a), 3.36 – 3.18 (m, 3H, H-5, SCH2), 3.16 – 3.06 (m, 4H, 2 CH2), 2.05 (q, *J* = 7.5 Hz, 2H, CH2CH3), 1.82 – 1.74 (m, 2H, CH2), 0.96 (t, *J* = 7.6 Hz, 3H, CH3); 13C NMR (75 MHz, DMSO-*d*6) δ 173.02, 169.13, 162.96, 162.91, 132.62, 131.61, 131.37, 130.99, 129.80, 129.20, 128.79, 128.28, 122.75, 121.97, 83.88, 81.27, 75.42, 70.76, 61.47, 54.49, 38.06, 37.08, 33.11, 28.90, 27.93, 9.85; HRMS (ESI) calcd for C26H31BrN3O8S (M+H+) 624.1015, found 624.1003.

*N*-[3-[6-bromo-1,3-dioxo-1*H*-benzo[*de*]isoquinolin-2(3*H*)-yl]propyl]-2-[(2-butyramido-β-D-glucopyranosyl)thio]acetamide (**16m**): yellow solid; (0.55 g, 85.9 %) yield; [α]D25 -33.7 (c=0.1, DMSO); 1H NMR (300 MHz, DMSO-*d*6) δ 8.44 (dd, *J* = 16.1, 7.9 Hz, 2H, ArH), 8.23 (d, *J* = 7.9 Hz, 1H, ArH), 8.11 (d, *J* = 7.9 Hz, 1H, ArH), 7.97 – 7.86 (m, 2H, 2 NH), 7.70 (d, *J* = 9.3 Hz, 1H, ArH), 4.48 (d, *J* = 10.3 Hz, 1H, H-1), 4.36 (br s, 3H, 3 OH), 4.01 (t, *J* = 7.0 Hz, 2H, H-3, H-4), 3.69 (d, *J* = 11.5 Hz, 1H, H-6b), 3.57 (dd, *J* = 19.5, 9.7 Hz, 1H, H-2), 3.44 (dd, *J* = 12.0, 5.3 Hz, 1H, H-6a), 3.35 – 3.17 (m, 3H, H-5, SCH2), 3.16 – 3.06 (m, 4H, 2 CH2), 2.01 (t, *J* = 7.2 Hz, 2H, CH2), 1.86 – 1.70 (m, 2H, CH2), 1.56 – 1.40 (m, 2H, CH2), 0.82 (t, *J* = 7.4 Hz, 3H, CH3); 13C NMR (75 MHz, DMSO-*d*6) δ 172.18, 169.15, 162.99, 162.93, 132.65, 131.63, 131.39, 131.02, 129.83, 129.21, 128.82, 128.32, 122.78, 122.01, 83.86, 81.27, 75.42, 70.81, 61.46, 54.44, 38.06, 37.86, 37.08, 33.05, 27.93, 18.73, 13.75; HRMS (ESI) calcd for C27H33BrN3O8S (M+H+) 638.1172, found 638.1159.

*N*-[3-[6-bromo-1,3-dioxo-1*H*-benzo[*de*]isoquinolin-2(3*H*)-yl]propyl]-2-[(2-isobutyramido-β-D-glucopyranosyl)thio]acetamide (**16n**): yellow solid; (0.53 g, 82.8 %) yield; [α]D25 -26.5 (c=0.1, DMSO); 1H NMR (300 MHz, DMSO-*d*6) δ 8.51 – 8.40 (m, 2H, ArH), 8.23 (d, *J* = 7.9 Hz, 1H, ArH), 8.12 (d, *J* = 7.9 Hz, 1H, ArH), 7.96 – 7.87 (m, 2H, 2 NH), 7.63 (d, *J* = 9.2 Hz, 1H, ArH), 4.49 (d, *J* = 10.3 Hz, 1H, H-1), 4.37 (br s, 3H, 3 OH), 4.01 (t, *J* = 7.1 Hz, 2H, H-3, H-4), 3.69 (d, *J* = 11.2 Hz, 1H, H-6b), 3.55 (dd, *J* = 19.6, 9.8 Hz, 1H, H-2), 3.44 (dd, *J* = 11.5, 5.3 Hz, 1H, H-6a), 3.34 – 3.16 (m, 3H, H-5, SCH2), 3.15 – 3.05 (m, 4H, 2 CH2), 2.32 – 2.25 (m, 1H, CHCH3), 1.83 – 1.72 (m, 2H, CH2), 1.00 – 0.91 (m, 6H, 2 CH3); 13C NMR (75 MHz, DMSO-*d*6) δ 176.15, 169.18, 162.99, 162.94, 132.66, 131.64, 131.40, 131.02, 129.84, 129.21, 128.83, 128.34, 122.80, 122.02, 83.92, 81.31, 75.35, 70.82, 61.47, 54.28, 38.05, 37.08, 34.41, 33.02, 27.94, 19.74, 19.36; HRMS (ESI) calcd for C27H33BrN3O8S (M+H+) 638.1172, found 638.1155.

*N*-[3-[6-bromo-1,3-dioxo-1*H*-benzo[*de*]isoquinolin-2(3*H*)-yl]propyl]-2-[(2-trifluoroacetamido-β-D-glucopyranosyl)thio]acetamide (**16o**): yellow solid; (0.59 g, 88.9 %) yield; [α]D25 -42.3 (c=0.1, DMSO); 1H NMR (300 MHz, DMSO-*d*6) δ 8.56 – 8.44 (m, 2H, ArH), 8.27 (d, *J* = 7.9 Hz, 1H, ArH), 8.15 (d, *J* = 7.9 Hz, 1H, ArH), 7.99 – 7.90 (m, 2H, ArH, NH), 4.63 (d, *J* = 10.2 Hz, 1H, H-1), 4.02 (t, *J* = 7.1 Hz, 2H, H-3, H-4), 3.69 (d, *J* = 11.6 Hz, 1H, H-6b), 3.63 – 3.52 (m, 1H, H-2), 3.50 – 3.39 (m, 2H, H-5, H-6a), 3.27 (dd, *J* = 43.0, 14.1 Hz, 2H, SCH2), 3.16 – 3.05 (m, 4H, 2 CH2), 1.85 – 1.71 (m, 2H, CH2); 13C NMR (75 MHz, DMSO-*d*6) δ 168.82, 163.04, 162.99, 156.67, 156.20, 132.69, 131.67, 131.43, 131.05, 129.89, 129.21, 128.87, 128.41, 122.87, 122.10, 118.00, 114.17, 82.48, 81.38, 74.44, 70.51, 61.28, 55.45, 38.03, 37.09, 32.95, 27.88; HRMS (ESI) calcd for C25H26BrF3N3O8S (M+H+) 664.0576, found 664.0558.

**1.3. New method for the synthesis of thioglycosyl−naphthalimides 16h.**

**Scheme S3.** Synthesis of thioglycosyl−naphthalimides **16h**. (i) CH3NH2, MeOH.

A solution of **15i** (1.0 mmol) was suspended in anhydrous MeOH (20 mL), and saturated solution of CH3NH2 in MeOH (10 mL) was then added. The reaction was stirred for 48 h at room temperature, until TLC (EtOAc/MeOH/H2O, 8:1:1 v/v/v) indicated that the reaction was complete. The mixture was concentrated *in vacuo* and recrystallized from MeOH/ether to obtain **16h**.

*N*-[3-[6-(piperidin-1-yl)-1,3-dioxo-1*H*-benzo[*de*]isoquinolin-2(3*H*)-yl]propyl]-2-[[2-[[(methylamino)carbonyl]amino]-β-D-glucopyranosyl]thio]acetamide (**16h**): yellow solid; (0.49 g, 77.8 %) yield; [α]D25 -18.8 (c=0.1, DMSO); 1H NMR (300 MHz, DMSO-*d*6) δ 8.38 (d, *J* = 7.2 Hz, 1H, ArH), 8.29 (dd, *J* = 8.2, 2.6 Hz, 2H, ArH), 7.92 (t, *J* = 5.6 Hz, 1H, NHCH2), 7.72 (t, *J* = 7.9 Hz, 1H, ArH), 7.20 (d, *J* = 8.2 Hz, 1H, ArH), 5.85 (d, *J* = 8.8 Hz, 1H, NH, NHCH), 5.75 (q, *J* = 4.4 Hz, 1H, NHCH3), 5.13 – 4.91 (m, 2H, 2 OH), 4.56 (t, *J* = 5.6 Hz, 1H, OH), 4.48 (d, *J* = 10.1 Hz, 1H, H-1), 3.99 (t, *J* = 7.0 Hz, 2H, H-3, H-4), 3.68 (dd, *J* = 10.9, 5.7 Hz, 1H, H-6b), 3.49 – 3.36 (m, 2H, H-6a, H-2), 3.33 – 3.17 (m, 3H, H-5, SCH2), 3.17 – 3.01 (m, 8H, 4 CH2), 2.51 (d, *J* = 4.6 Hz, 3H, NCH3), 1.85 – 1.67 (m, 6H, 3 CH2), 1.66 – 1.52 (m, 2H, CH2); 13C NMR (75 MHz, DMSO-*d*6) δ 169.13, 163.70, 163.15, 158.63, 156.79, 132.36, 130.67, 129.23, 125.84, 125.49, 122.55, 115.04, 114.95, 84.36, 81.14, 76.25, 70.98, 61.49, 55.57, 54.06, 37.67, 37.08, 32.99, 28.13, 26.51, 25.82, 23.96; HRMS (ESI) calcd for C30H40N5O8S (M+H+) 630.2598, found 630.2583.

**1.4. Synthesis of ureido glycosides 17a-17d.**

**17a**: R1=piperidyl, R3=C2H5; **17b**: R1=piperidyl, R3=n-Pr; **17c**: R1=Br, R3=CH3; **17d**: R1=Br, R3=C2H5

**Scheme S4.** Synthesis of ureido glycosides **17a-17d**. (i) R3NH2, MeOH.

A solution of **15i** (1.0 mmol) was suspended in anhydrous MeOH (20 mL), and substituted amine (2 mL) was then added. The reaction was stirred for 48 h at room temperature, until TLC (EtOAc/MeOH/H2O, 8:1:1 v/v/v) indicated that the reaction was complete. The mixture was concentrated *in vacuo* and recrystallized from MeOH/ether to obtain **17a-17d**.

*N*-[3-[6-(piperidin-1-yl)-1,3-dioxo-1*H*-benzo[*de*]isoquinolin-2(3*H*)-yl]propyl]-2-[[2-[[(ethylamino)carbonyl]amino]-β-D-glucopyranosyl]thio]acetamide (**17a**): yellow solid; (0.48 g, 74.5 %) yield; [α]D25 -25.3 (c=0.1, DMSO); 1H NMR (300 MHz, DMSO-*d*6) δ 8.45 (d, *J* = 7.2 Hz, 1H, ArH), 8.41 – 8.33 (m, 2H, ArH), 7.91 (t, *J* = 5.6 Hz, 1H, NH), 7.84 – 7.74 (m, 1H, ArH), 7.28 (d, *J* = 8.2 Hz, 1H, ArH), 5.93 – 5.73 (m, 2H, 2NH), 4.47 (d, *J* = 10.1 Hz, 1H, H-1), 4.33 (s, 3H, 3 OH), 4.03 (t, *J* = 7.1 Hz, 2H, H-3, H-4), 3.69 (d, *J* = 10.6 Hz, 1H, H-6b), 3.49 – 3.37 (m, 2H, H-6a, H-2), 3.37 – 3.21 (m, 3H, H-5, SCH2), 3.20 – 3.03 (m, 8H, 4 CH2), 3.01 – 2.94 (m, 2H, CH2), 1.86 – 1.71 (m, 6H, 3 CH2), 1.69 – 1.56 (m, 2H, CH2), 0.95 (t, *J* = 7.2 Hz, 3H, CH3); 13C NMR (75 MHz, DMSO-*d*6) δ 169.15, 163.73, 163.18, 158.06, 156.83, 132.39, 130.70, 129.28, 125.87, 125.54, 122.59, 115.08, 114.99, 84.46, 81.17, 76.27, 71.01, 61.50, 55.49, 54.08, 37.67, 37.08, 34.27, 33.01, 28.14, 25.83, 23.97, 15.70; HRMS (ESI) calcd for C31H42N5O8S (M+H+) 644.2754, found 644.2767.

*N*-[3-[6-(piperidin-1-yl)-1,3-dioxo-1*H*-benzo[*de*]isoquinolin-2(3*H*)-yl]propyl]-2-[[2-[[(propylamino)carbonyl]amino]-β-D-glucopyranosyl]thio]acetamide (**17b**): yellow solid; (0.49 g, 74.5 %) yield; [α]D25 -23.9 (c=0.1, DMSO); 1H NMR (300 MHz, DMSO-*d*6) δ 8.49 – 8.32 (m, 3H, ArH), 7.91 (t, *J* = 5.6 Hz, 1H, NH), 7.77 (dd, *J* = 8.3, 7.4 Hz, 1H, ArH), 7.27 (d, *J* = 8.2 Hz, 1H, ArH), 5.85 (t, *J* = 5.6 Hz, 1H, NH), 5.78 (d, *J* = 8.8 Hz, 1H, NH), 4.99 (s, 2H, 2 OH), 4.48 (d, *J* = 10.1 Hz, 1H, H-1), 4.03 (t, *J* = 7.1 Hz, 2H, H-3, H-4), 3.69 (d, *J* = 10.7 Hz, 1H, H-6b), 3.53 – 3.25 (m, 5H, H-6a, H-2, H-5, SCH2), 3.19 – 3.02 (m, 8H, 4 CH2), 2.96 – 2.82 (m, 2H, CH2), 1.85 – 1.72 (m, 6H, 3 CH2), 1.70 – 1.56 (m, 2H, CH2), 1.38 – 1.28 (m, 2H, CH2), 0.78 (t, *J* = 7.4 Hz, 3H, CH3); 13C NMR (75 MHz, DMSO-*d*6) δ 169.16, 163.69, 163.14, 158.15, 156.79, 132.35, 130.66, 130.62, 129.23, 125.82, 125.49, 122.53, 115.02, 114.93, 84.44, 81.15, 76.31, 71.02, 61.51, 55.50, 54.06, 41.33, 37.66, 37.10, 32.97, 28.13, 25.82, 23.96, 23.29, 11.43; HRMS (ESI) calcd for C32H44N5O8S (M+H+) 658.2911, found 658.2902.

*N*-[3-[6-bromo-1,3-dioxo-1*H*-benzo[*de*]isoquinolin-2(3*H*)-yl]propyl]-2-[[2-[[(methylamino)carbonyl]amino]-β-D-glucopyranosyl]thio]acetamide (**17c**): yellow solid; (0.45 g, 72.0 %) yield; [α]D25 -32.5 (c=0.1, DMSO); 1H NMR (300 MHz, DMSO-*d*6) δ 8.43 (dd, *J* = 16.7, 7.9 Hz, 2H, ArH), 8.21 (d, *J* = 7.9 Hz, 1H, ArH), 8.09 (d, *J* = 7.9 Hz, 1H, ArH), 7.96 (t, *J* = 5.7 Hz, 1H, NH), 7.93 – 7.85 (m, 1H, ArH), 5.96 (d, *J* = 8.7 Hz, 1H, NH), 5.82 (d, *J* = 4.5 Hz, 1H, NH), 4.57 (br s, 3H, 3 OH), 4.48 (d, *J* = 10.1 Hz, 1H, H-1), 4.04 – 3.96 (m, 2H, H-3, H-4), 3.69 (d, *J* = 10.9 Hz, 1H, H-6b), 3.48 – 3.34 (m, 2H, H-2, H-6a), 3.34 – 3.18 (m, 3H, H-5, SCH2), 3.16 – 3.05 (m, 4H, 2 CH2), 2.56 – 2.52 (m, 3H, NCH3), 1.81 – 1.75 (m, 2H, CH2); 13C NMR (75 MHz, DMSO-*d*6) δ 169.22, 162.98, 162.93, 158.68, 132.62, 131.62, 131.37, 131.00, 129.81, 129.19, 128.79, 128.30, 122.77, 121.99, 84.44, 81.12, 76.23, 70.98, 61.50, 55.58, 38.08, 37.09, 33.06, 27.93, 26.51; HRMS (ESI) calcd for C25H30BrN4O8S (M+H+) 625.0968, found 625.0949.

*N*-[3-[6-bromo-1,3-dioxo-1*H*-benzo[*de*]isoquinolin-2(3*H*)-yl]propyl]-2-[[2-[[(ethylamino)carbonyl]amino]-β-D-glucopyranosyl]thio]acetamide (**17d**): yellow solid; (0.45 g, 70.4 %) yield; [α]D25 -16.2 (c=0.1, DMSO); 1H NMR (300 MHz, DMSO-*d*6) δ 8.45 (d, *J* = 7.2 Hz, 1H, ArH), 8.39 (d, *J* = 8.4 Hz, 1H, ArH), 8.20 (d, *J* = 7.9 Hz, 1H, ArH), 8.09 (d, *J* = 7.9 Hz, 1H, ArH), 8.01 – 7.83 (m, 2H, ArH, NH), 5.90 – 5.81 (m, 2H, 2 NH), 4.48 (d, *J* = 10.1 Hz, 1H, H-1), 4.42 (s, 3H, 3 OH), 4.06 – 3.95 (m, 2H, H-3, H-4), 3.69 (d, *J* = 10.8 Hz, 1H, H-6b), 3.50 – 3.34 (m, 3H, H-2, H-6a, H-5), 3.30 – 3.20 (m, 2H, SCH2), 3.19 – 3.09 (m, 4H, 2 CH2), 3.03 – 2.93 (m, 2H, CH2), 1.87 – 1.73 (m, 2H, CH2), 0.95 (t, *J* = 7.2 Hz, 3H, CH3); 13C NMR (75 MHz, DMSO-*d*6) δ 169.23, 162.96, 162.91, 158.05, 132.62, 131.62, 131.36, 131.00, 129.80, 129.19, 128.79, 128.28, 122.75, 121.97, 84.49, 81.13, 76.26, 71.02, 61.51, 55.49, 38.07, 37.10, 34.29, 33.05, 27.93, 15.69; HRMS (ESI) calcd for C26H32BrN4O8S (M+H+) 639.1124, found 639.1112.

**2. The supplementary** **MD simulations studies.**

In order to further investigate the binding modes of **10a**, **10d** and **16j** with hOGA, we extended the MD simulations of the three systems by 20 ns. As shown in **Figure S1a**, 45 ns of MD simulations were implemented, the dynamic convergences of these three systems were all achieved after 22 ns of simulations. Then, the conformations of **10a**, **10d** and **16j** in complex with hOGA at 45 ns of MD simulations were extracted and superposed with the conformations at 25 ns, respectively (**Figures S1b-1d**). These results show that the conformations of **10a**, **10d** and **16j** exhibit small change in the MD simulations of 25 ns and 45 ns.


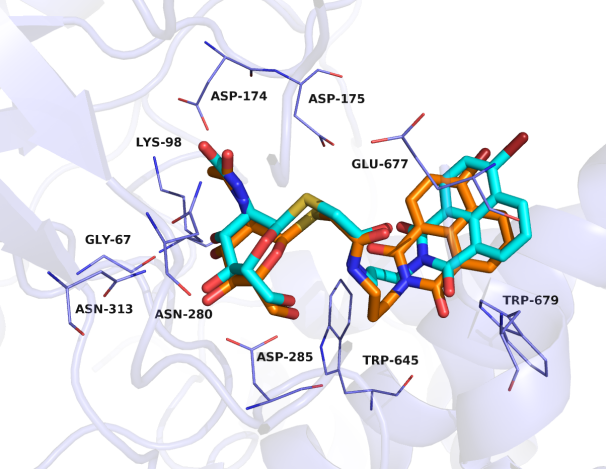


**(b)**

**(a)**


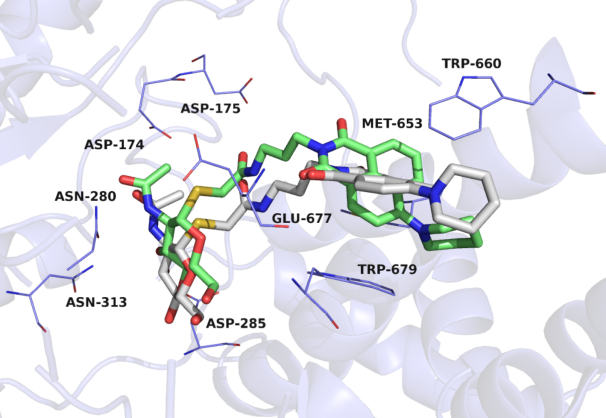

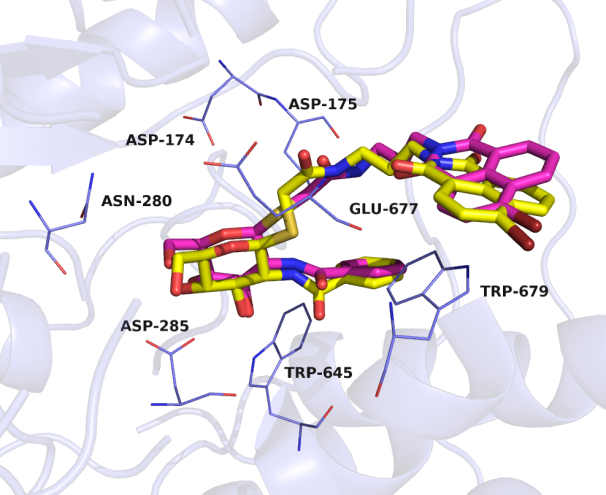


**(d)**

**(c)**

**Figure S1.** (a) RMSD changes of hOGA in complex with **10a**, **10d**,and **16j** during 45 ns. (b) Superimposition of conformations of **10a** in hOGA active pocket at 25 ns (cyan colored carbon atoms) and 45 ns (orange colored carbon atoms) MD simulations. (c) Superimposition of conformations of **10d** in hOGA active pocket at 25 ns (green colored carbon atoms) and 45 ns (white colored carbon atoms) MD simulations. (d) Superimposition of conformations of **16j** in hOGA active pocket at 25 ns (yellow colored carbon atoms) and 45 ns (pink colored carbon atoms) MD simulations.

**References**

1. Shen, S.; Dong, L.; Chen, W.; Zeng, X.; Lu, H.; Yang, Q.; Zhang, J., Modification of the thioglycosyl-naphthalimides as potent and selective human O-GlcNAcase Inhibitors. *ACS Med. Chem. Lett.* **2018,** *9* (12), 1241-1246.

2. Shen, S.; Chen, W.; Dong, L.; Yang, Q.; Lu, H.; Zhang, J., Design and synthesis of naphthalimide group-bearing thioglycosides as novel β-N-acetylhexosaminidases inhibitors. *J. Enzyme Inhib. Med. Chem.* **2018,** *33* (1), 445-452.

3. Kong, H.; Chen, W.; Lu, H.; Yang, Q.; Dong, Y.; Wang, D.; Zhang, J., Synthesis of NAG-thiazoline-derived inhibitors for β-N-acetyl-D-hexosaminidases. *Carbohydr. Res.* **2015,** *413*, 135-144.

4. Macauley, M. S.; Whitworth, G. E.; Debowski, A. W.; Chin, D.; Vocadlo, D. J., O-GlcNAcase Uses Substrate-assisted Catalysis: kinetic analysis and development of highly selective mechanism-inspired inhibitors. *J. Biol. Chem.* **2005,** *280* (27), 25313-25322.

5. Greig, I. R.; Macauley, M. S.; Williams, I. H.; Vocadlo, D. J., Probing synergy between two catalytic strategies in the glycoside hydrolase O-GlcNAcase using multiple linear free energy relationships. *J. Am. Chem. Soc.* **2009,** *131* (37), 13415-13422.

**1H NMR and 13C NMR spectrum**

**1H NMR spectrum of 9a** **(300 MHz, DMSO-*d6*)**


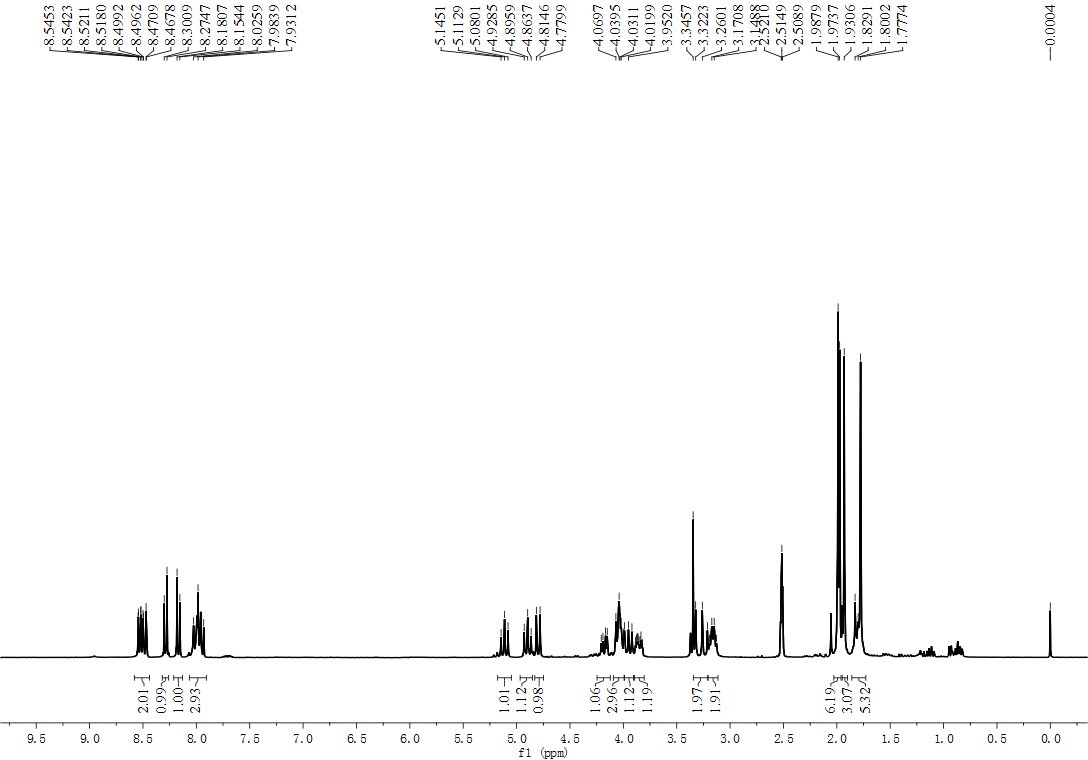


**13C NMR spectrum of 9a (300 MHz, DMSO-*d6*)**


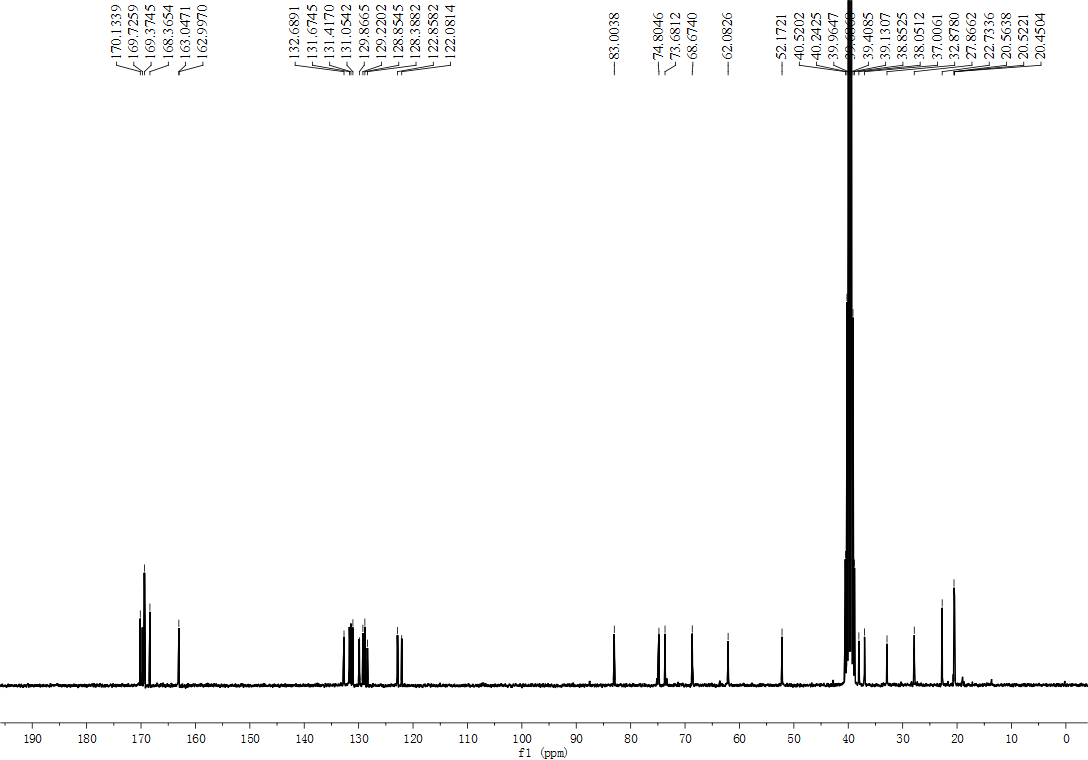


**1H NMR spectrum of 9b (300 MHz, DMSO-*d6*)**


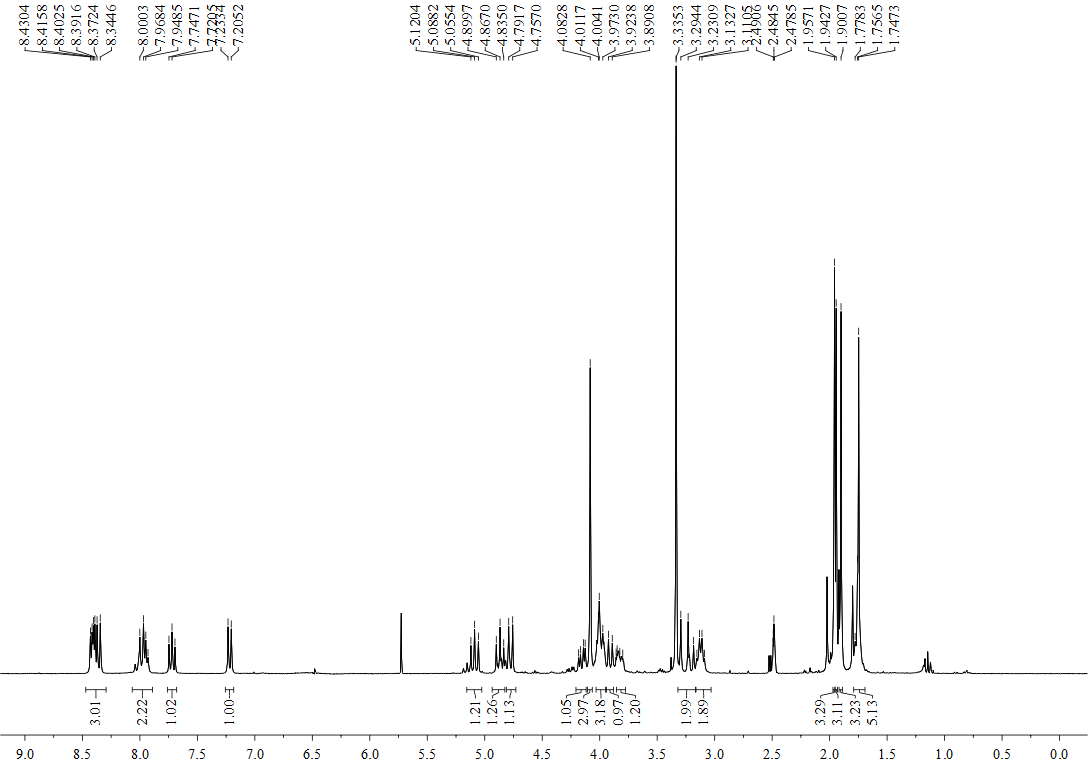


**13C NMR spectrum of 9b (300 MHz, DMSO-*d6*)**


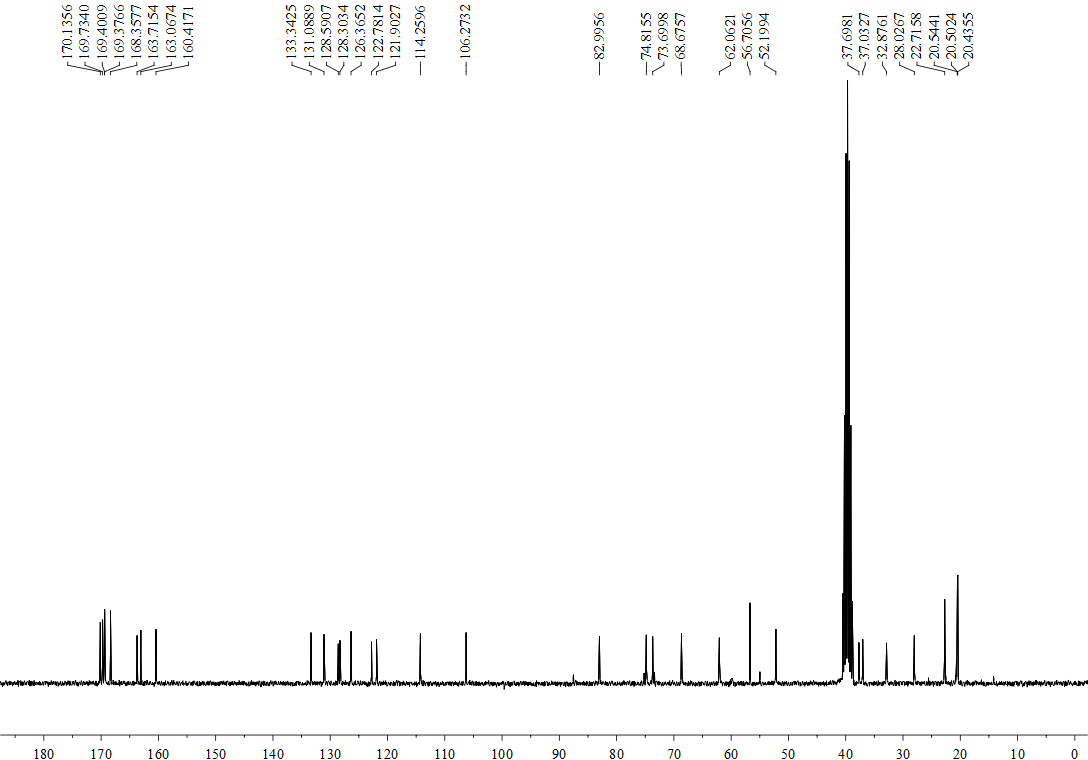


**1H NMR spectrum of 9c (300 MHz, DMSO-*d6*)**


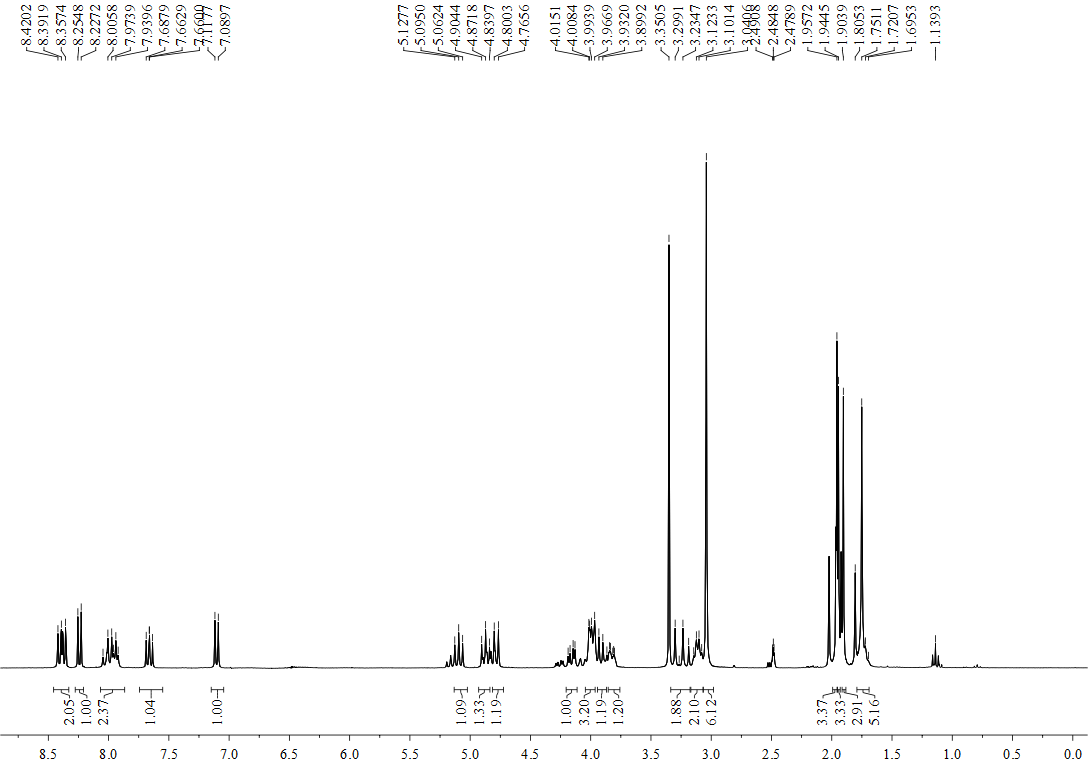


**13C NMR spectrum of 9c (300 MHz, DMSO-*d6*)**


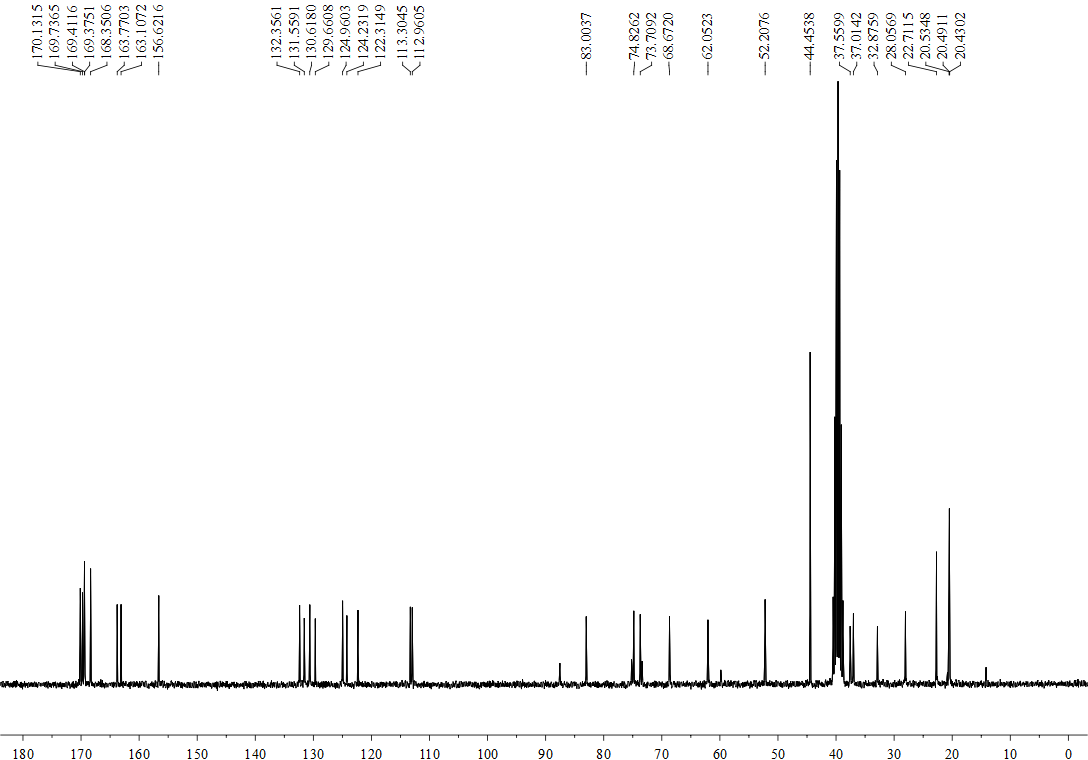


**1H NMR spectrum of 9d (300 MHz, DMSO-*d6*)**


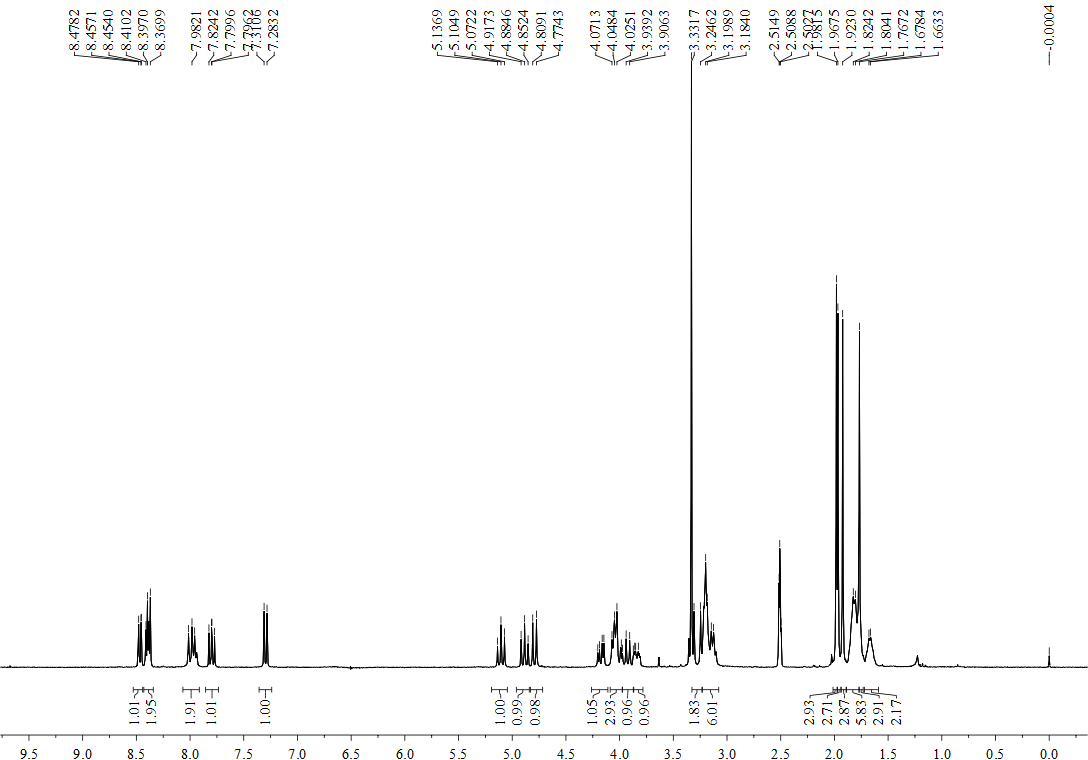


**13C NMR spectrum of 9d (300 MHz, DMSO-*d6*)**


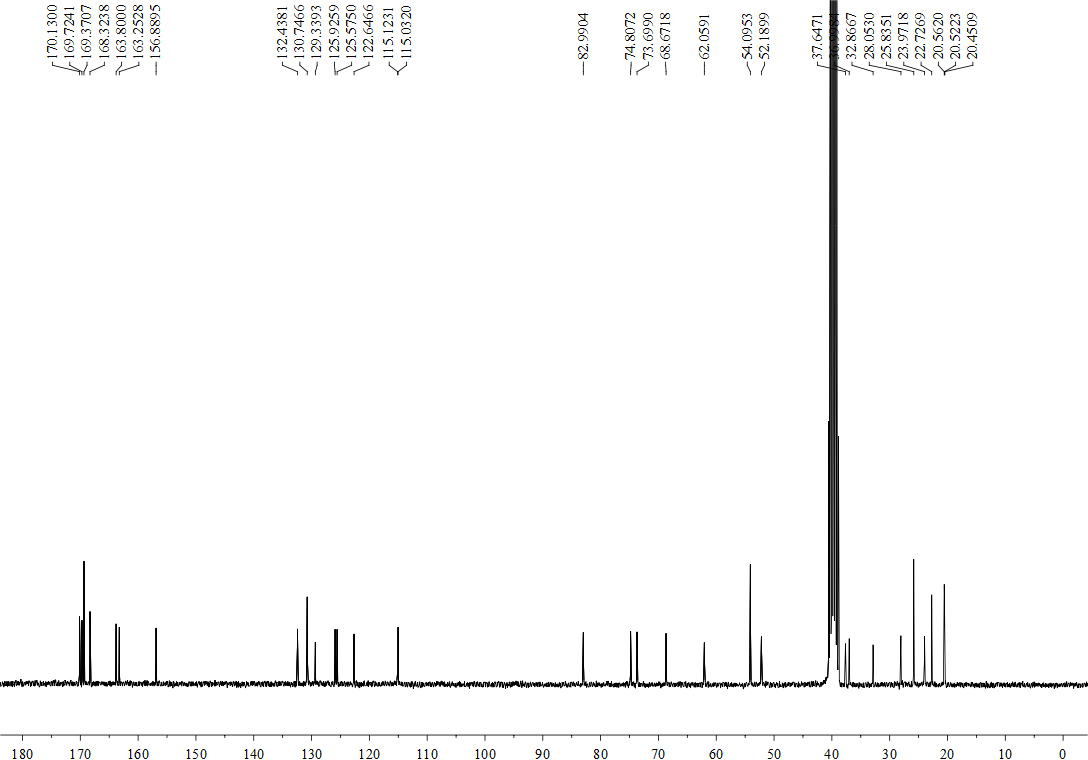


**1H NMR spectrum of 10a (300 MHz, DMSO-*d6*)**


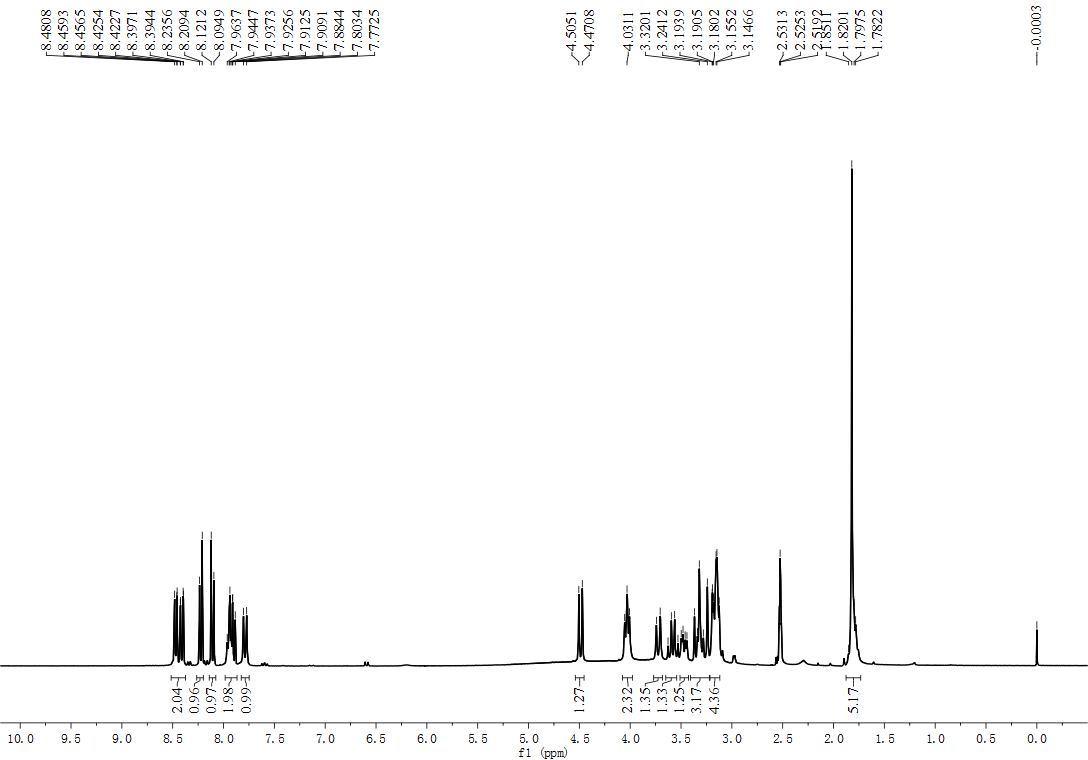


**13C NMR spectrum of 10a (300 MHz, DMSO-*d6*)**


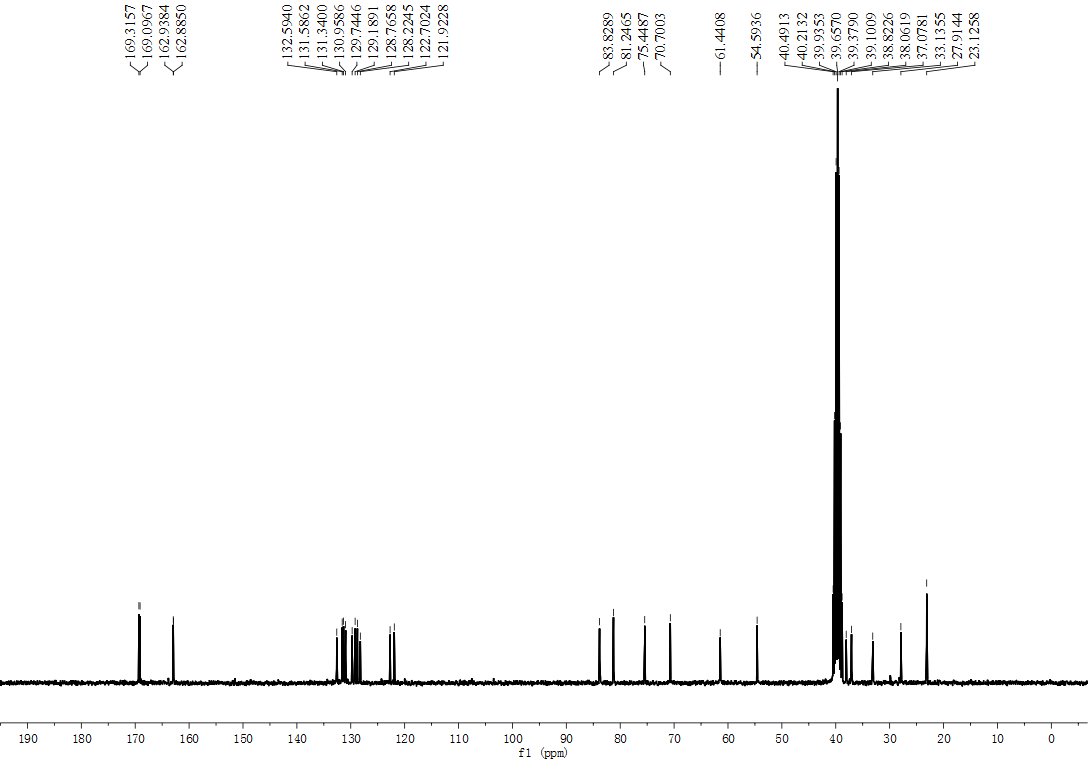


**1H NMR spectrum of 10b (300 MHz, DMSO-*d6*)**


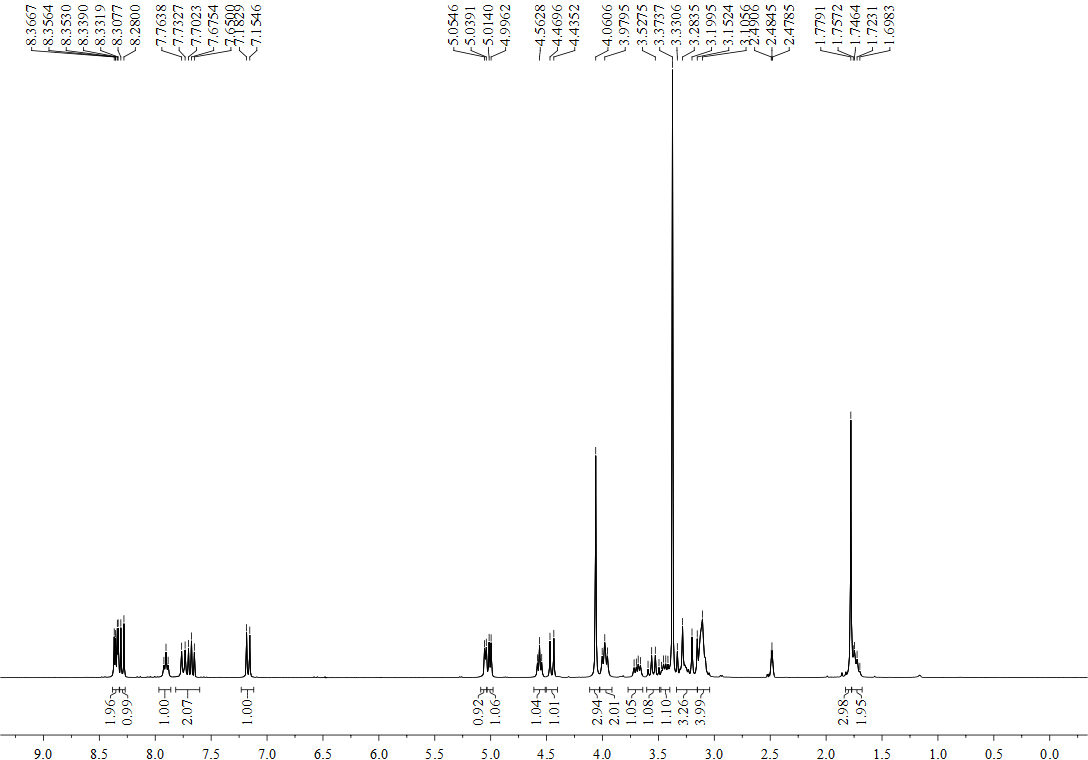


**13C NMR spectrum of 10b (300 MHz, DMSO-*d6*)**


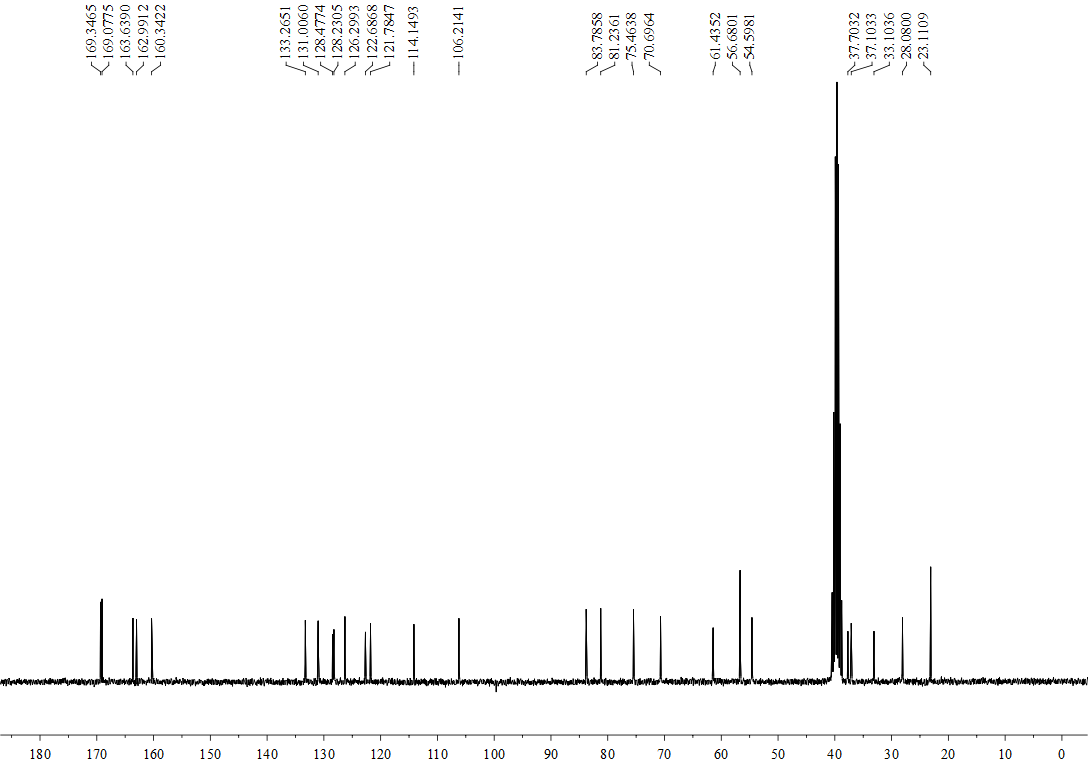


**1H NMR spectrum of 10c (300 MHz, DMSO-*d6*)**


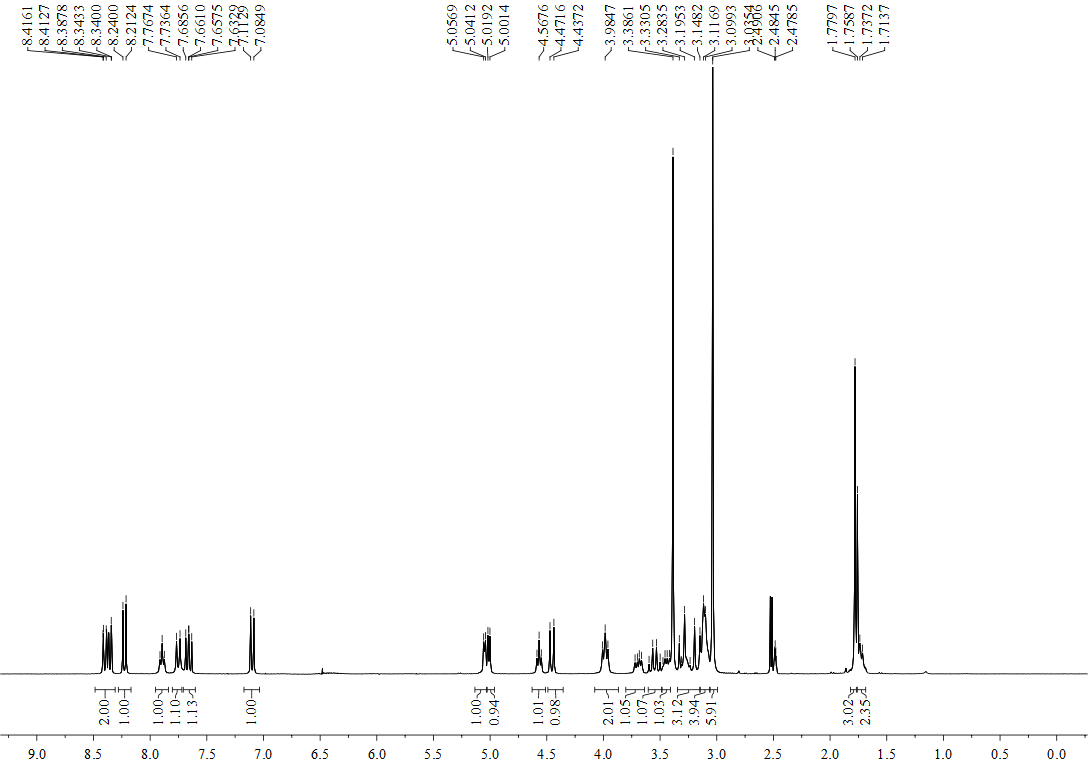


**13C NMR spectrum of 10c (300 MHz, DMSO-*d6*)**


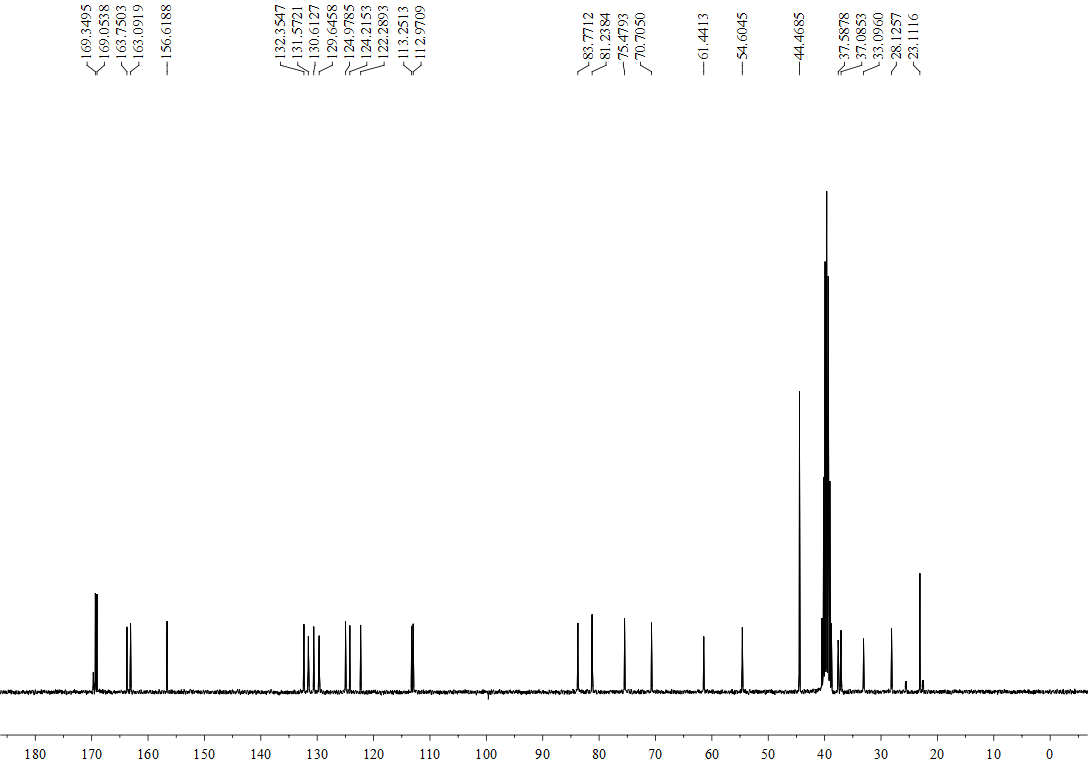


**1H NMR spectrum of 10d (300 MHz, DMSO-*d6*)**


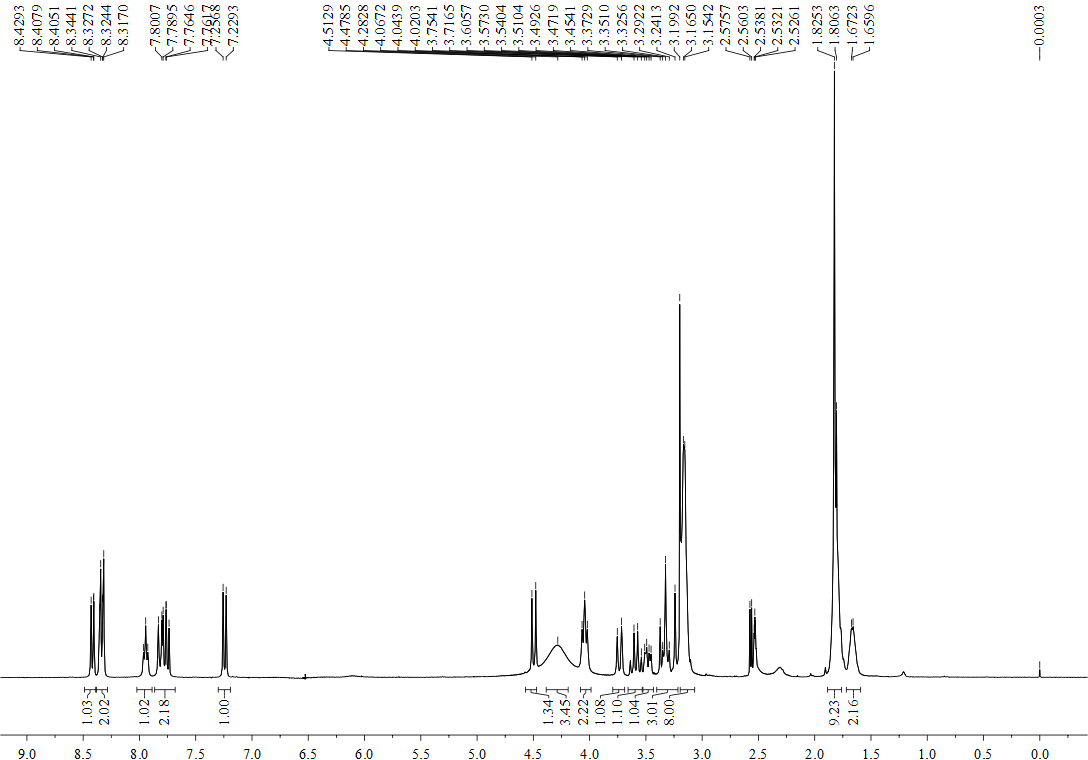


**13C NMR spectrum of 10d (300 MHz, DMSO-*d6*)**


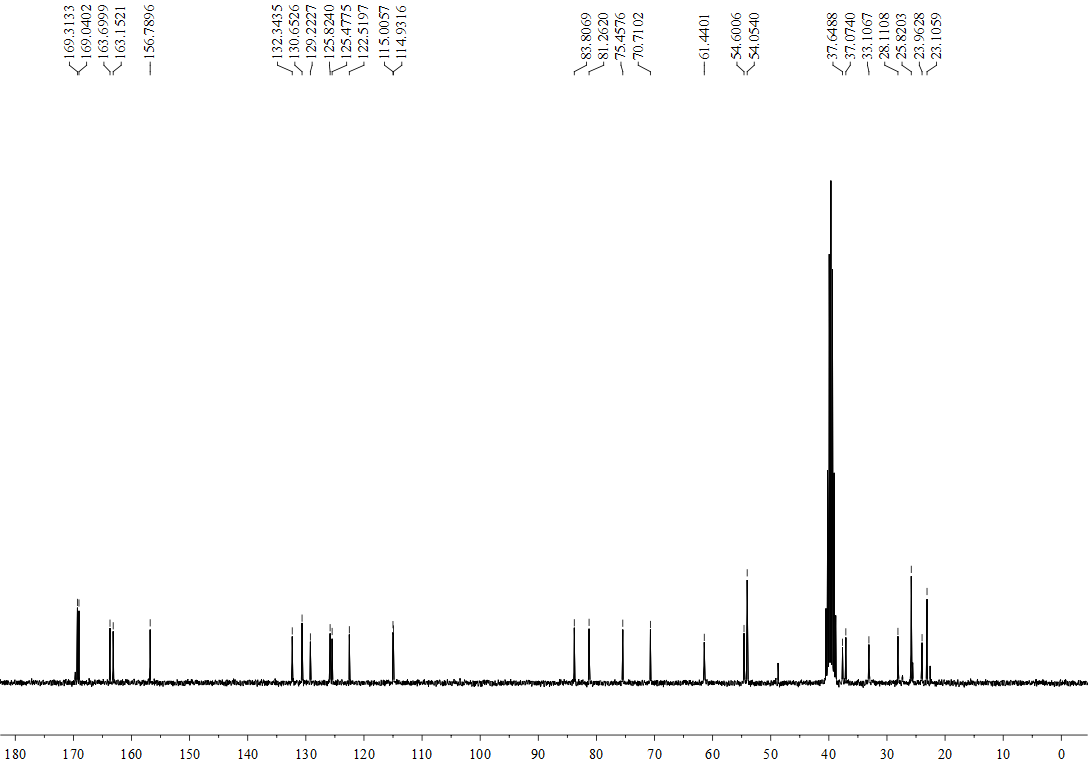


**1H NMR spectrum of 15a (300 MHz, DMSO-*d6*)**


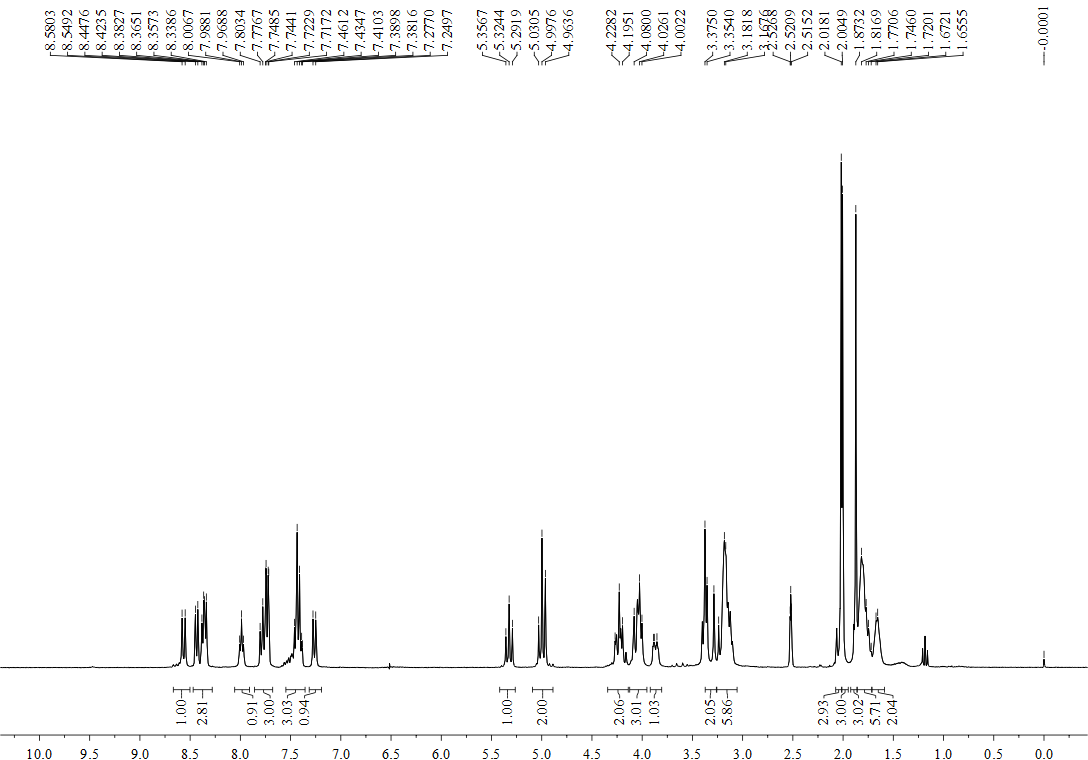


**13C NMR spectrum of 15a (300 MHz, DMSO-*d6*)**


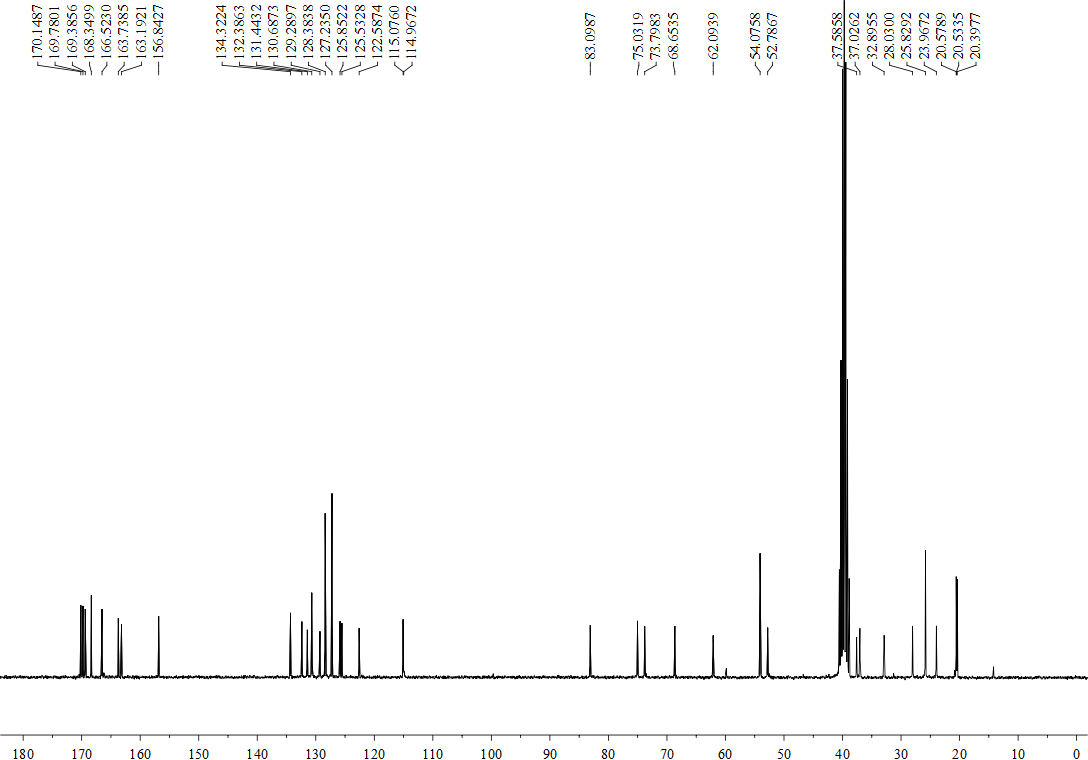


**1H NMR spectrum of 15b (300 MHz, DMSO-*d6*)**


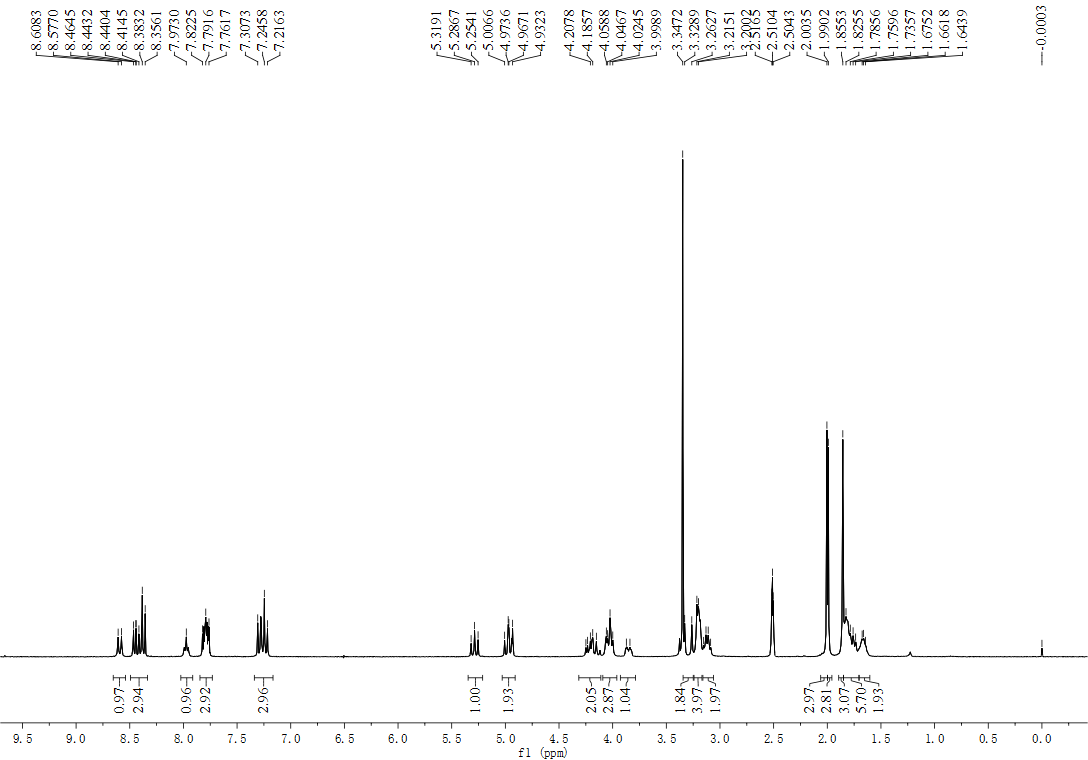


**13C NMR spectrum of 15b (300 MHz, DMSO-*d6*)**


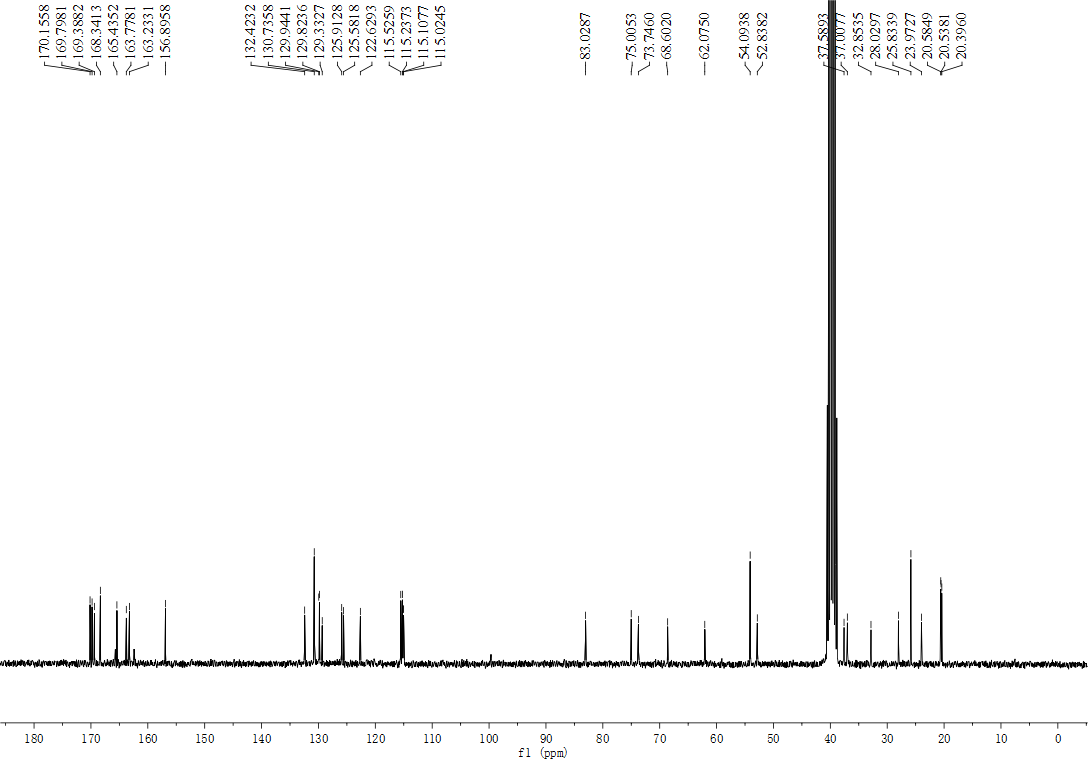


**1H NMR spectrum of 15c (300 MHz, DMSO-*d6*)**


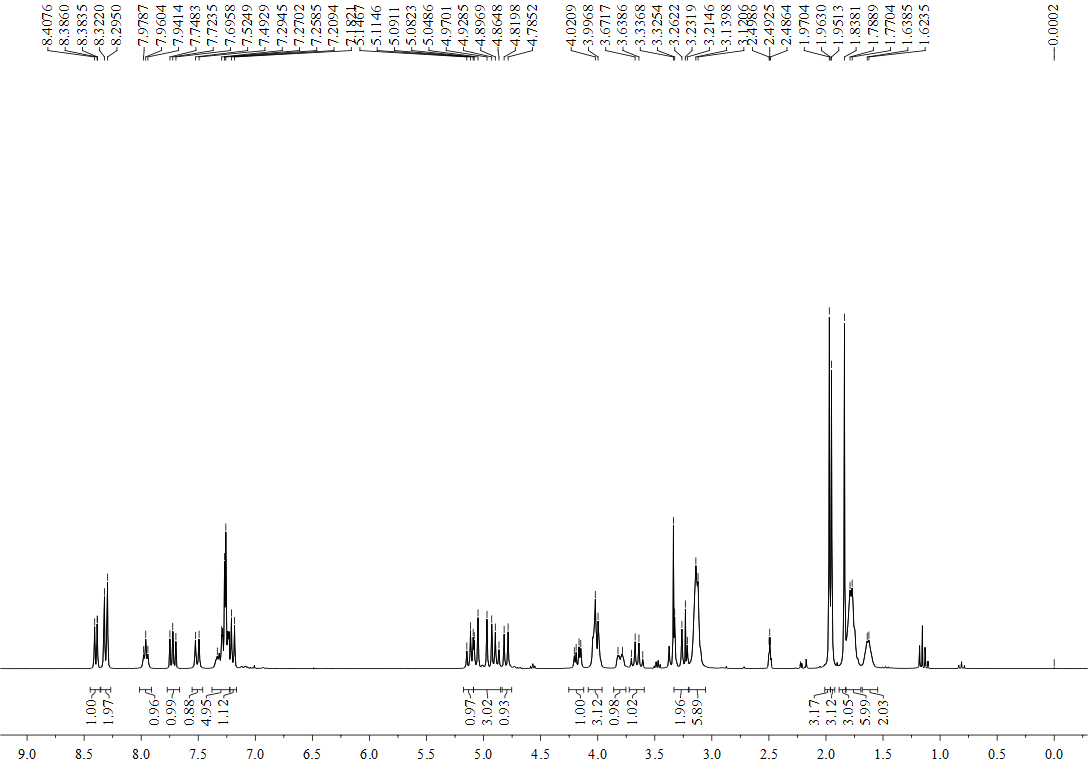


**13C NMR spectrum of 15c (300 MHz, DMSO-*d6*)**


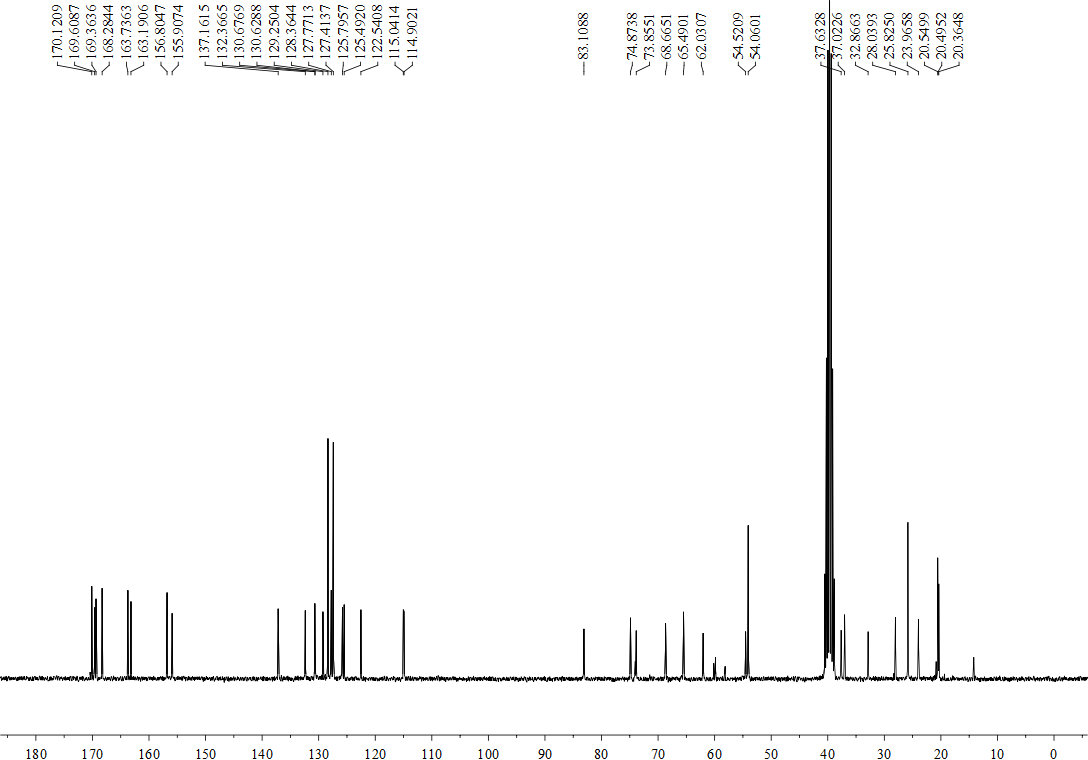


**1H NMR spectrum of 15d (300 MHz, DMSO-*d6*)**


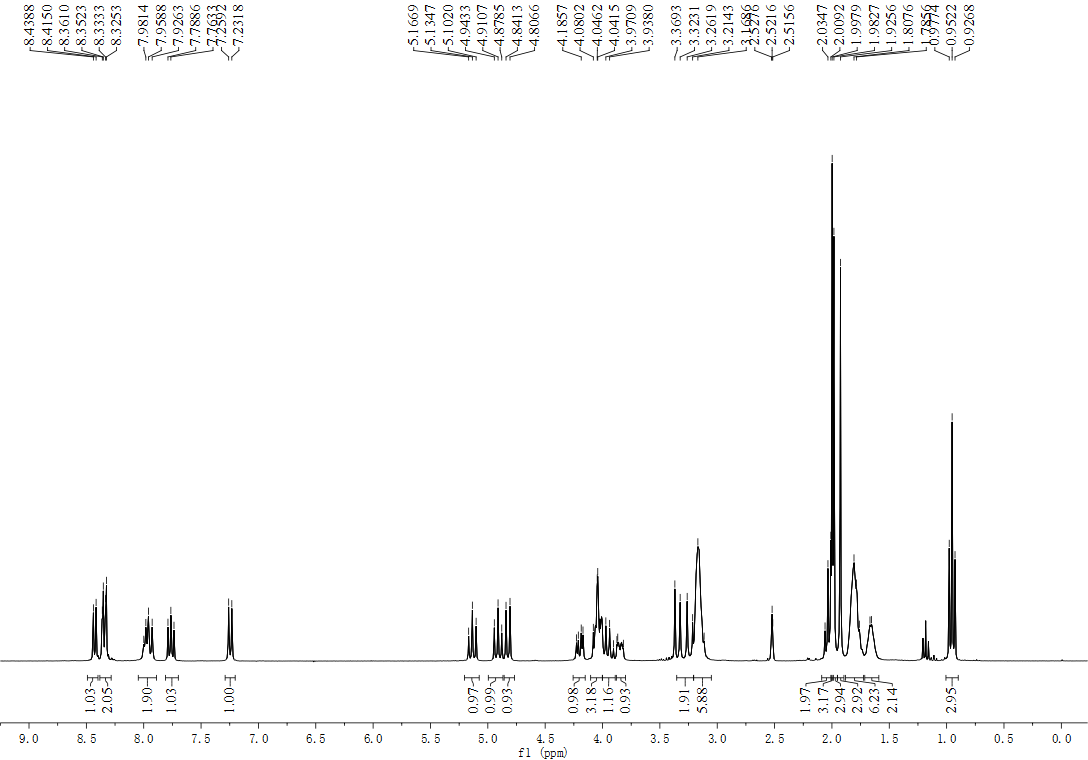


**13C NMR spectrum of 15d (300 MHz, DMSO-*d6*)**


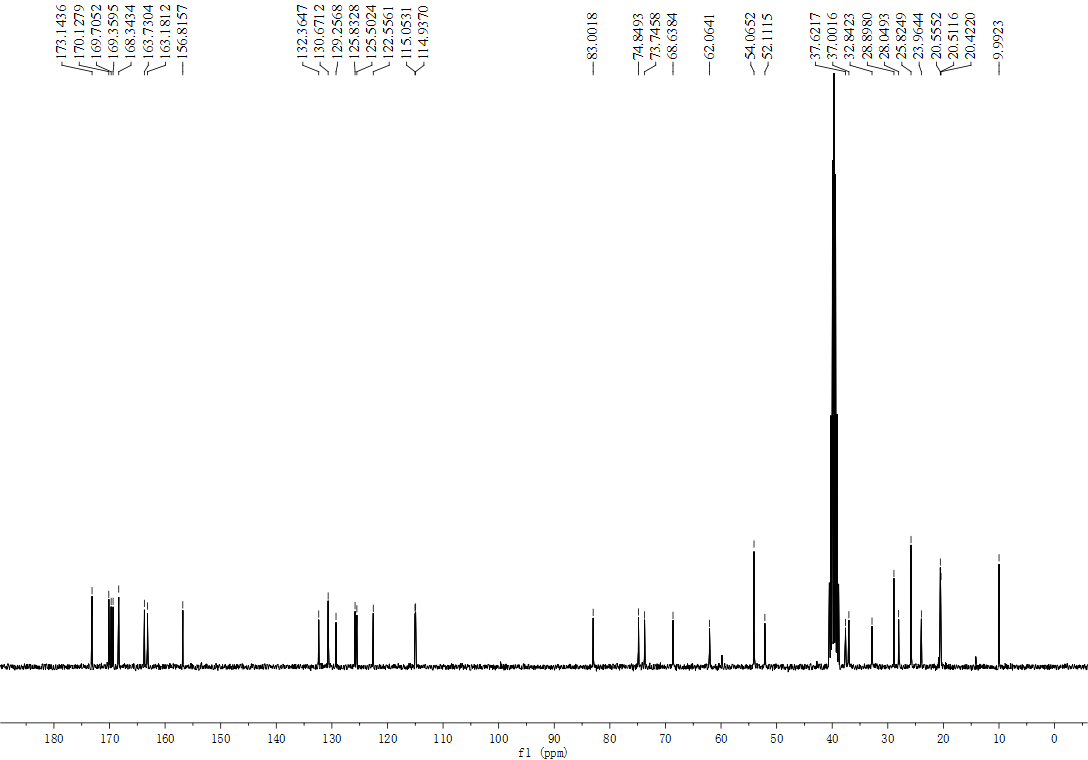


**1H NMR spectrum of 15e (300 MHz, DMSO-*d6*)**


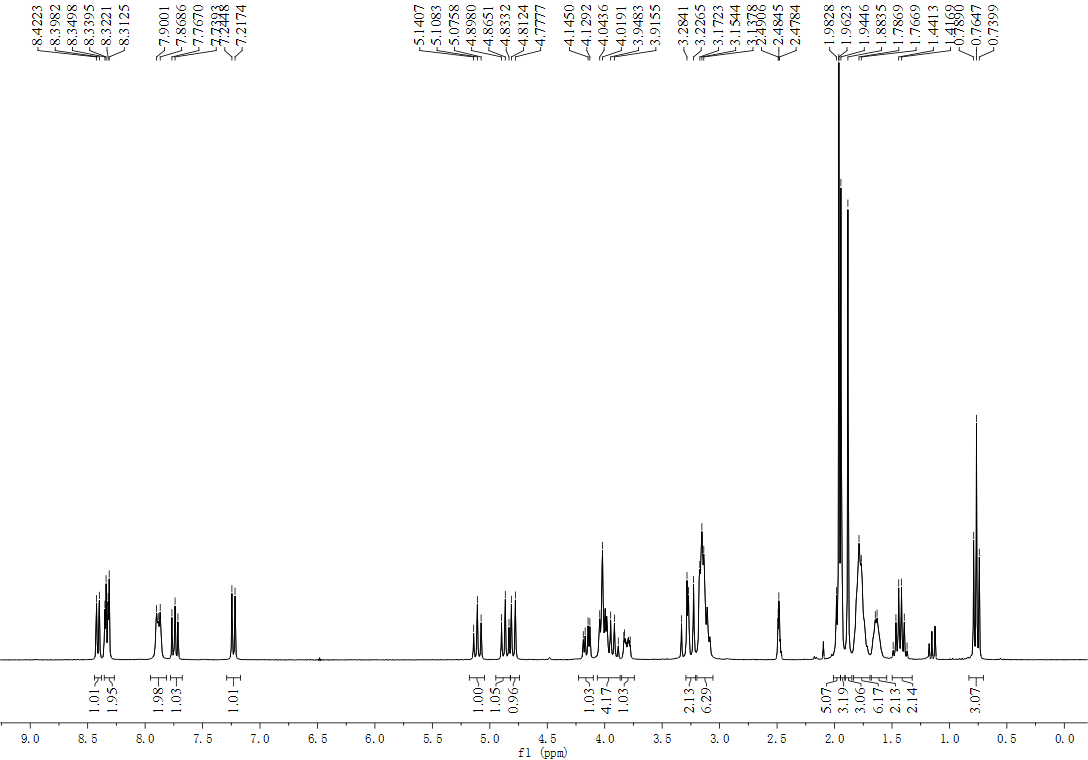


**13C NMR spectrum of 15e (300 MHz, DMSO-*d6*)**


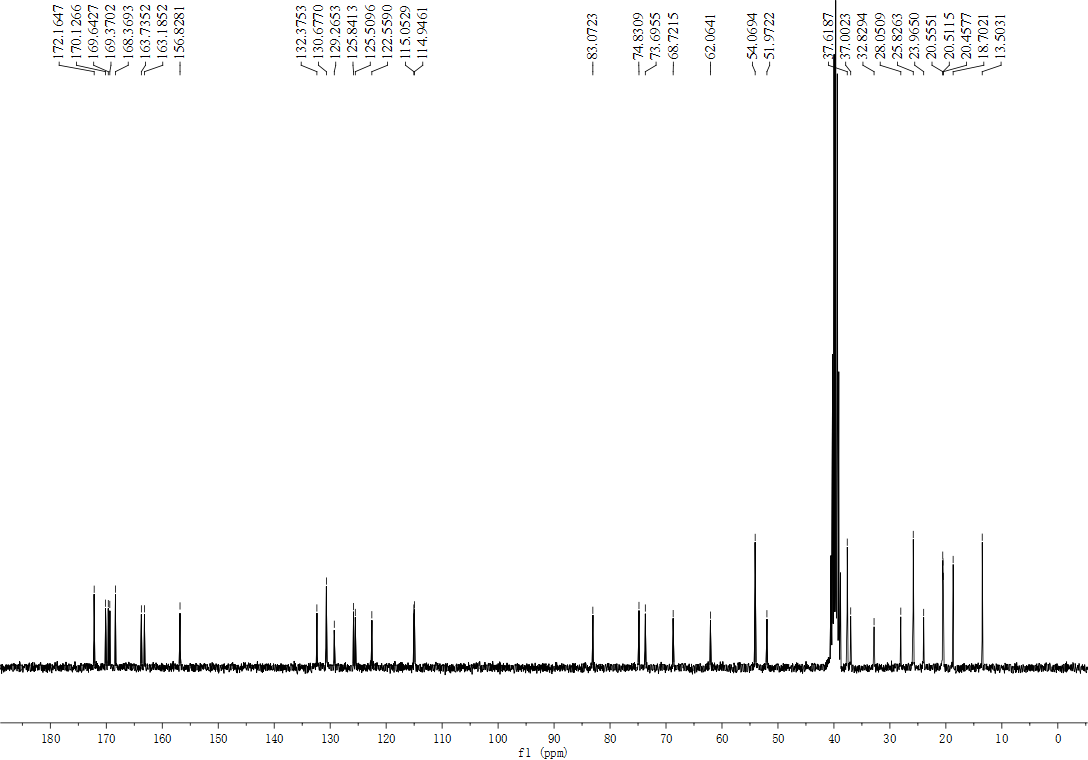


**1H NMR spectrum of 15f (300 MHz, DMSO-*d6*)**


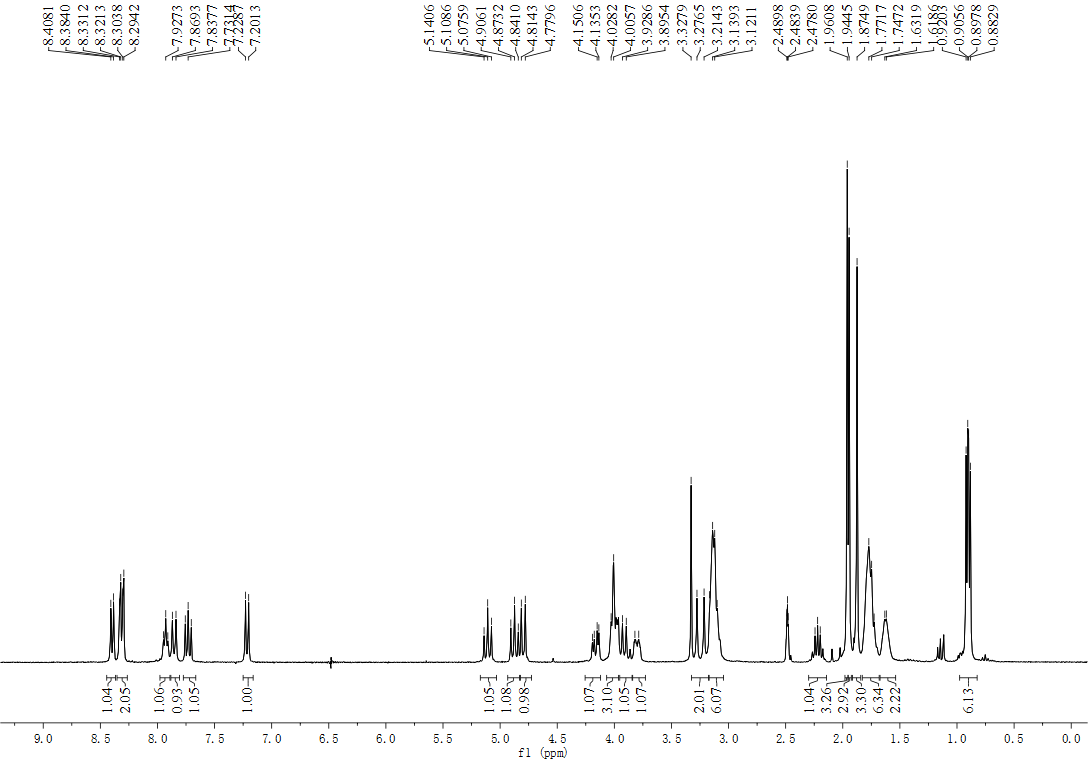


**13C NMR spectrum of 15f (300 MHz, DMSO-*d6*)**


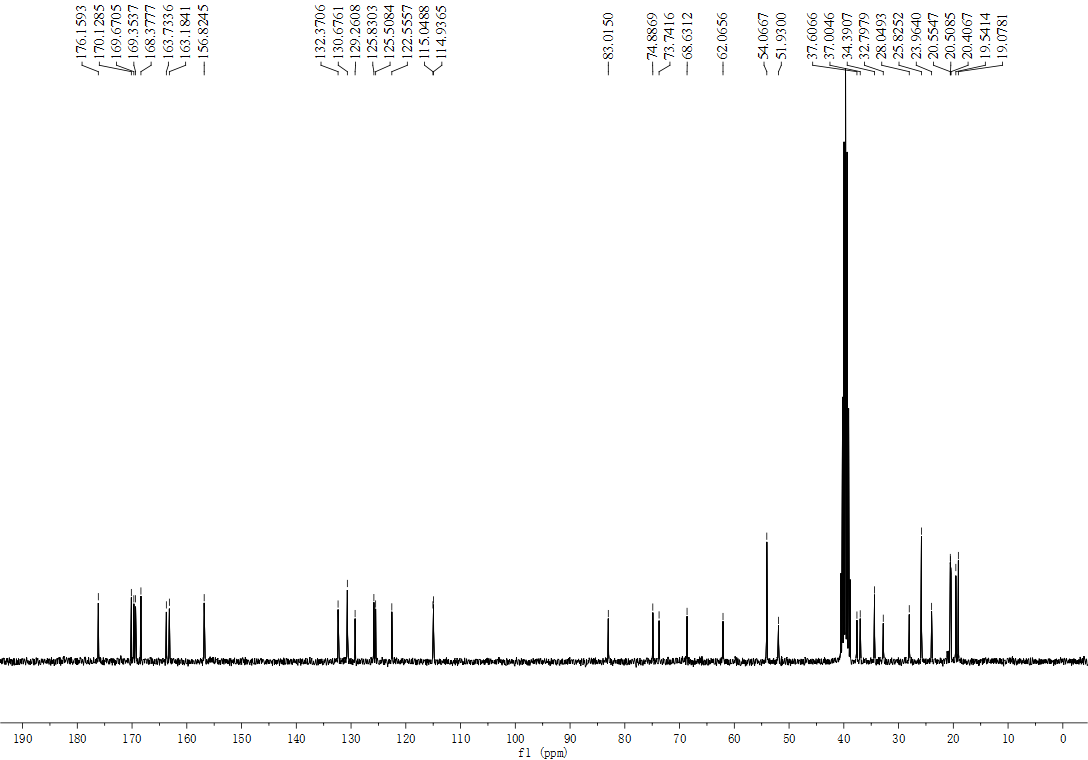


**1H NMR spectrum of 15g (300 MHz, DMSO-*d6*)**


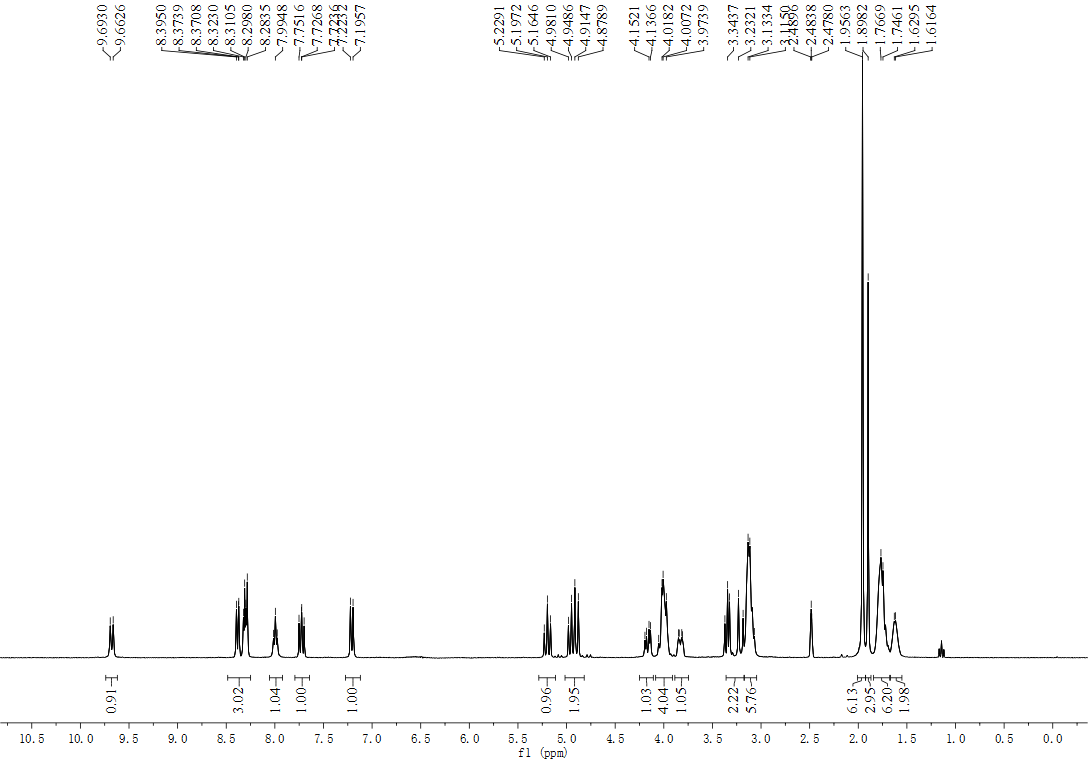


**13C NMR spectrum of 15g (300 MHz, DMSO-*d6*)**


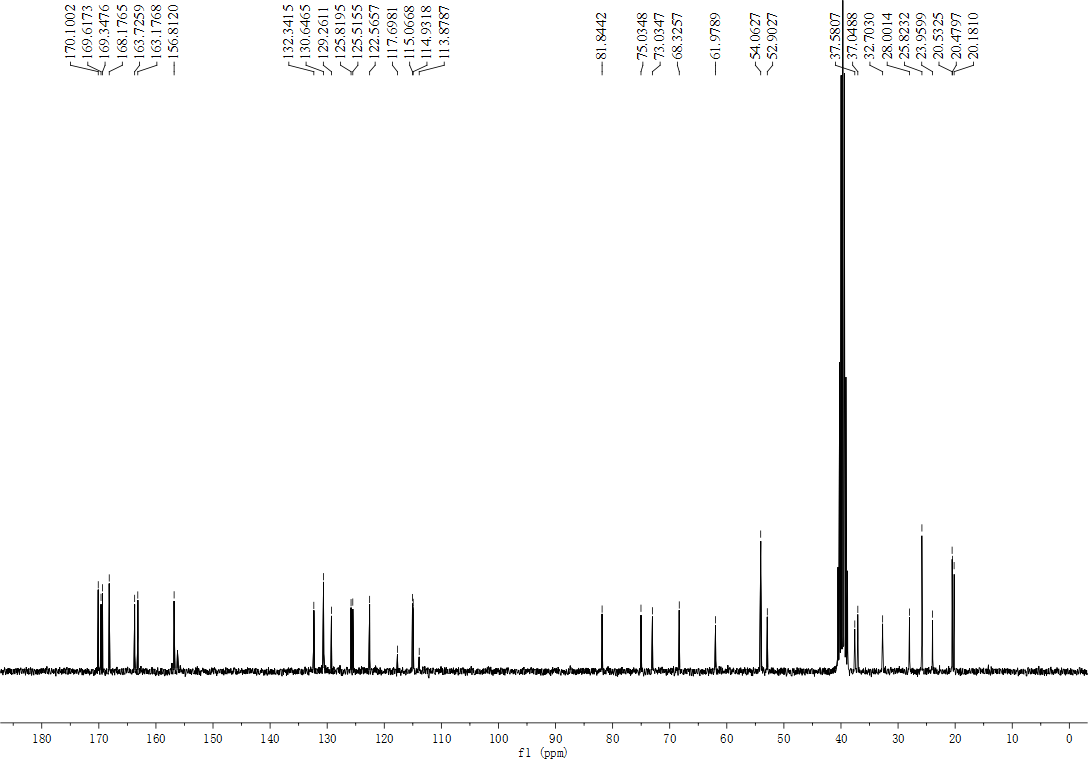


**1H NMR spectrum of 15h (300 MHz, DMSO-*d6*)**


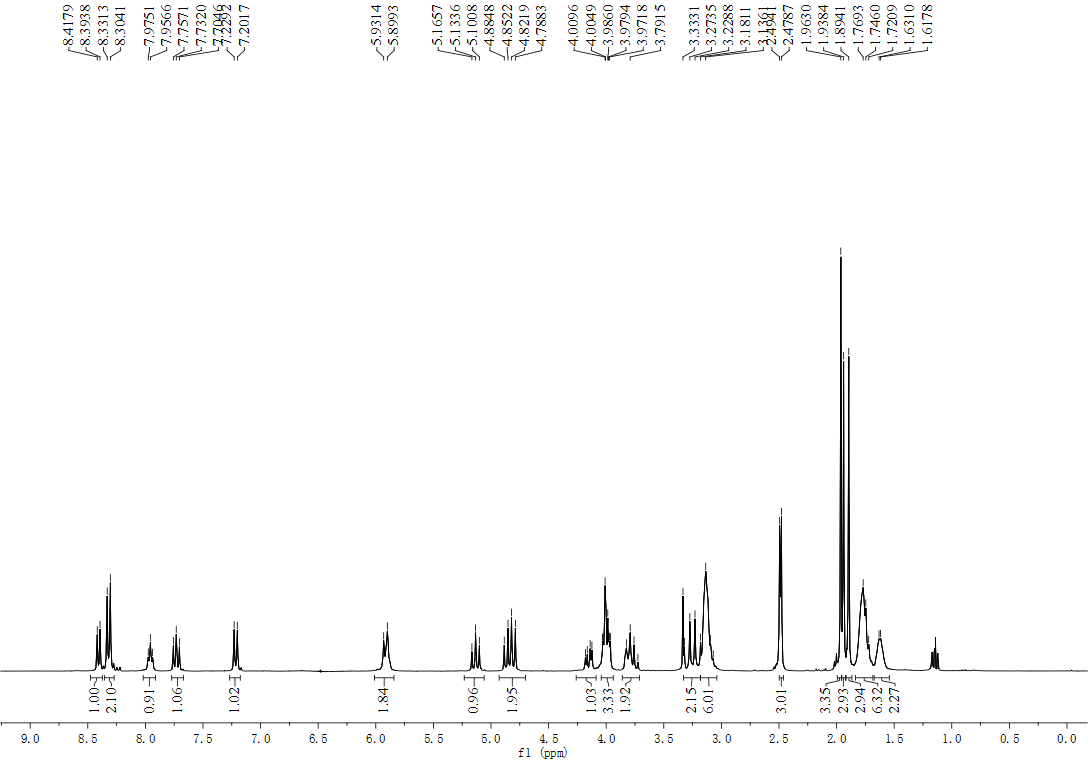


**13C NMR spectrum of 15h (300 MHz, DMSO-*d6*)**


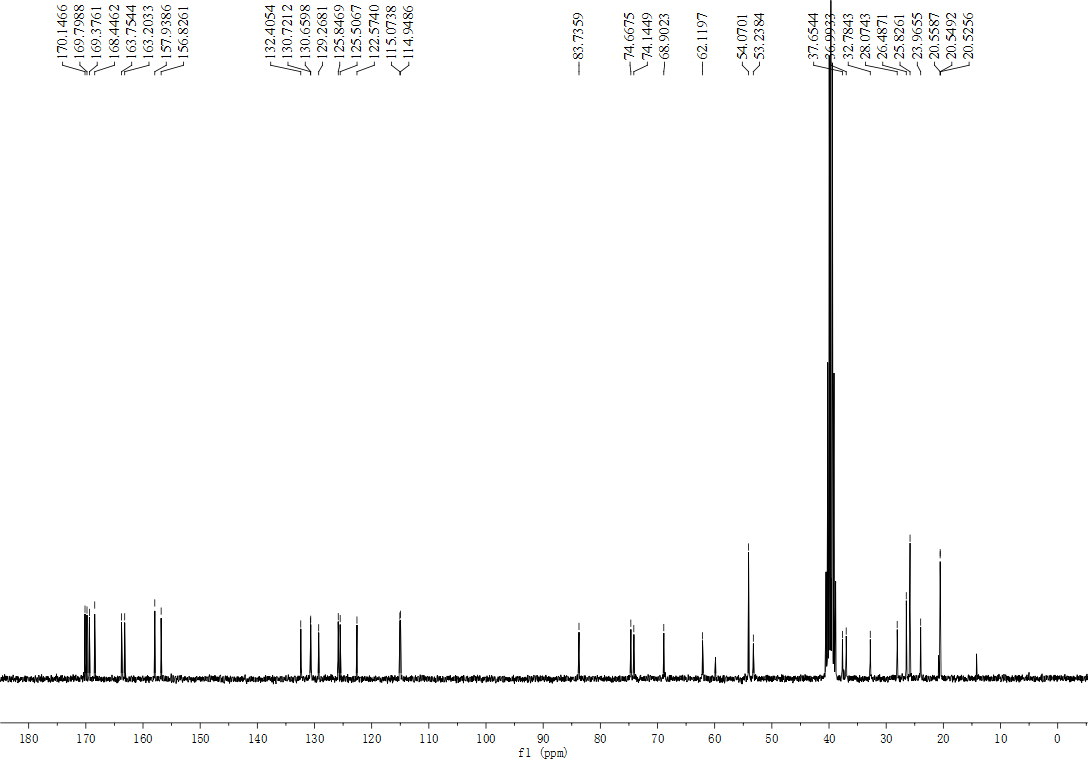


**1H NMR spectrum of 15i (300 MHz, DMSO-*d6*)**


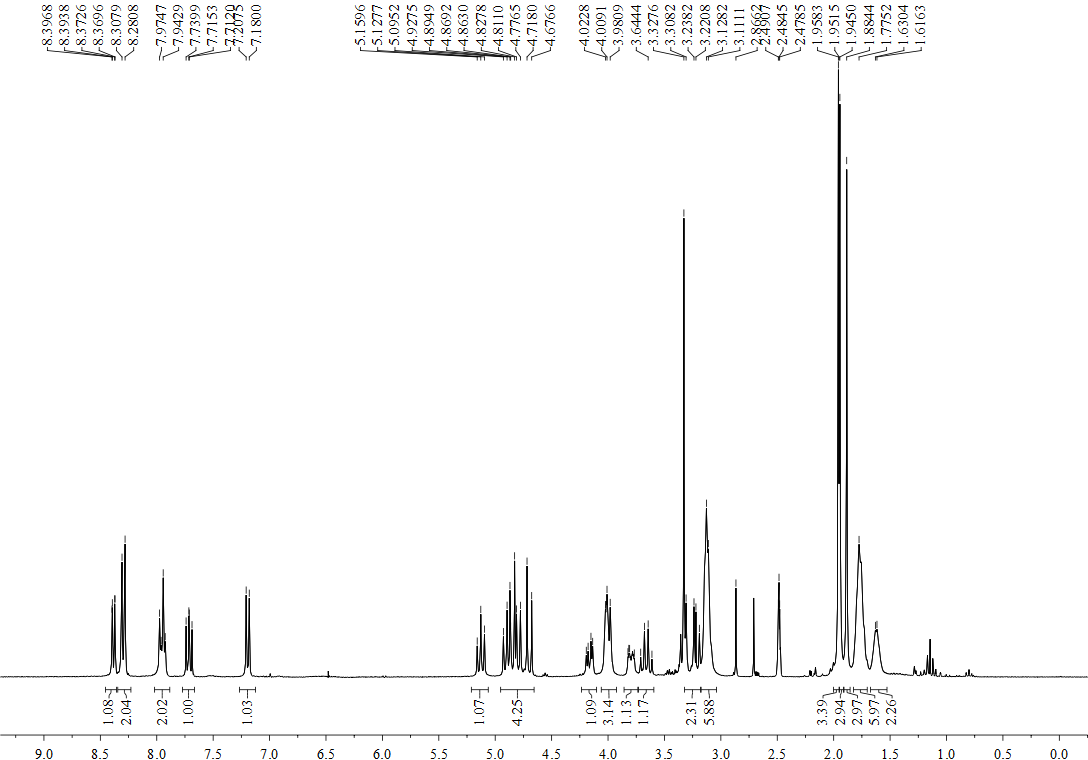


**13C NMR spectrum of 15i (300 MHz, DMSO-*d6*)**


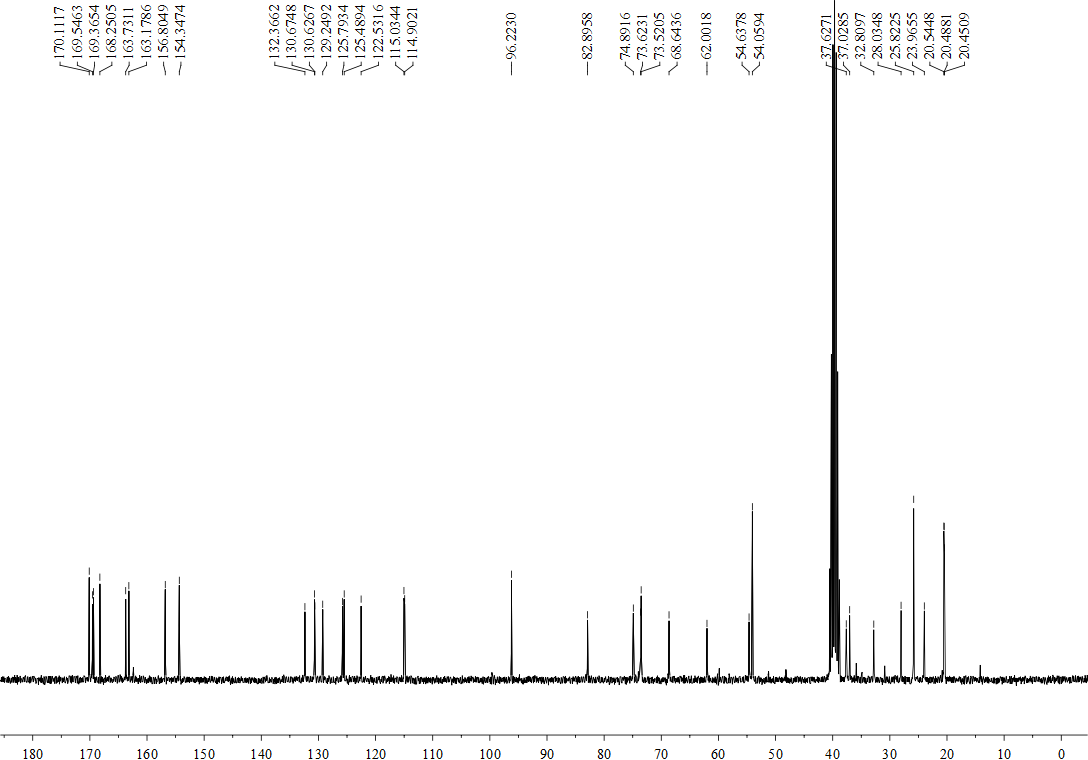


**1H NMR spectrum of 15j (300 MHz, DMSO-*d6*)**


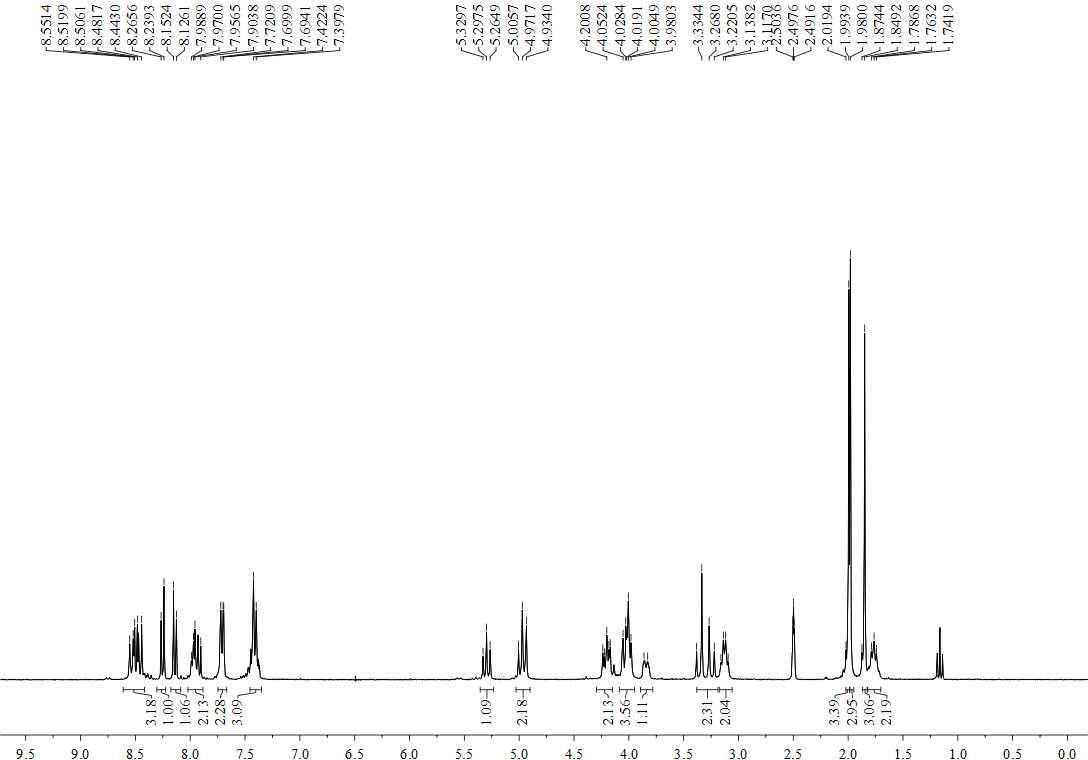


**13C NMR spectrum of 15j (300 MHz, DMSO-*d6*)**


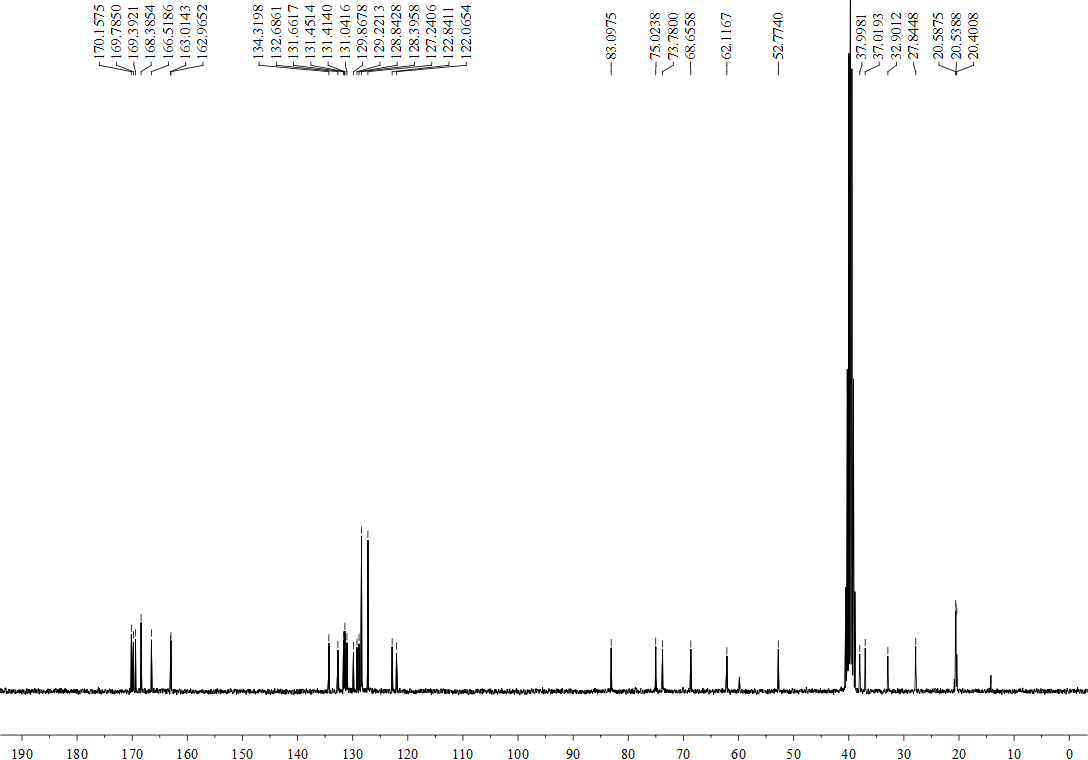


**1H NMR spectrum of 15k (300 MHz, DMSO-*d6*)**


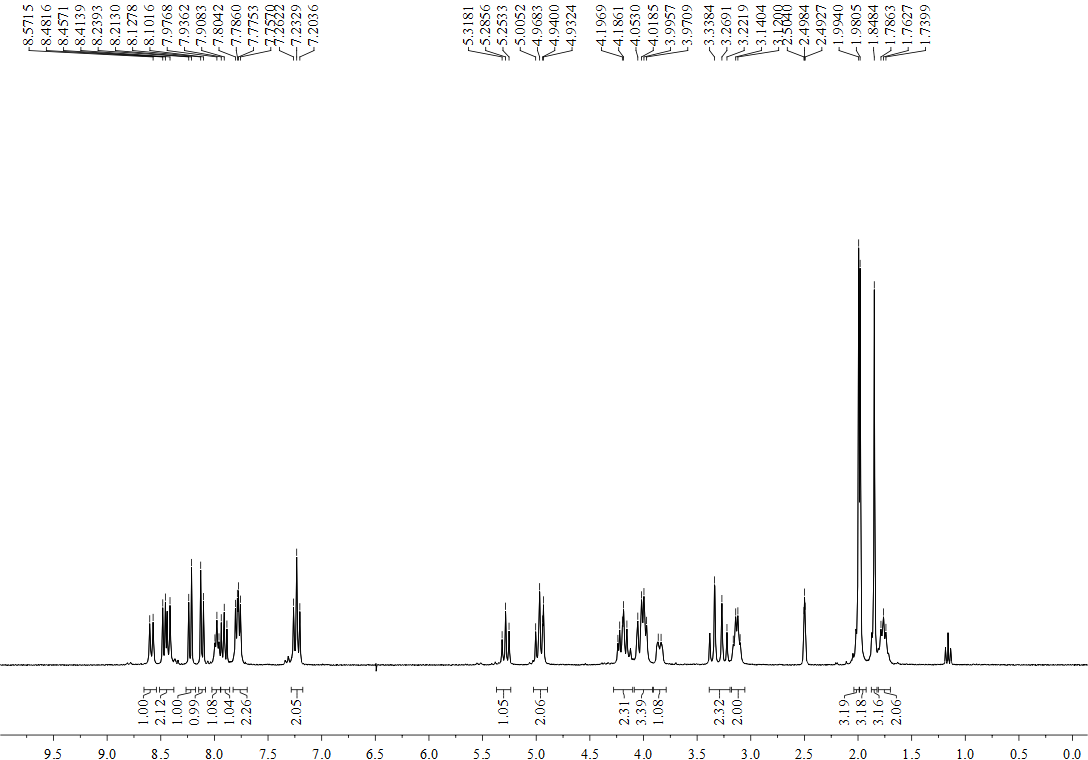


**13C NMR spectrum of 15k (300 MHz, DMSO-*d6*)**


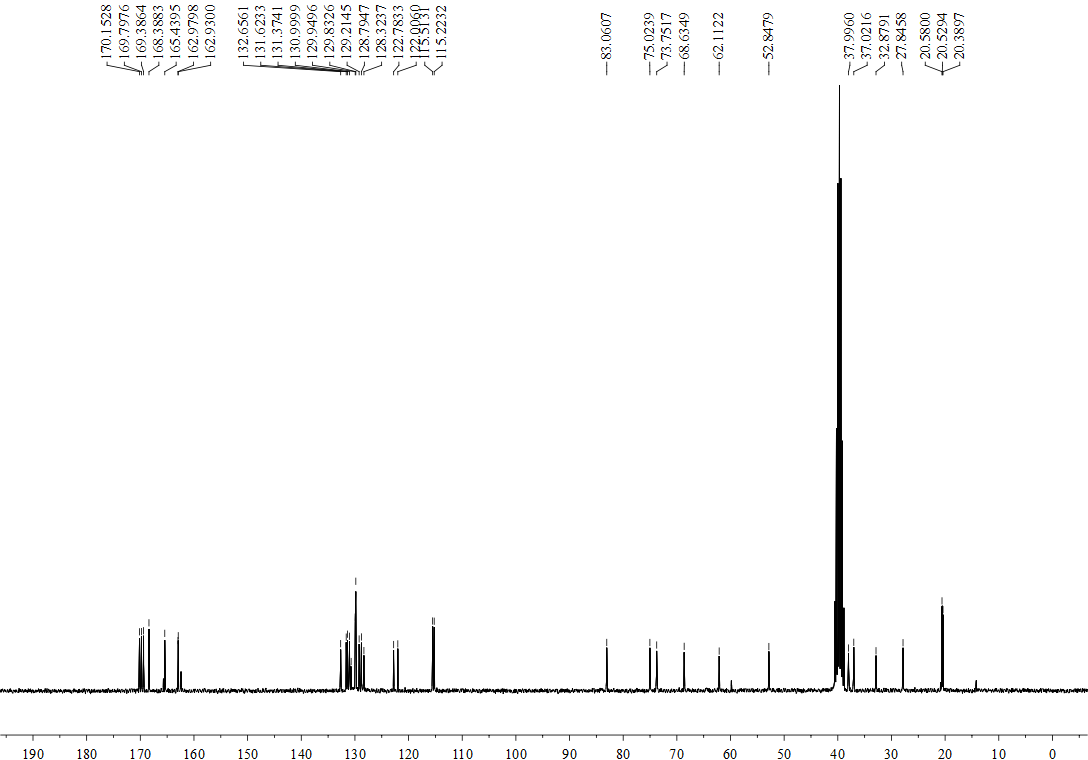


**1H NMR spectrum of 15l (300 MHz, DMSO-*d6*)**


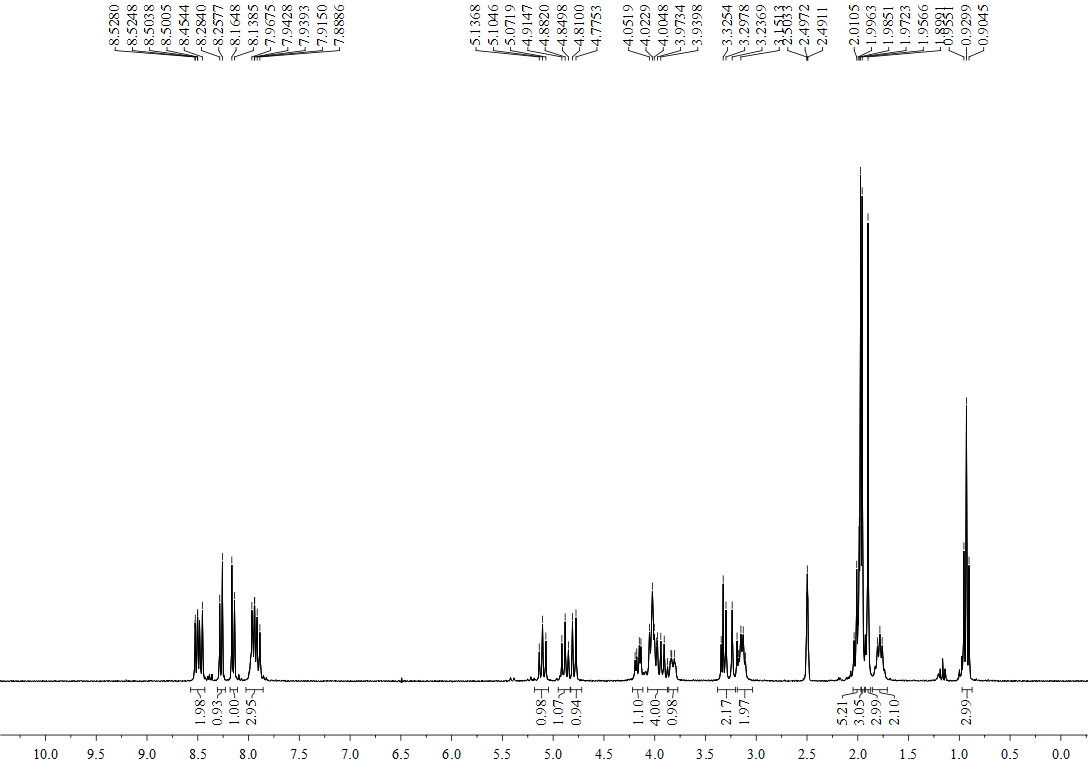


**13C NMR spectrum of 15l (300 MHz, DMSO-*d6*)**


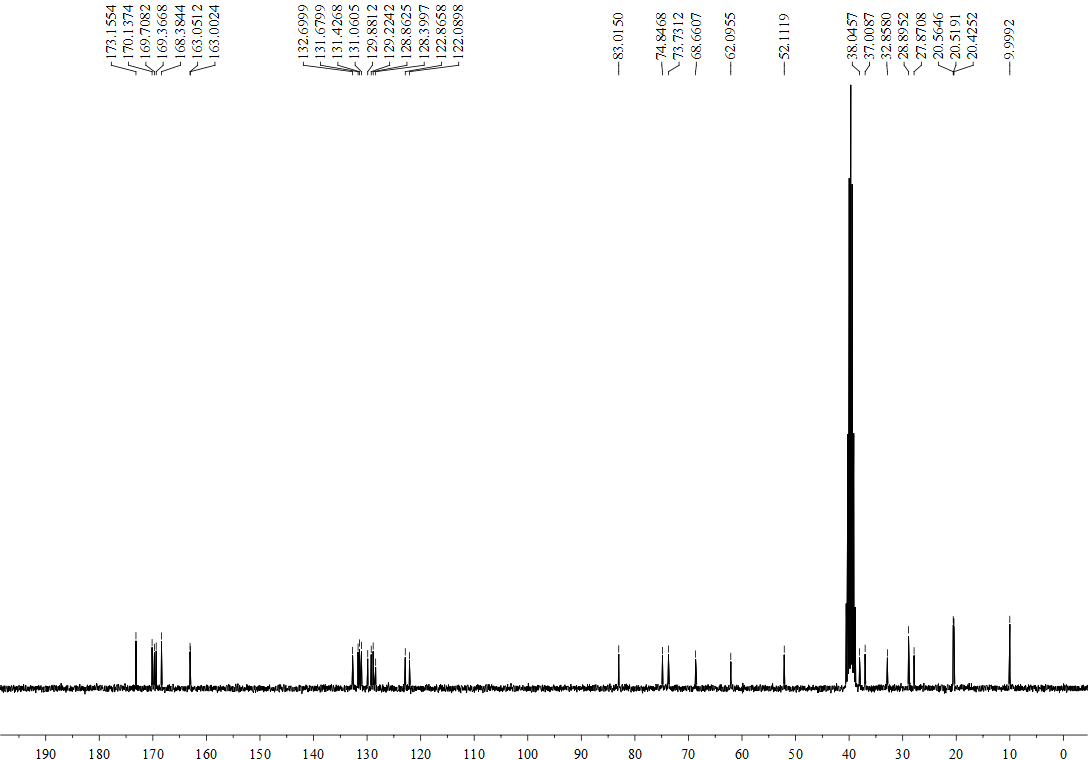


**1H NMR spectrum of 15m (300 MHz, DMSO-*d6*)**


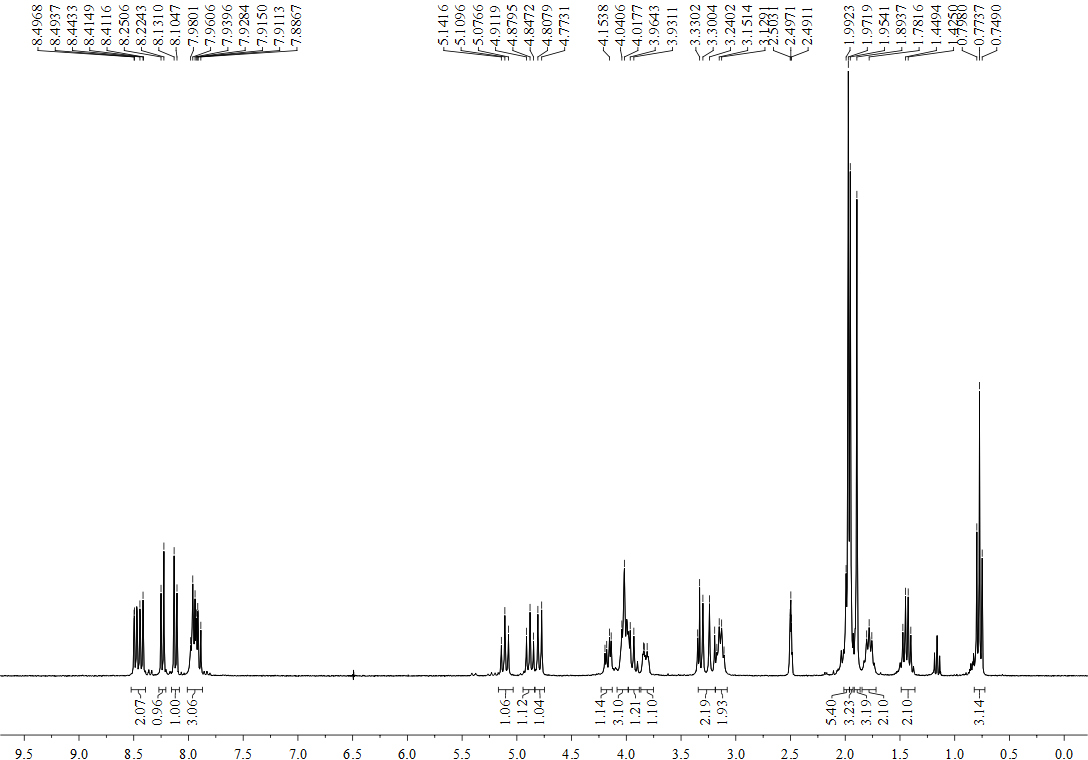


**13C NMR spectrum of 15m (300 MHz, DMSO-*d6*)**


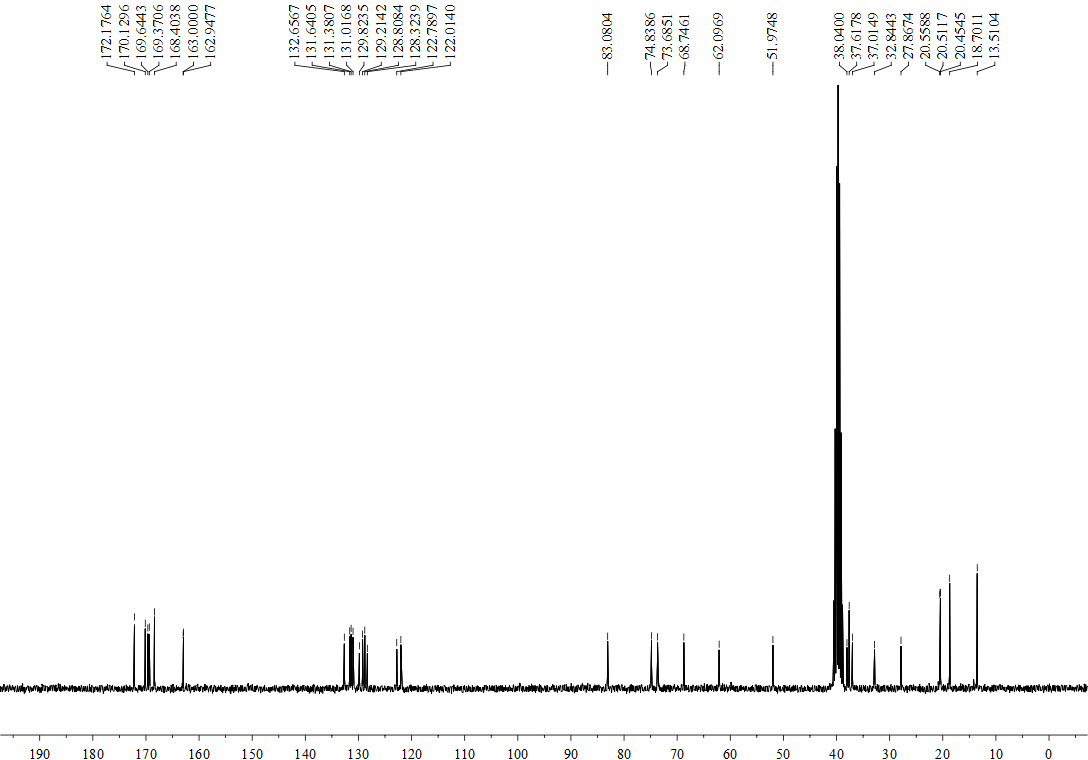


**1H NMR spectrum of 15n (300 MHz, DMSO-*d6*)**


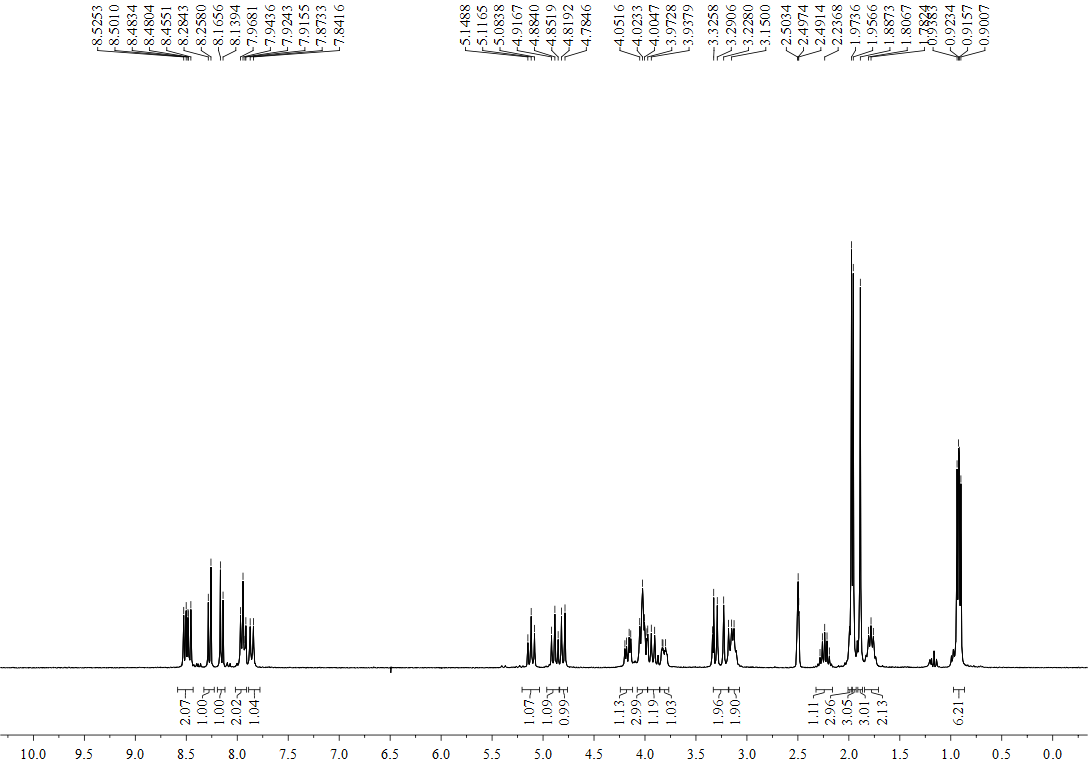


**13C NMR spectrum of 15n (300 MHz, DMSO-*d6*)**


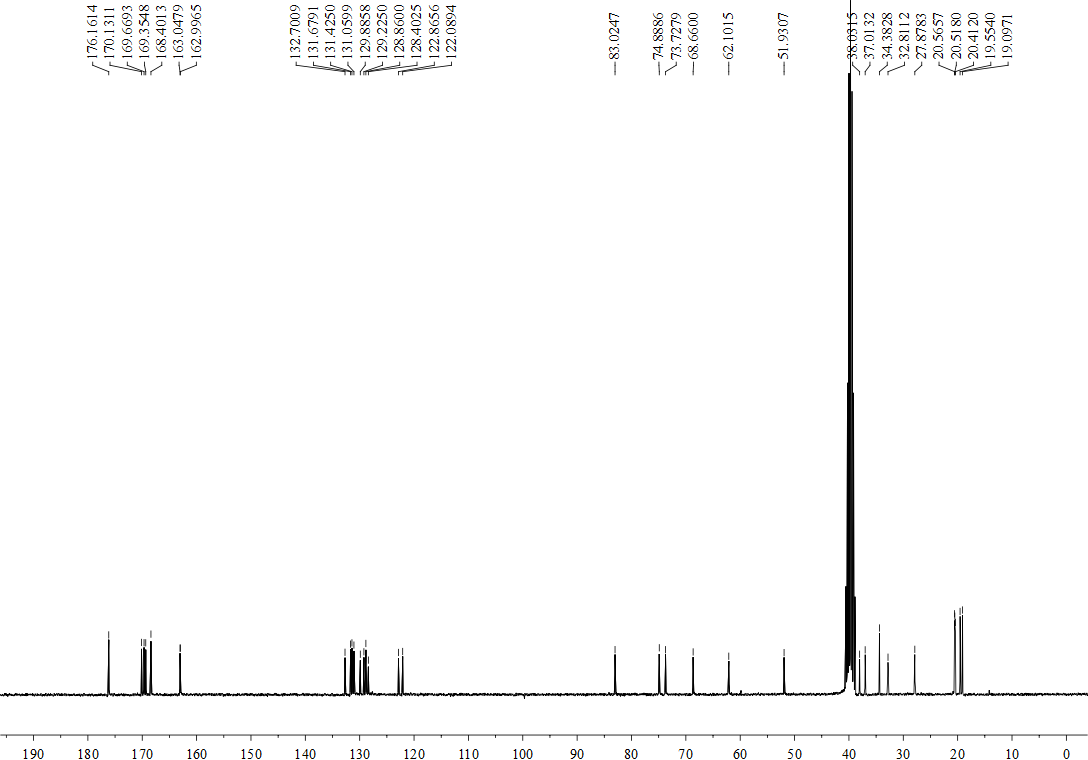


**1H NMR spectrum of 15o (300 MHz, DMSO-*d6*)**


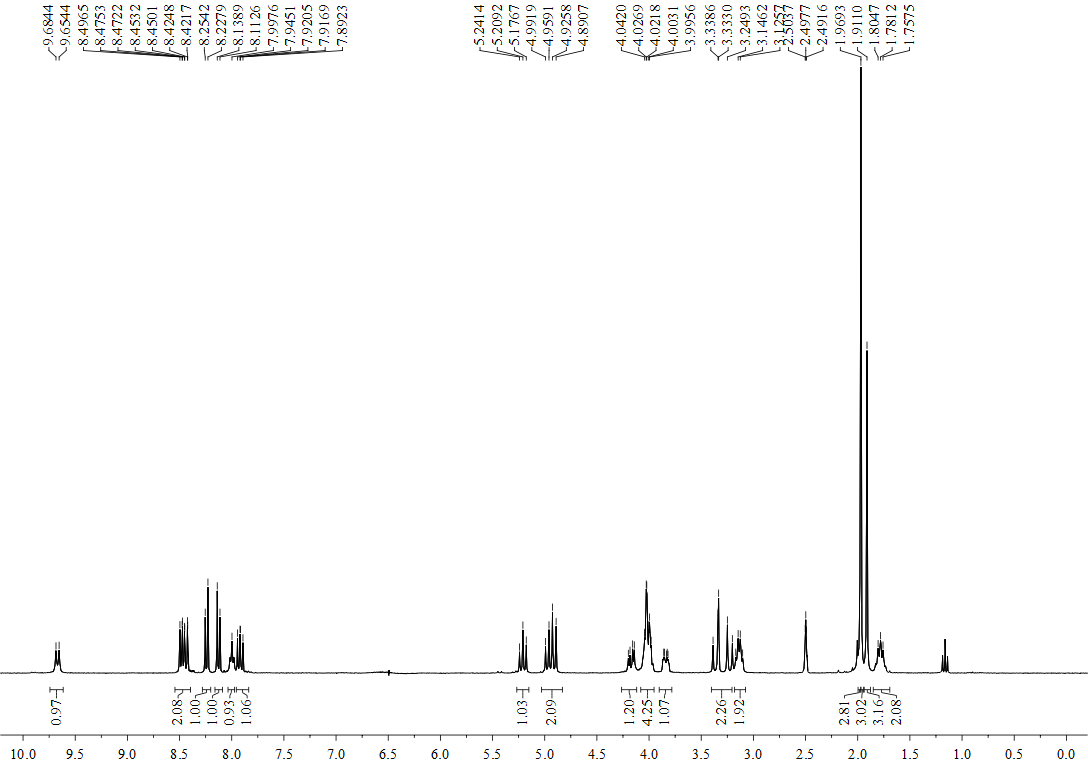


**13C NMR spectrum of 15o (300 MHz, DMSO-*d6*)**


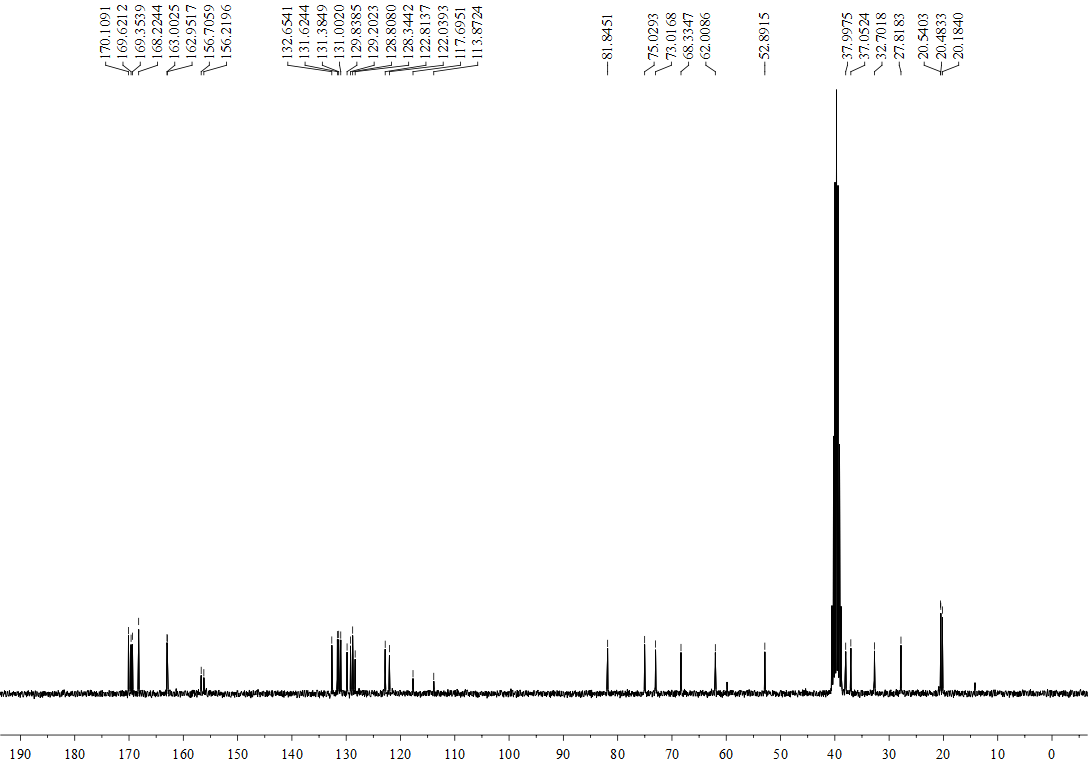


**1H NMR spectrum of 15p (300 MHz, DMSO-*d6*)**


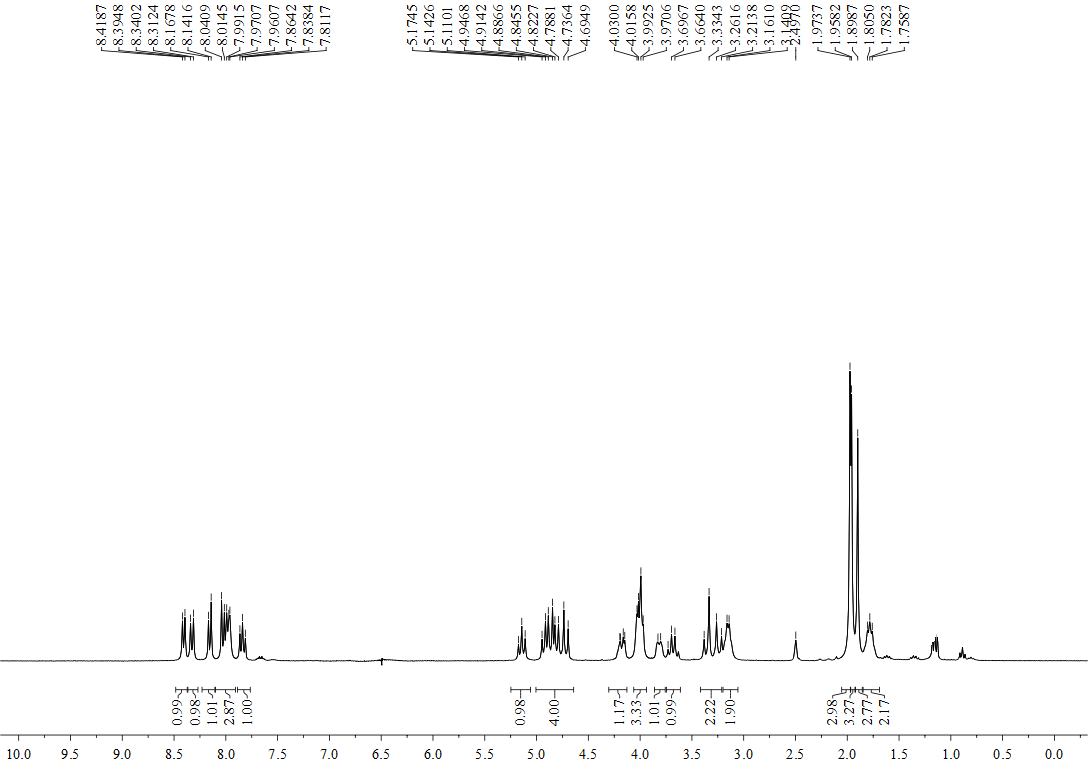


**13C NMR spectrum of 15p (300 MHz, DMSO-*d6*)**


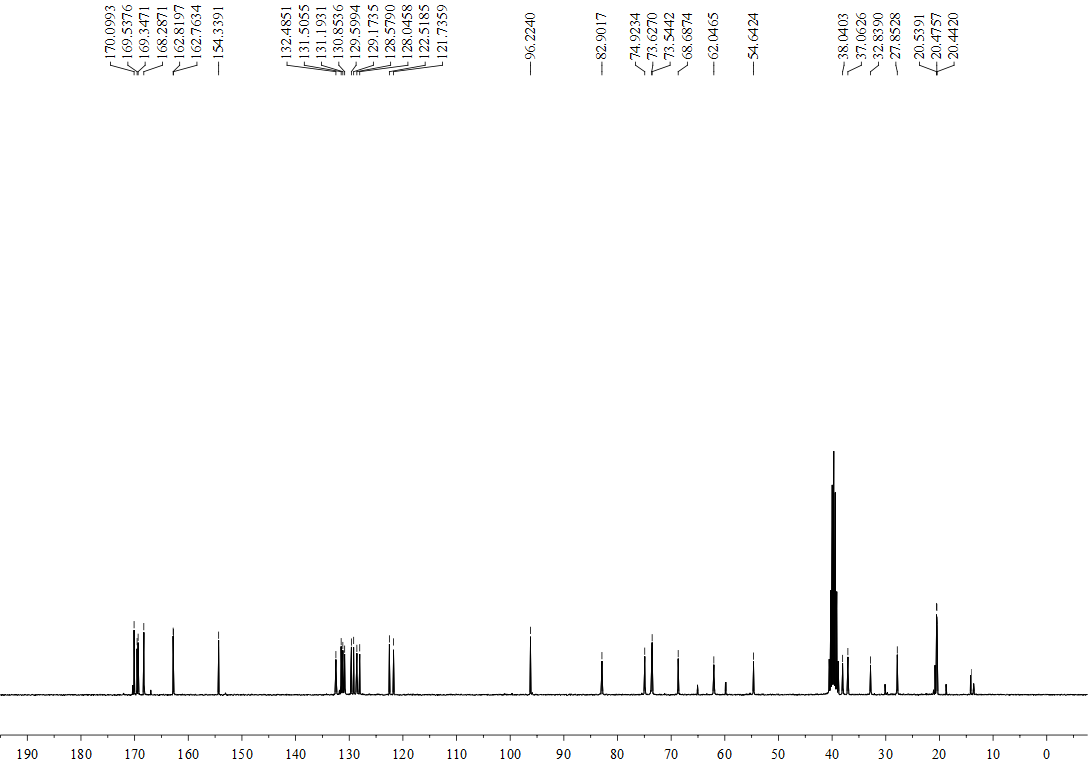


**1H NMR spectrum of 16a (300 MHz, DMSO-*d6*)**


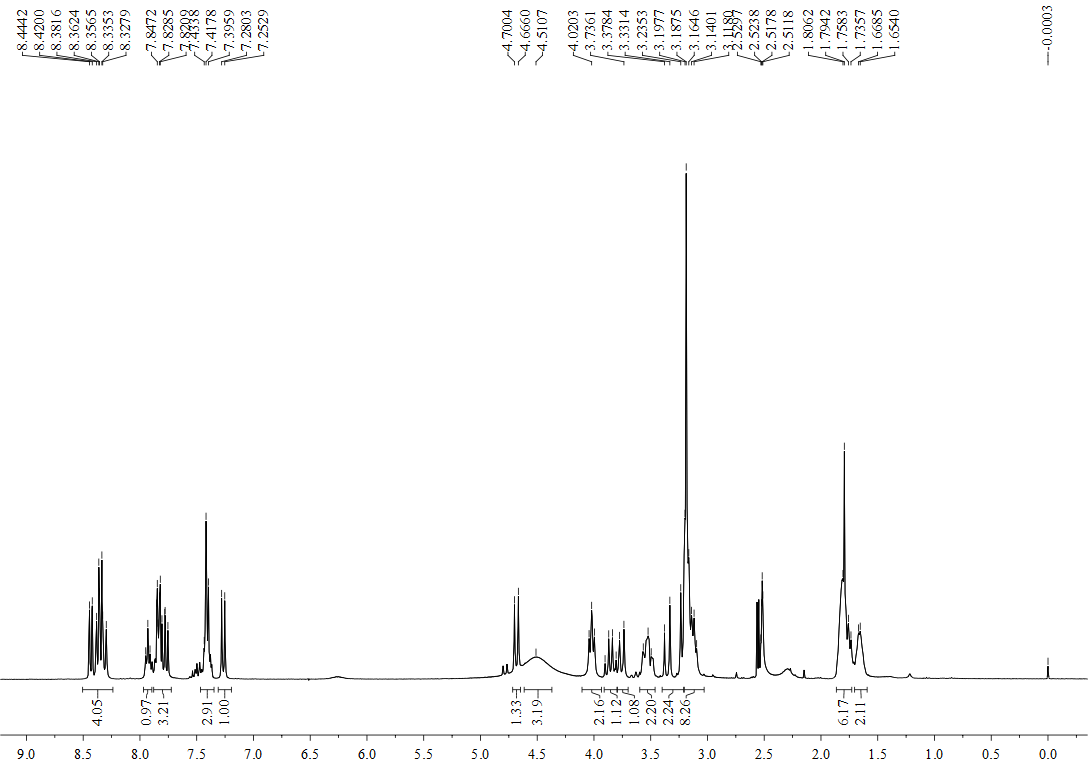


**13C NMR spectrum of 16a (300 MHz, DMSO-*d6*)**


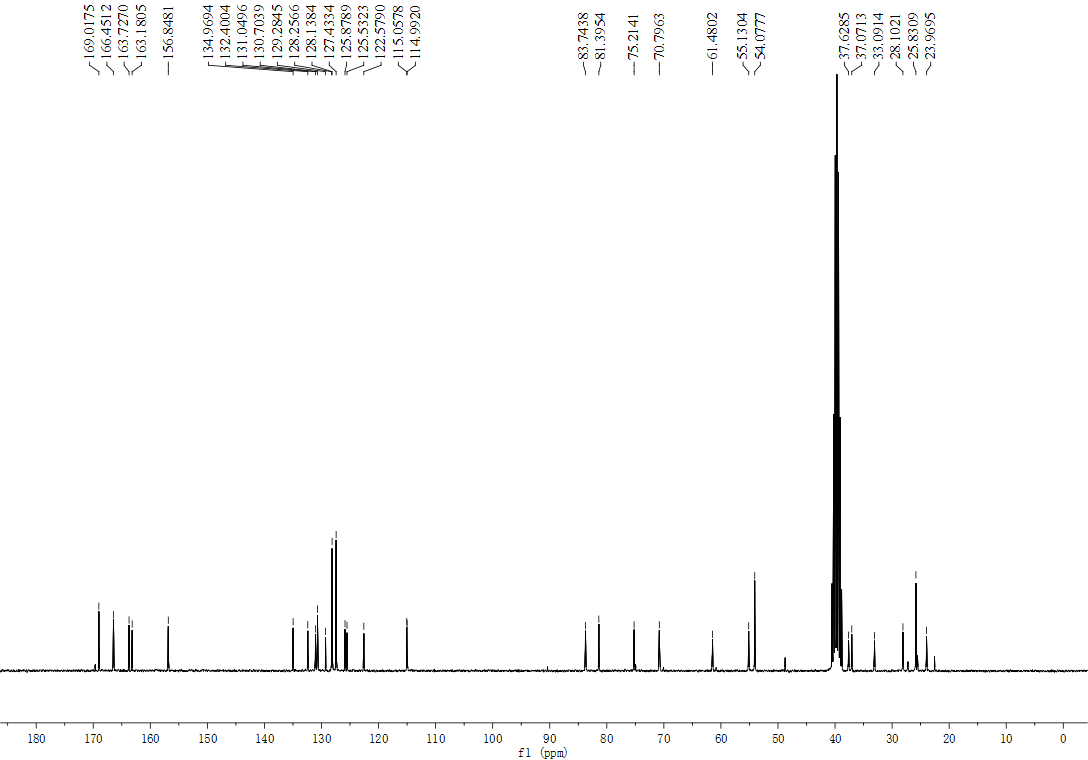


**1H NMR spectrum of 16b (300 MHz, DMSO-*d6*)**


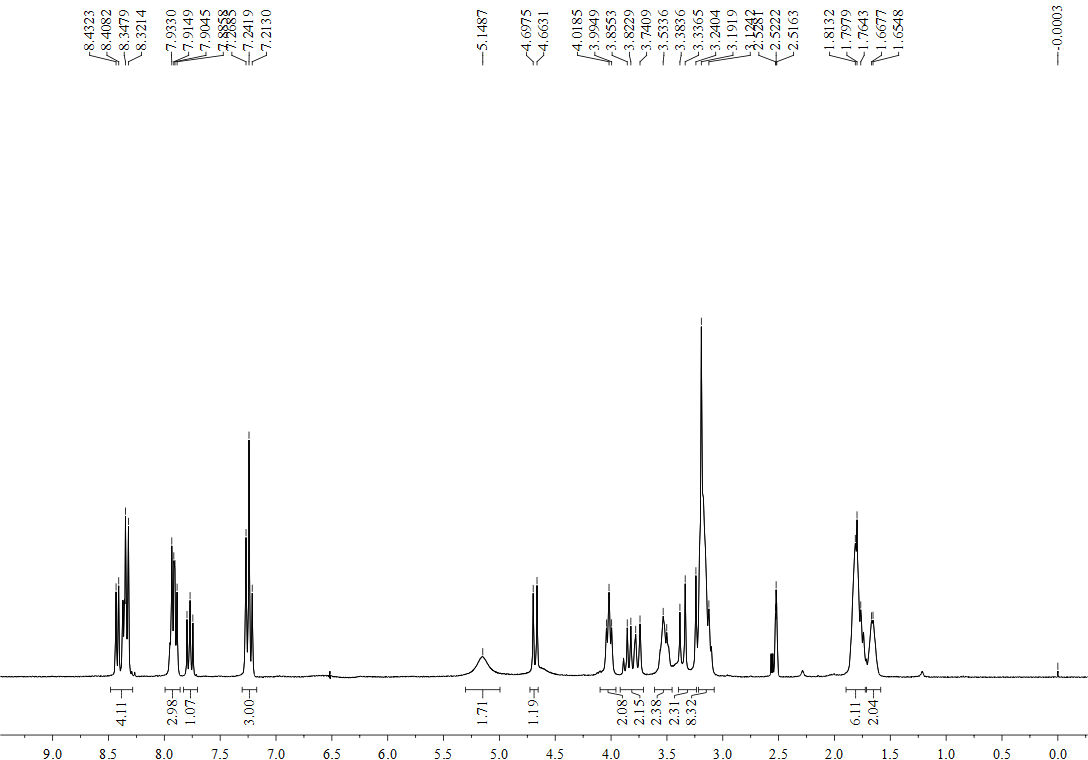


**13C NMR spectrum of 16b (300 MHz, DMSO-*d6*)**


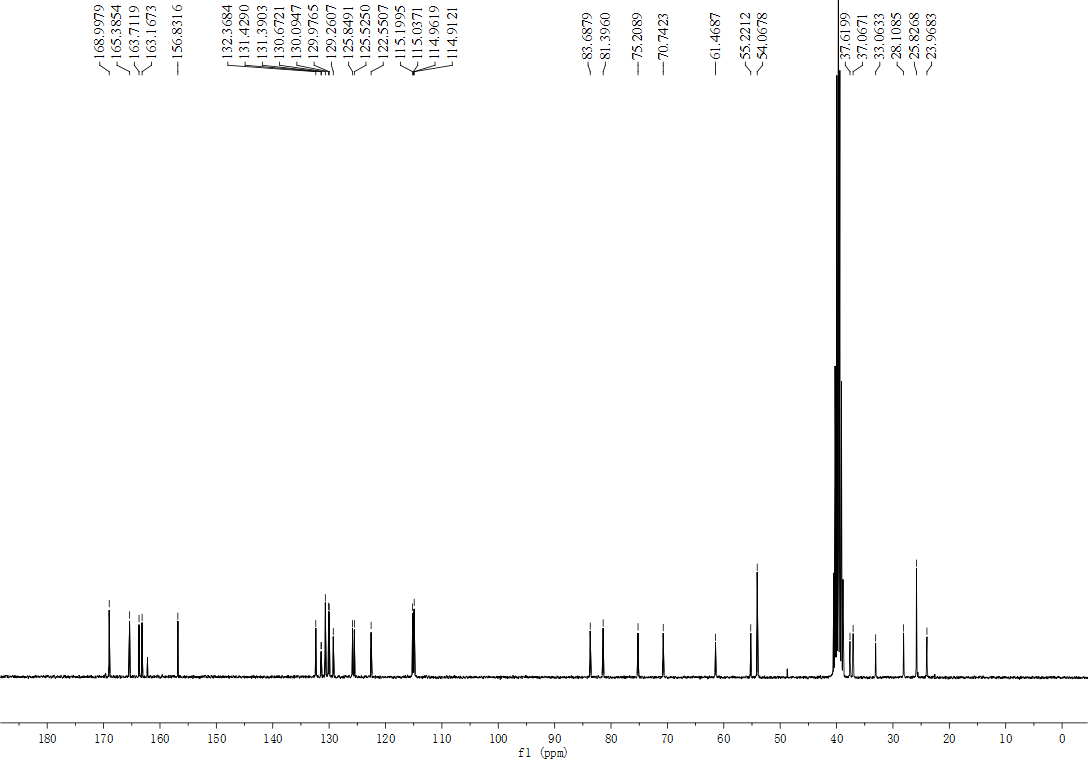


**1H NMR spectrum of 16c (300 MHz, DMSO-*d6*)**


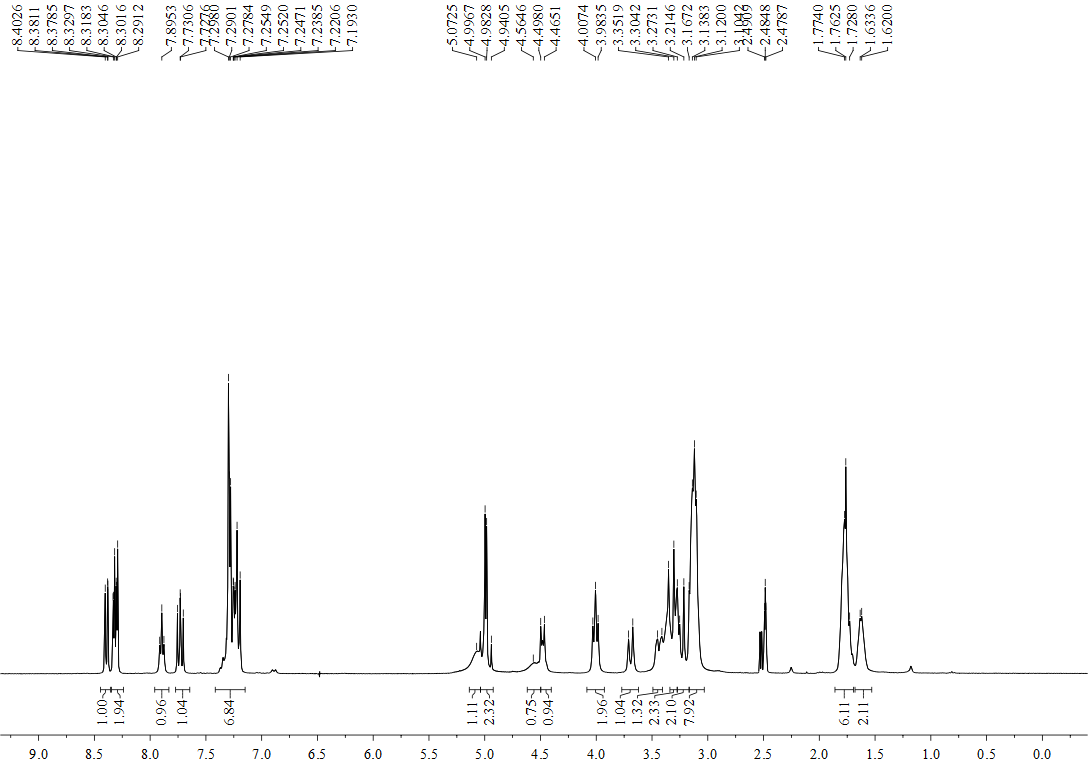


**13C NMR spectrum of 16c (300 MHz, DMSO-*d6*)**


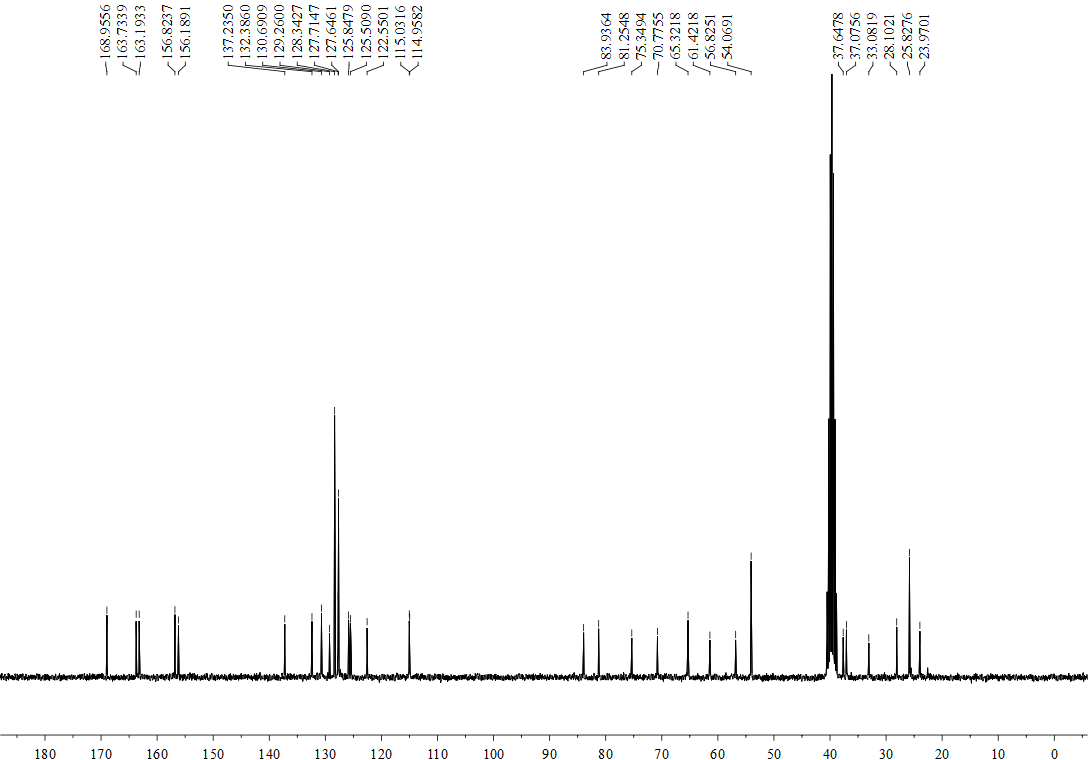


**1H NMR spectrum of 16d (300 MHz, DMSO-*d6*)**


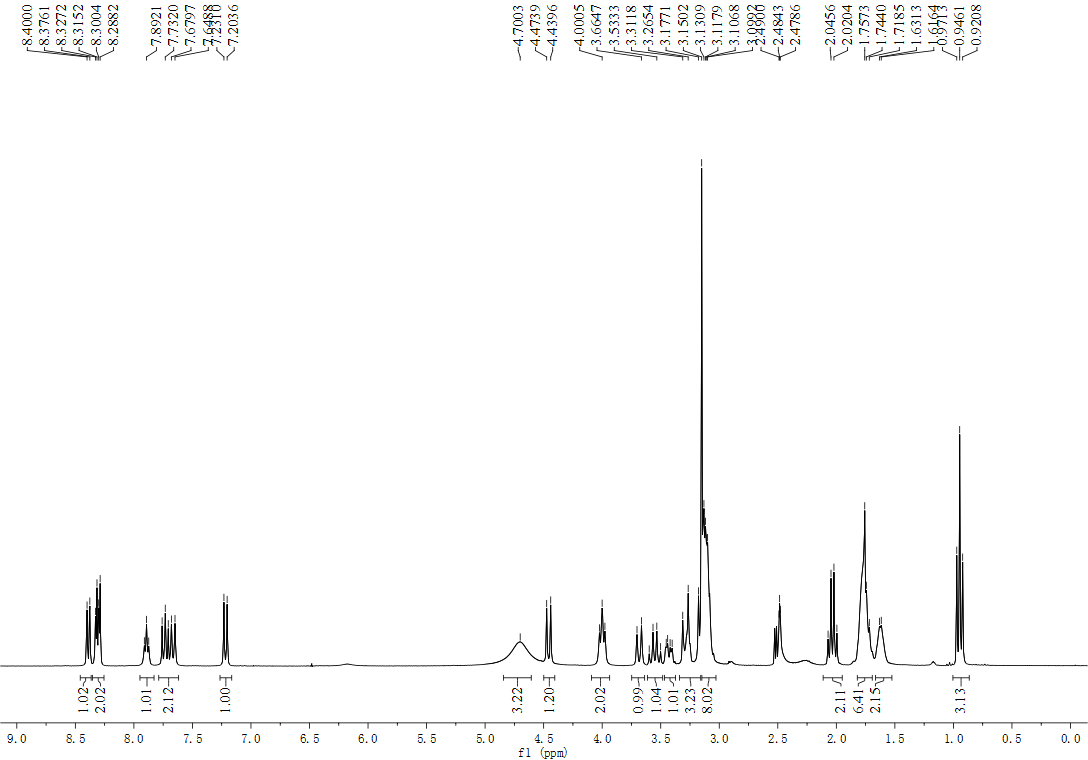


**13C NMR spectrum of 16d (300 MHz, DMSO-*d6*)**


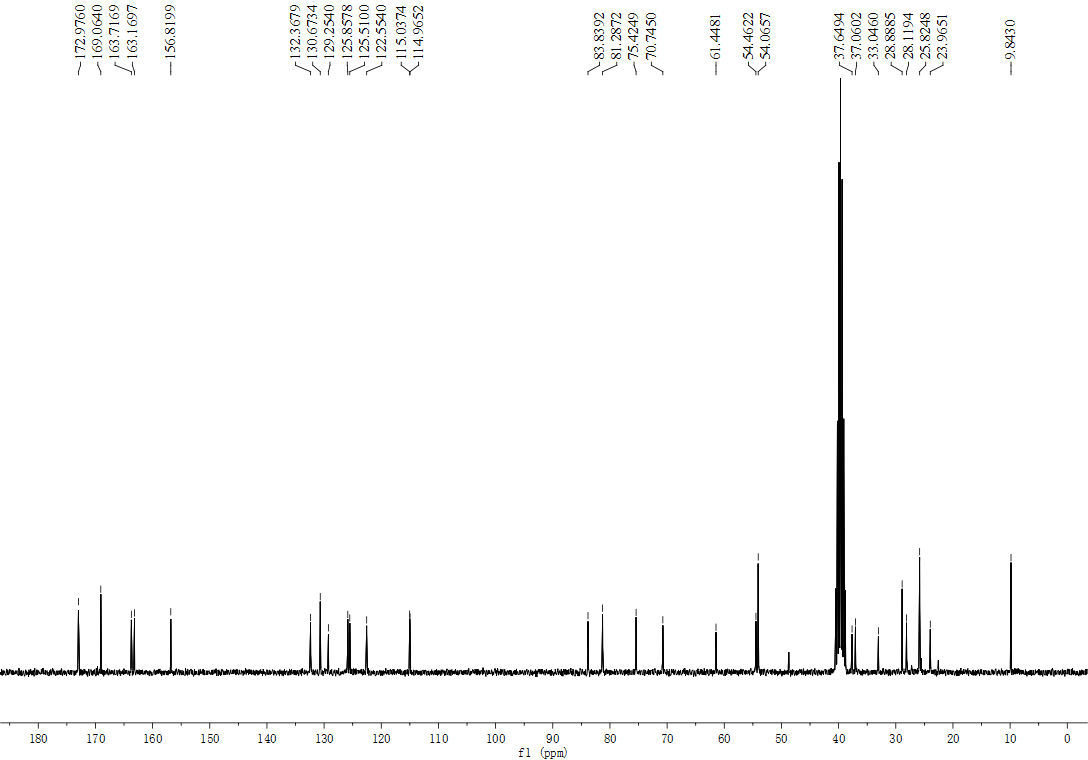


**1H NMR spectrum of 16e (300 MHz, DMSO-*d6*)**


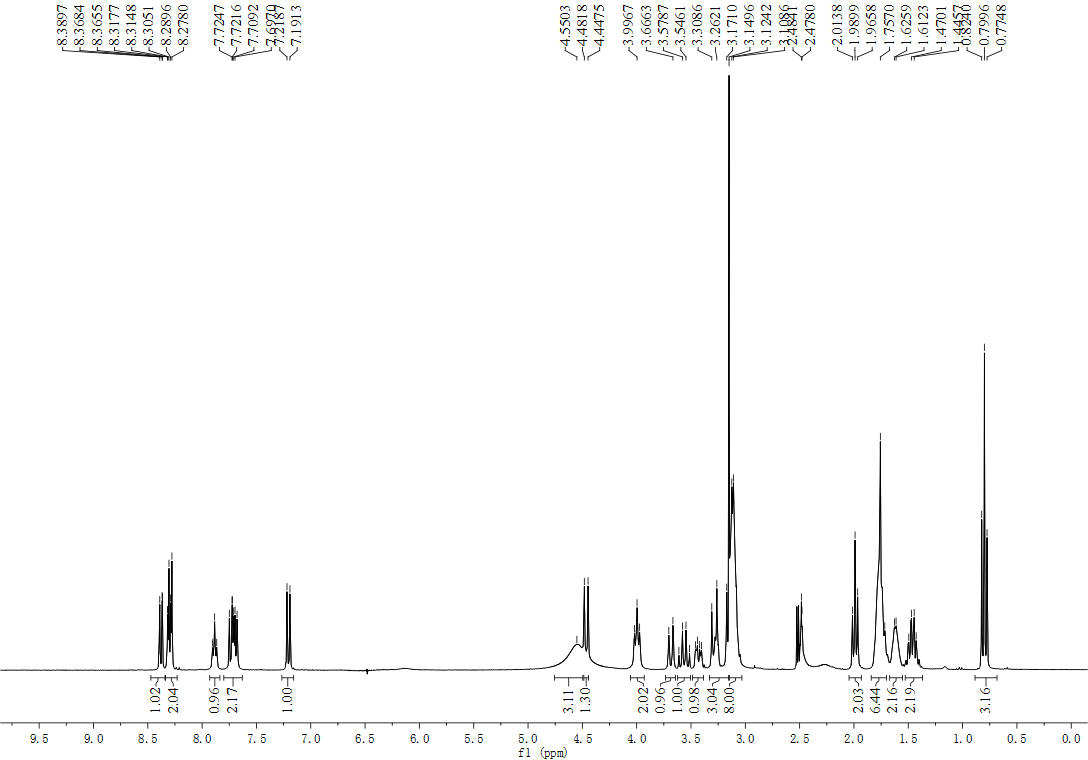


**13C NMR spectrum of 16e (300 MHz, DMSO-*d6*)**


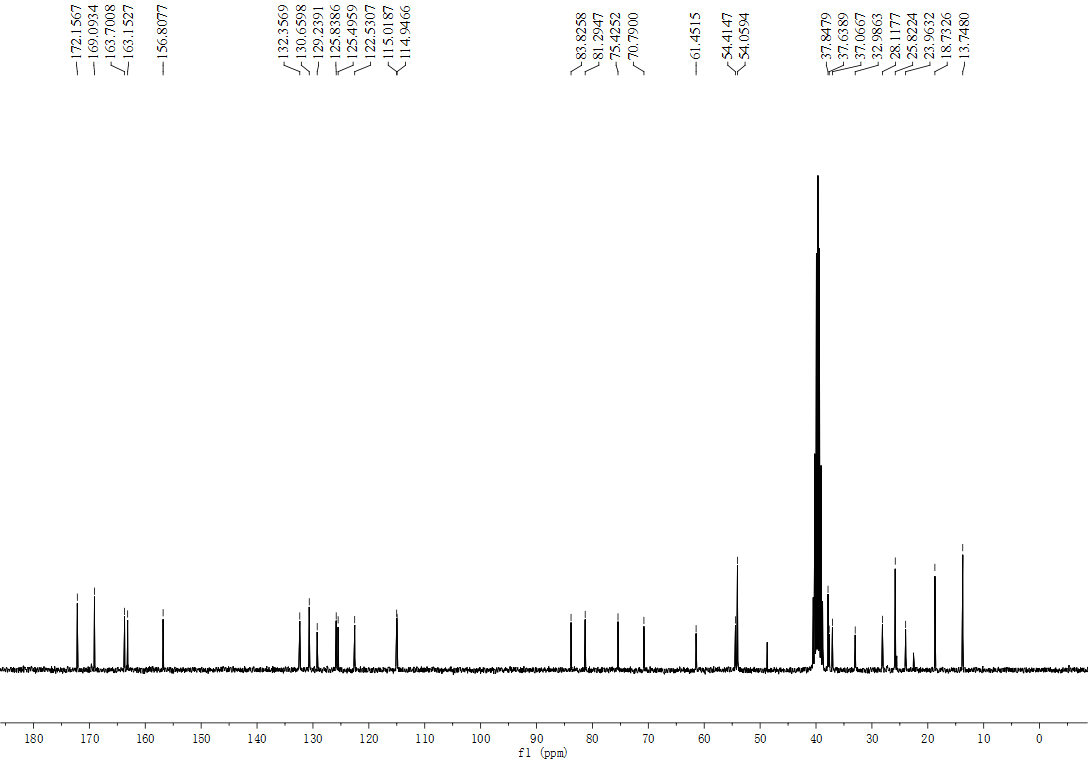


**1H NMR spectrum of 16f (300 MHz, DMSO-*d6*)**


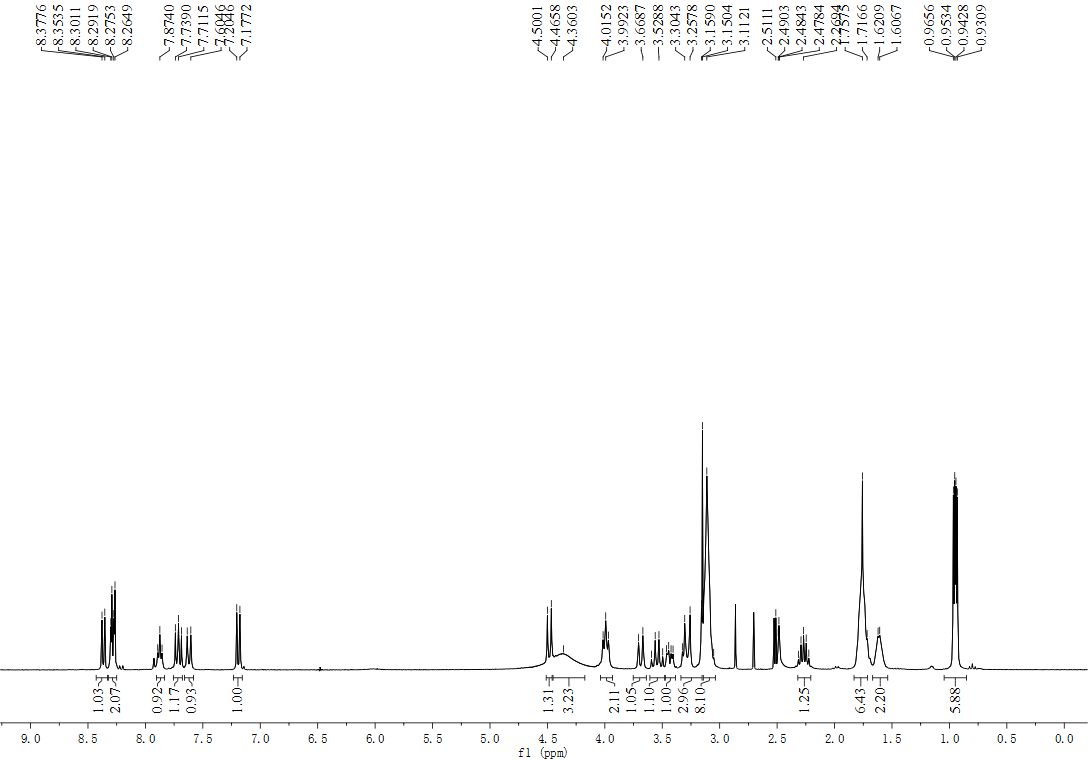


**13C NMR spectrum of 16f (300 MHz, DMSO-*d6*)**


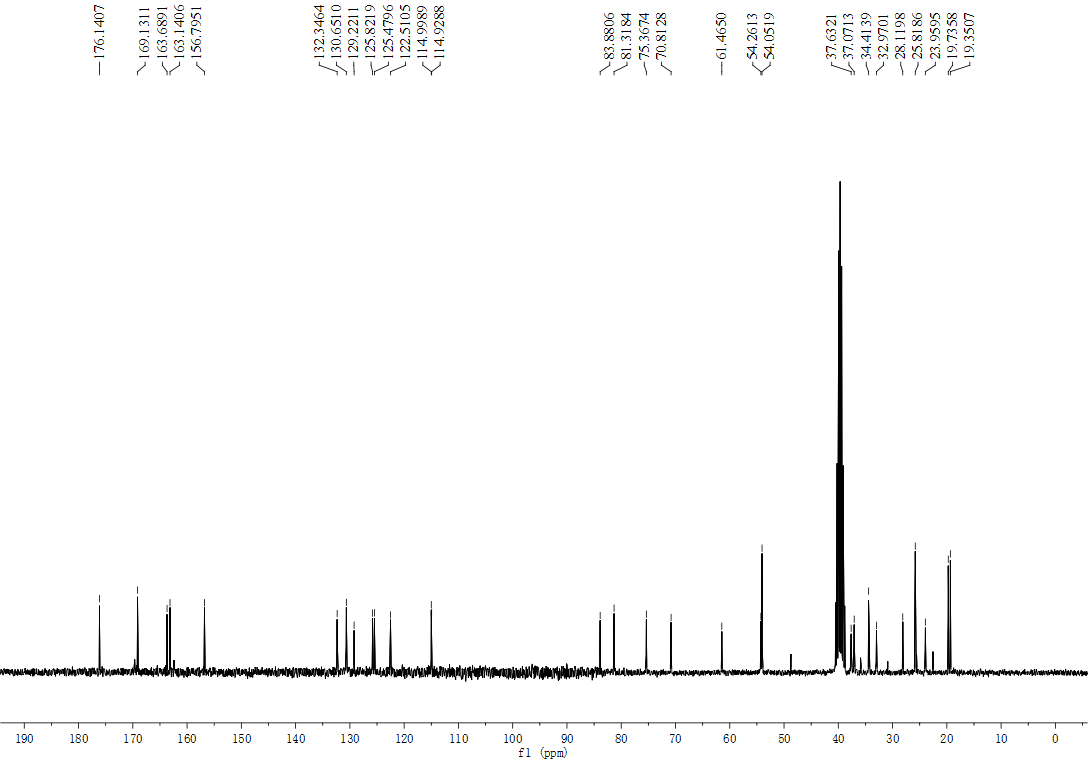


**1H NMR spectrum of 16g (300 MHz, DMSO-*d6*)**


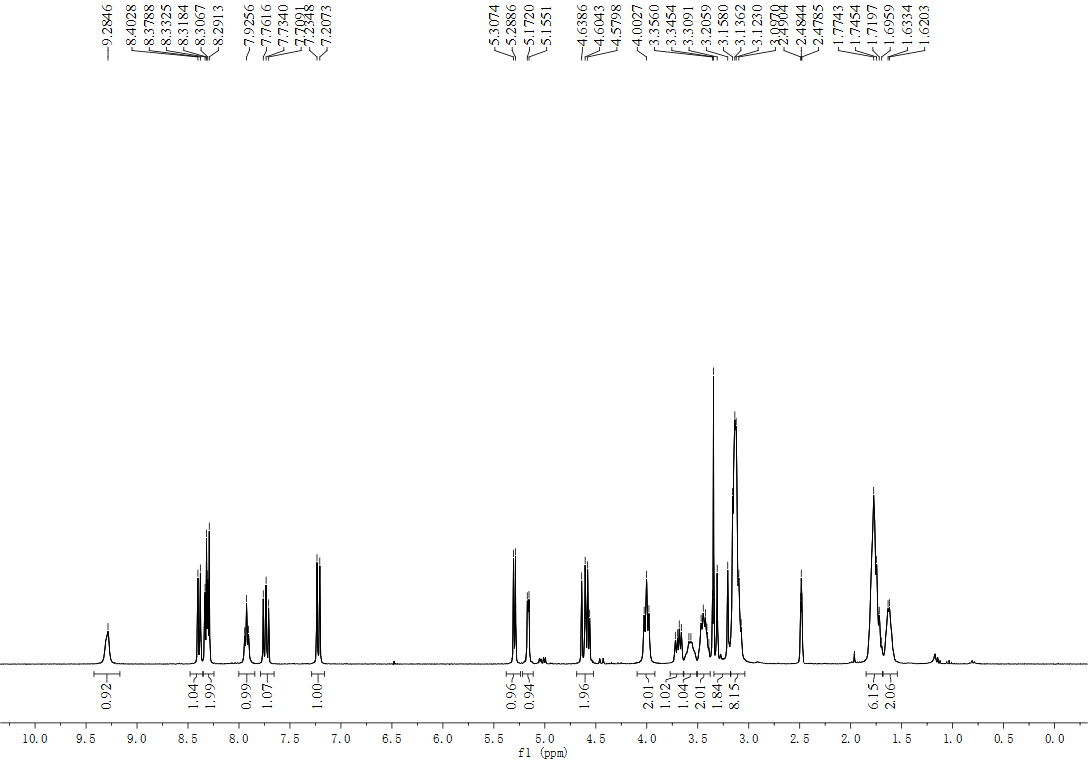


**13C NMR spectrum of 16g (300 MHz, DMSO-*d6*)**


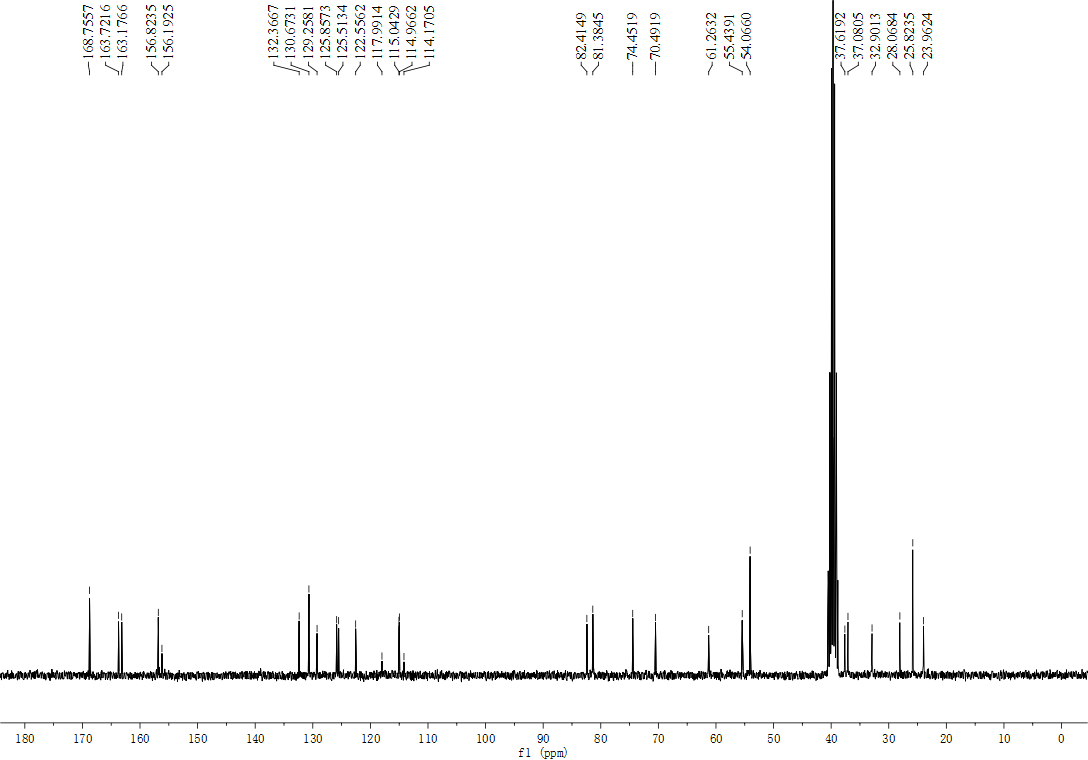


**1H NMR spectrum of 16h (300 MHz, DMSO-*d6*)**


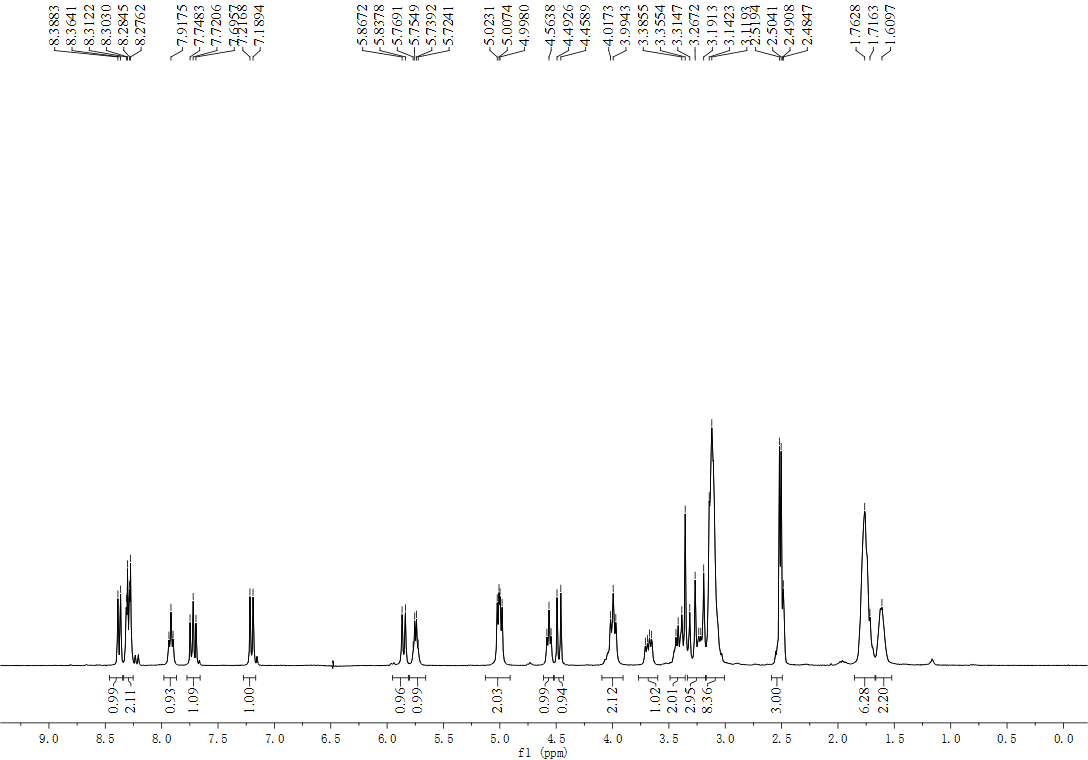


**13C NMR spectrum of 16h (300 MHz, DMSO-*d6*)**


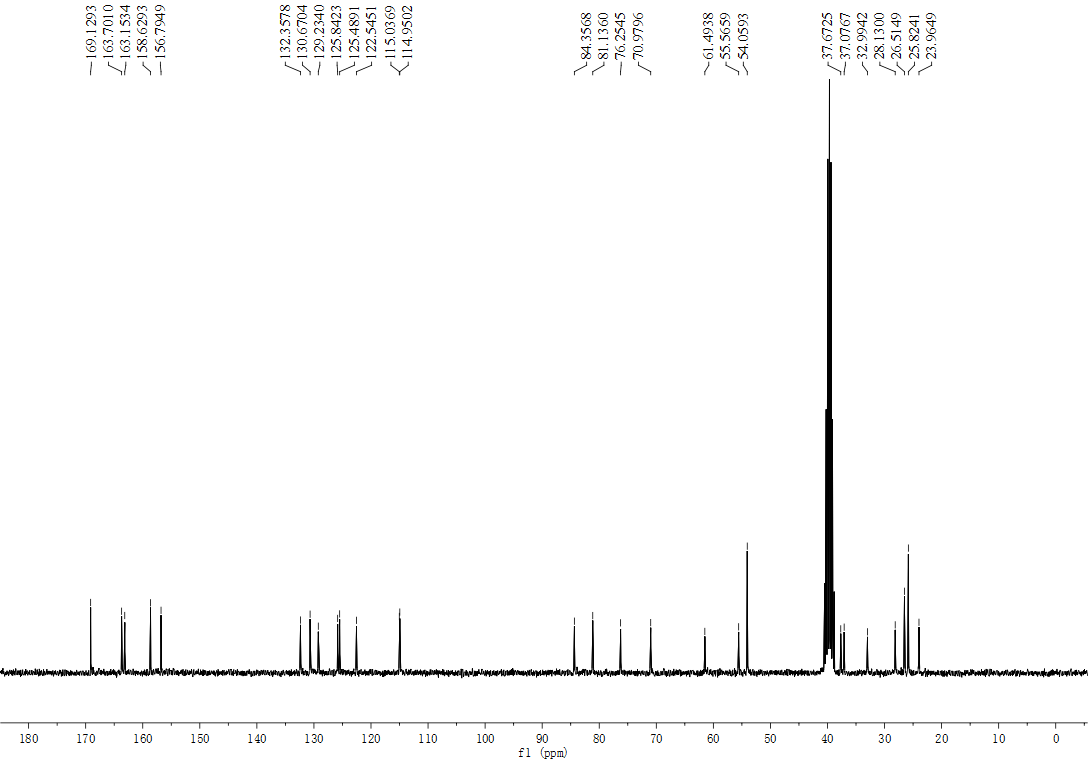


**1H NMR spectrum of 16j (300 MHz, DMSO-*d6*)**


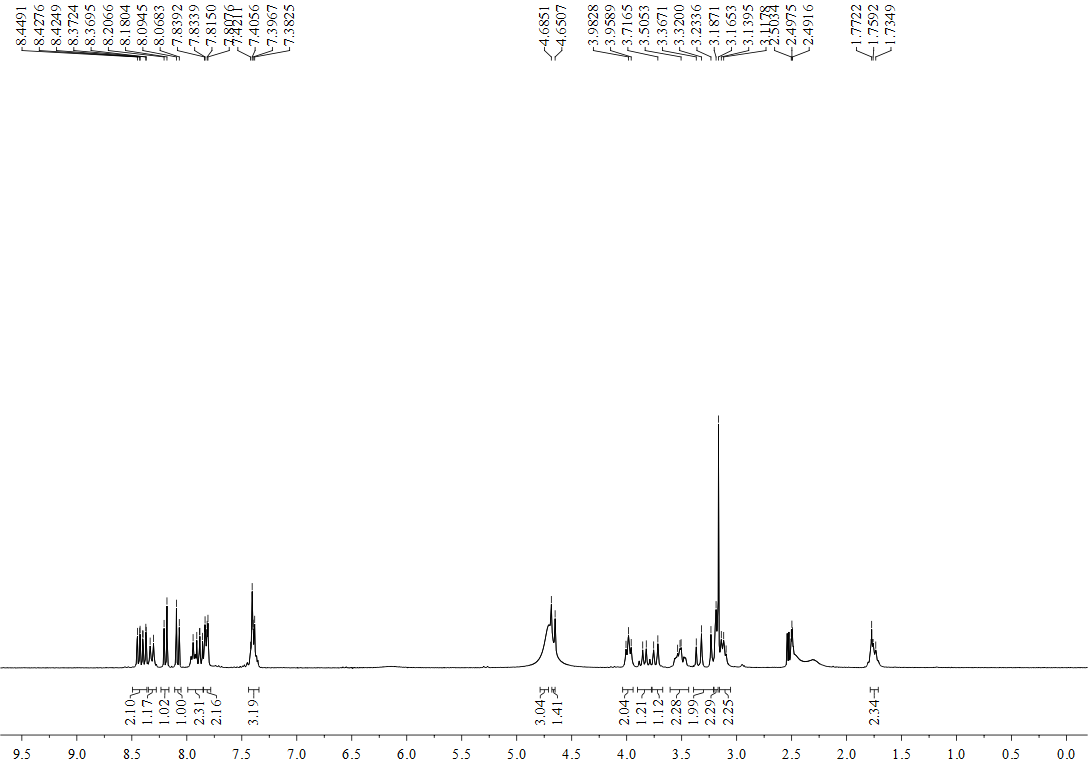


**13C NMR spectrum of 16j (300 MHz, DMSO-*d6*)**


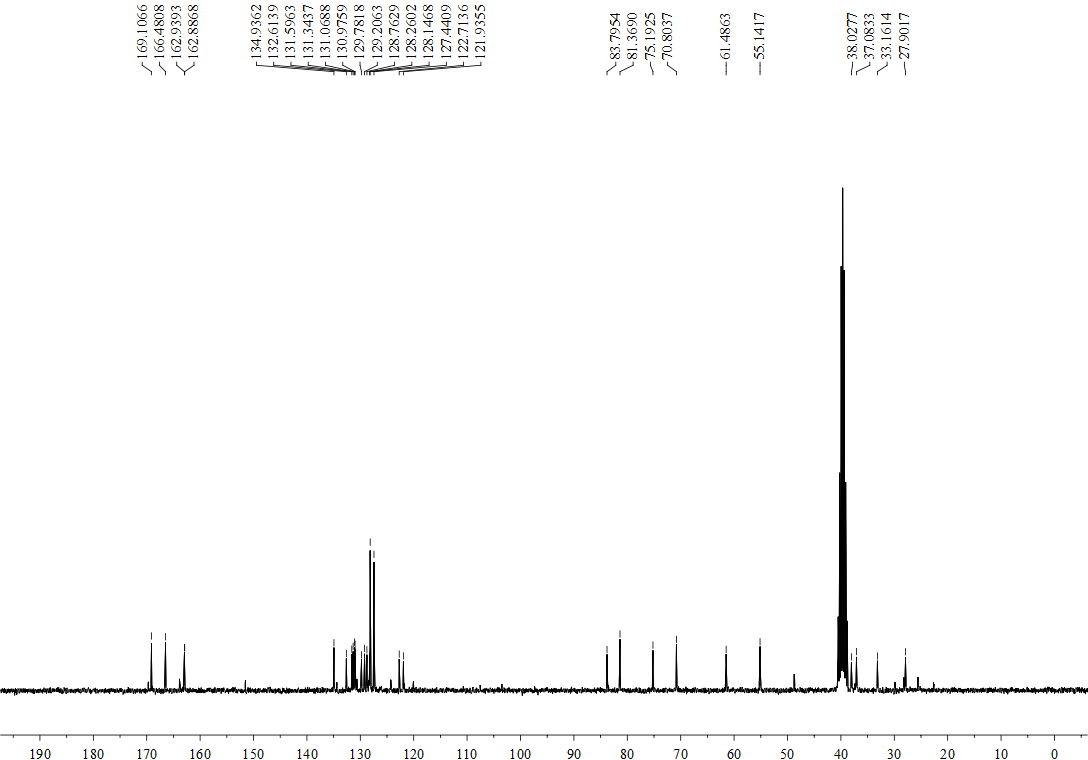


**1H NMR spectrum of 16k (300 MHz, DMSO-*d6*)**


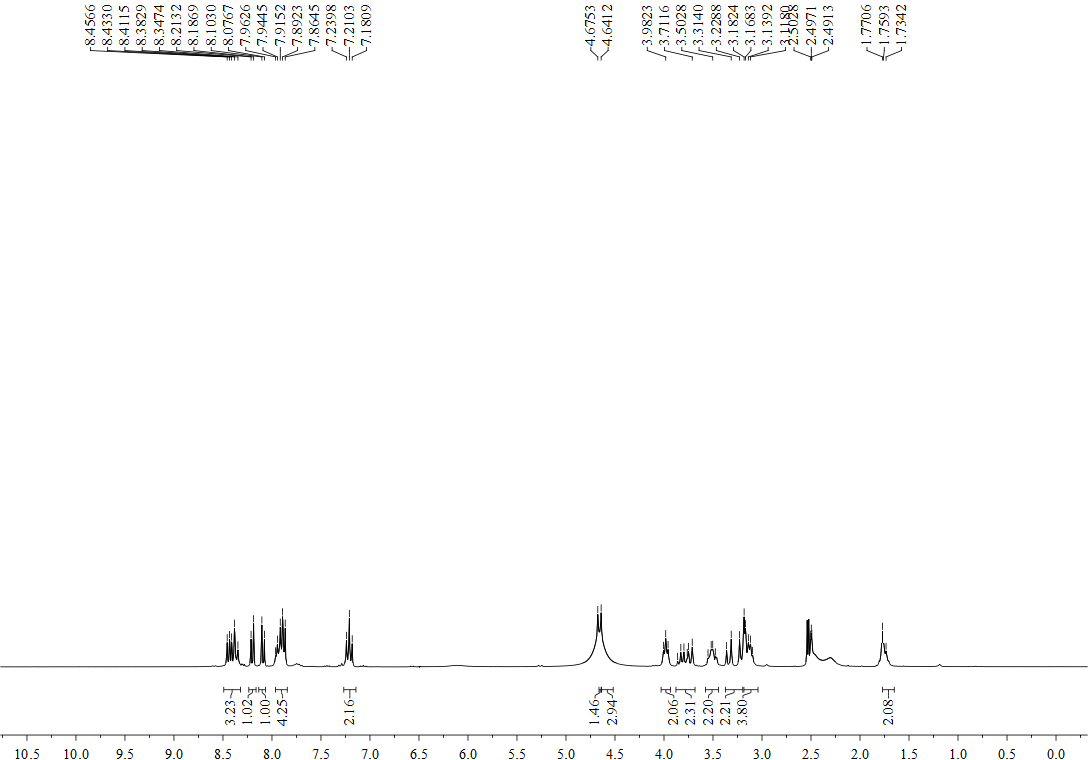


**13C NMR spectrum of 16k (300 MHz, DMSO-*d6*)**


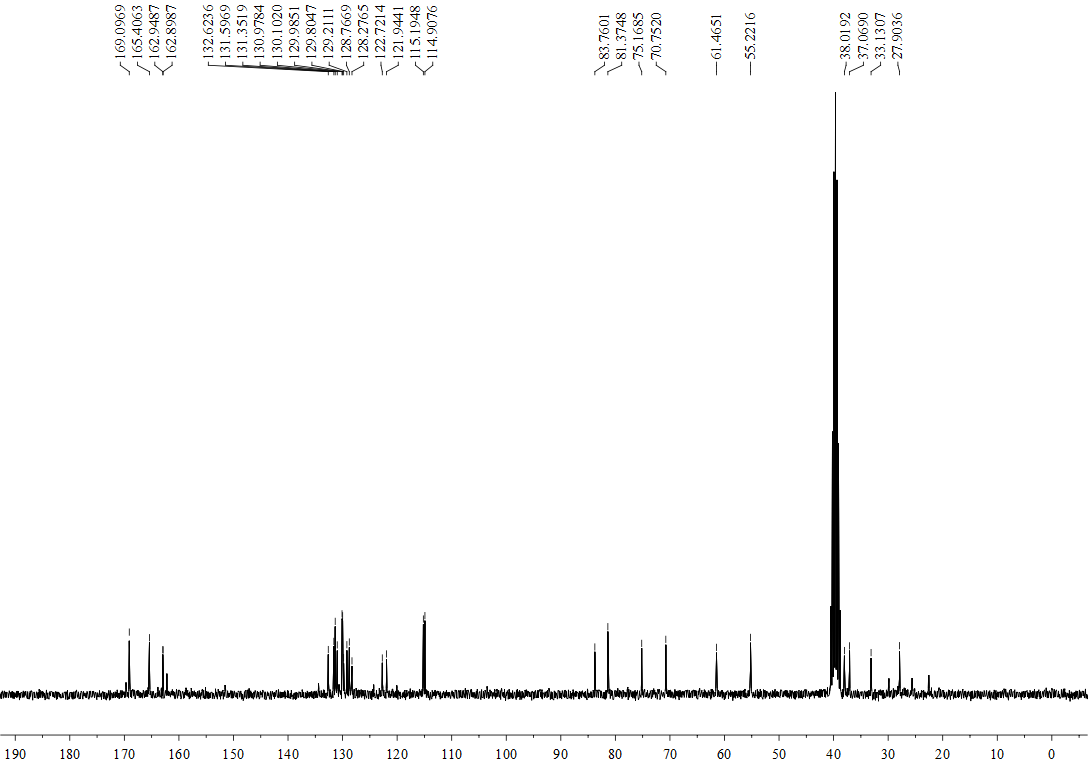


**1H NMR spectrum of 16l (300 MHz, DMSO-*d6*)**


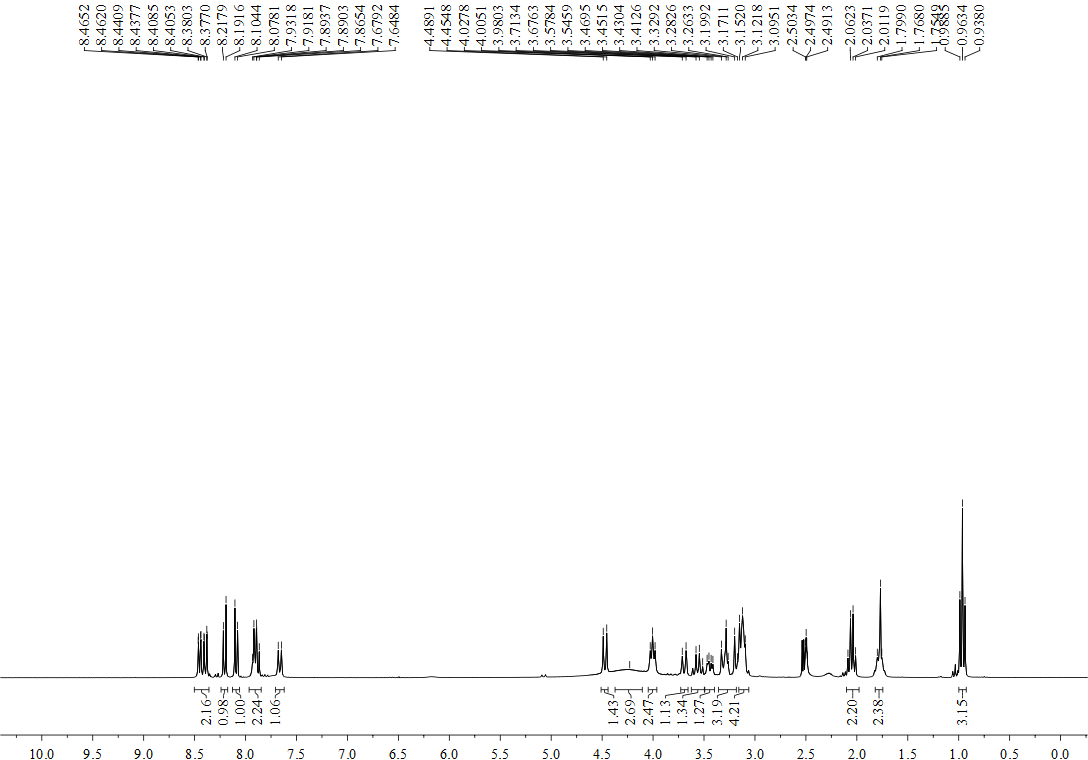


**13C NMR spectrum of 16l (300 MHz, DMSO-*d6*)**


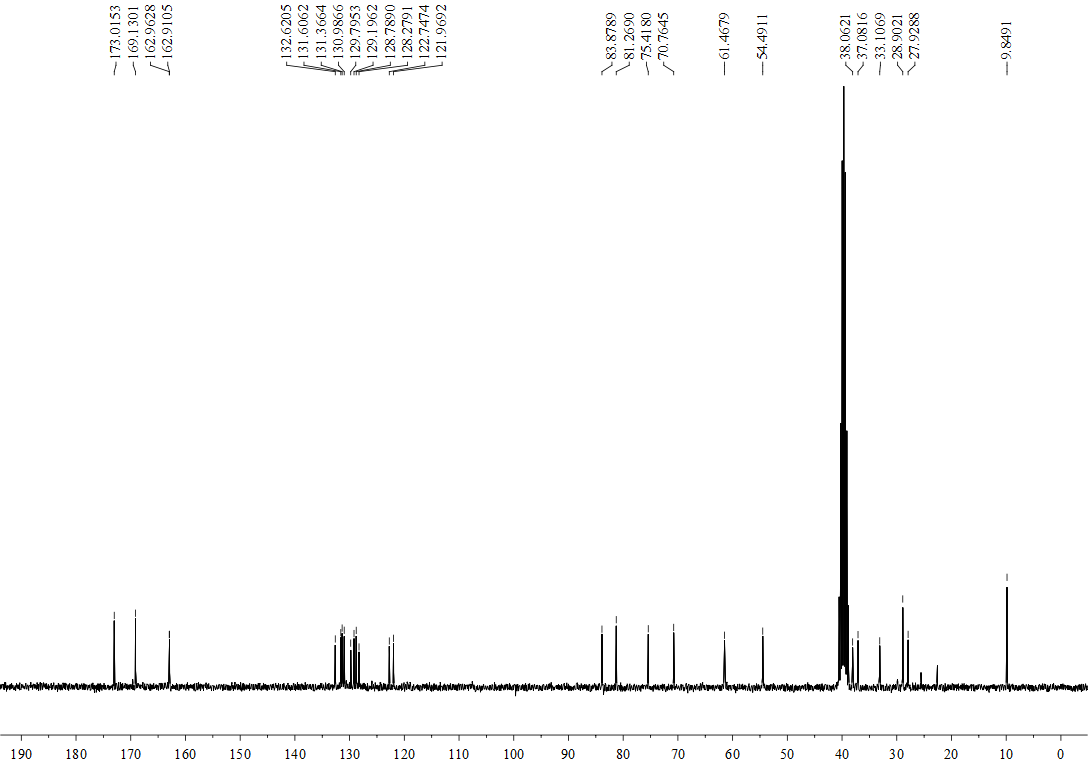


**1H NMR spectrum of 16m (300 MHz, DMSO-*d6*)**


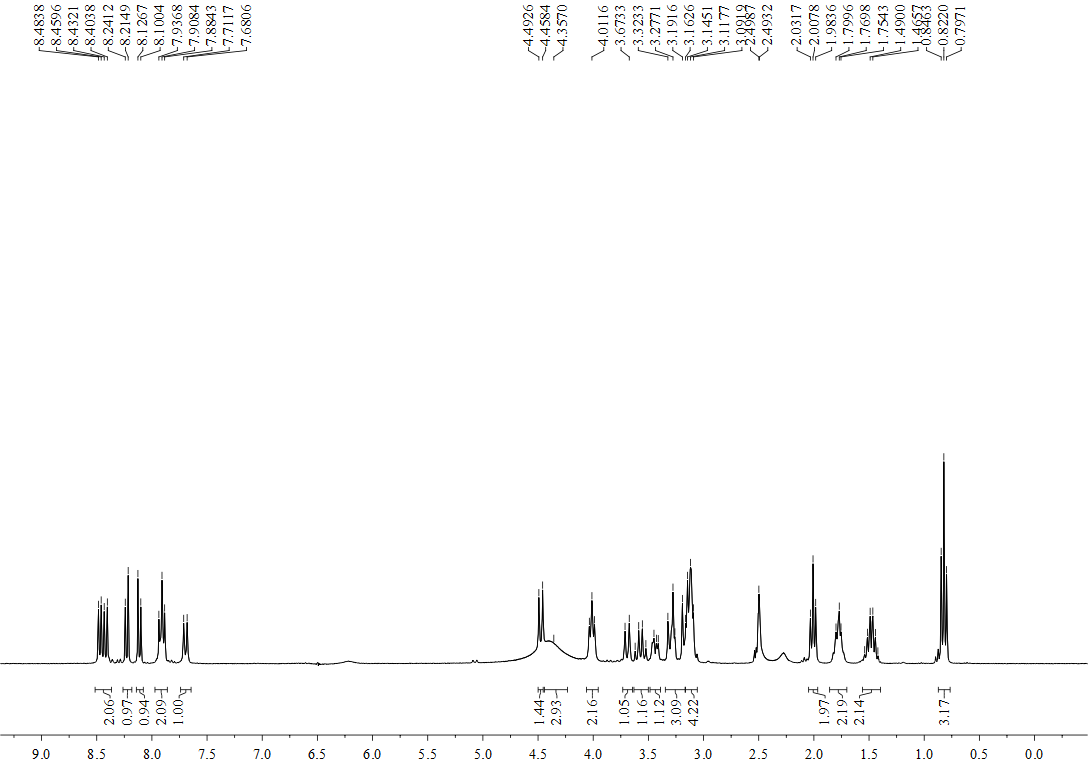


**13C NMR spectrum of 16m (300 MHz, DMSO-*d6*)**


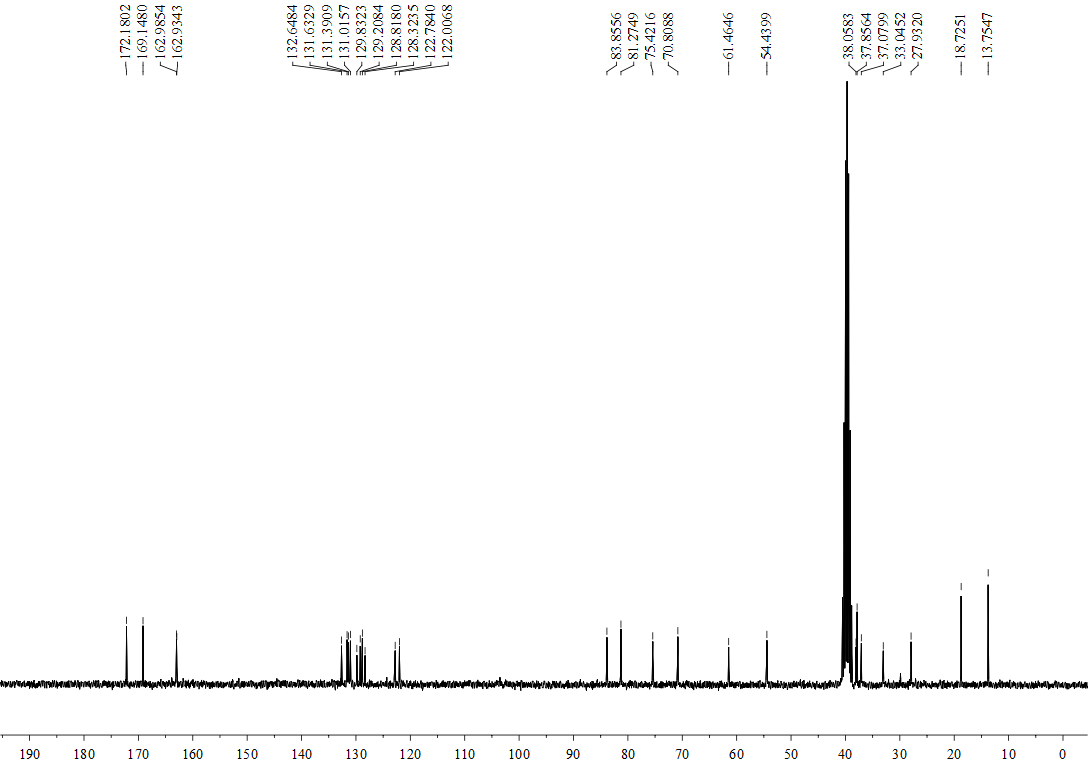


**1H NMR spectrum of 16n (300 MHz, DMSO-*d6*)**


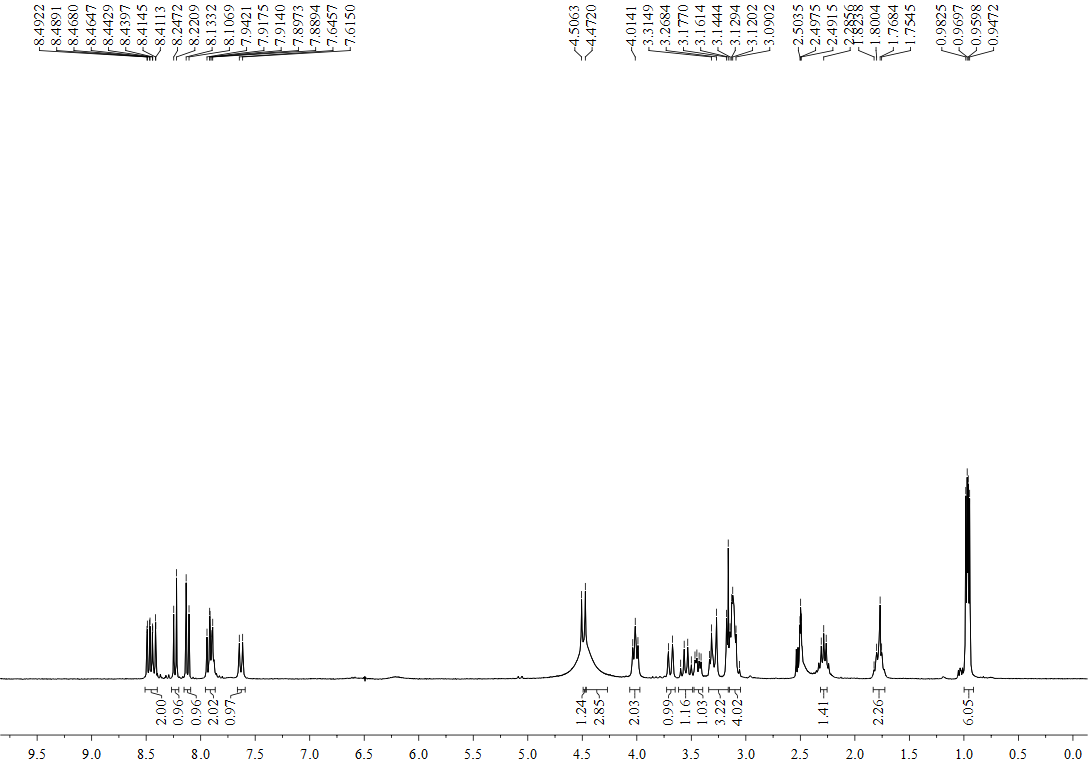


**13C NMR spectrum of 16n (300 MHz, DMSO-*d6*)**


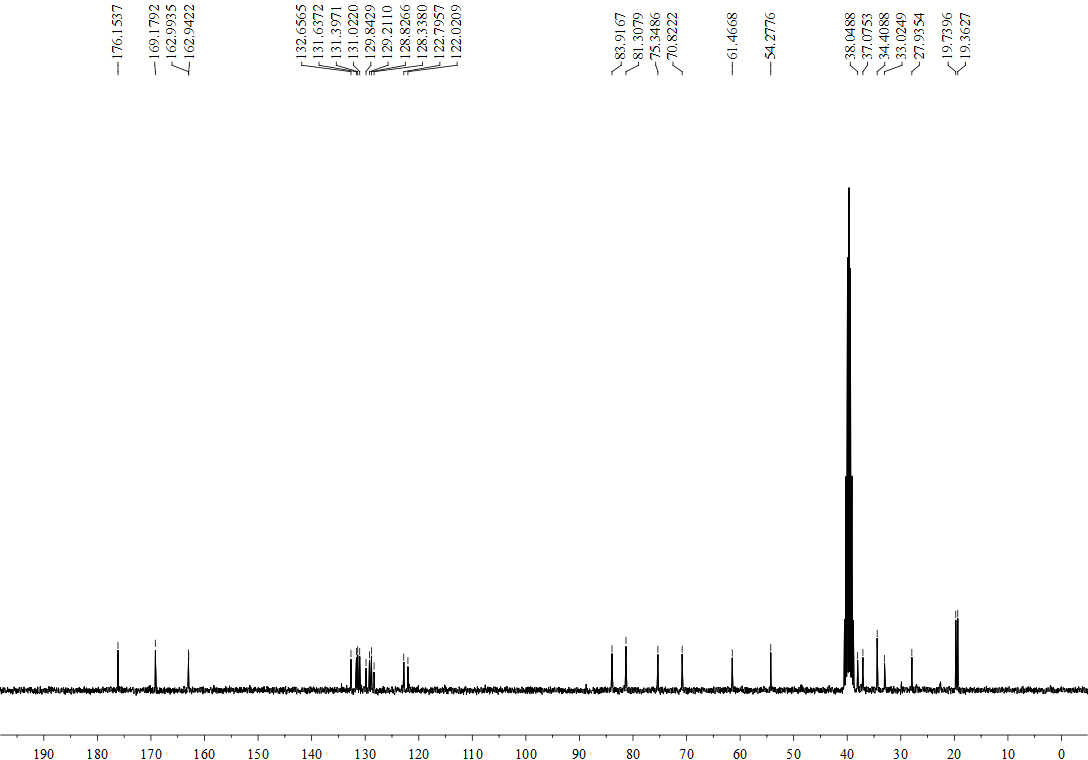


**1H NMR spectrum of 16o (300 MHz, DMSO-*d6*)**


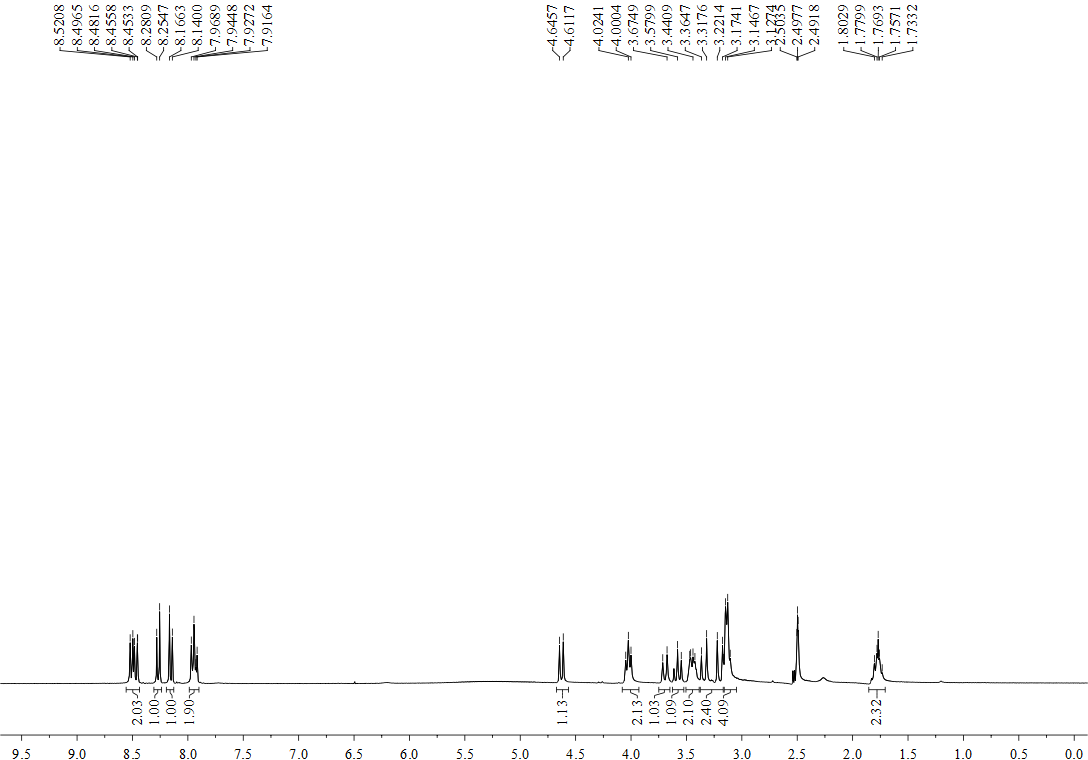


**13C NMR spectrum of 16o (300 MHz, DMSO-*d6*)**


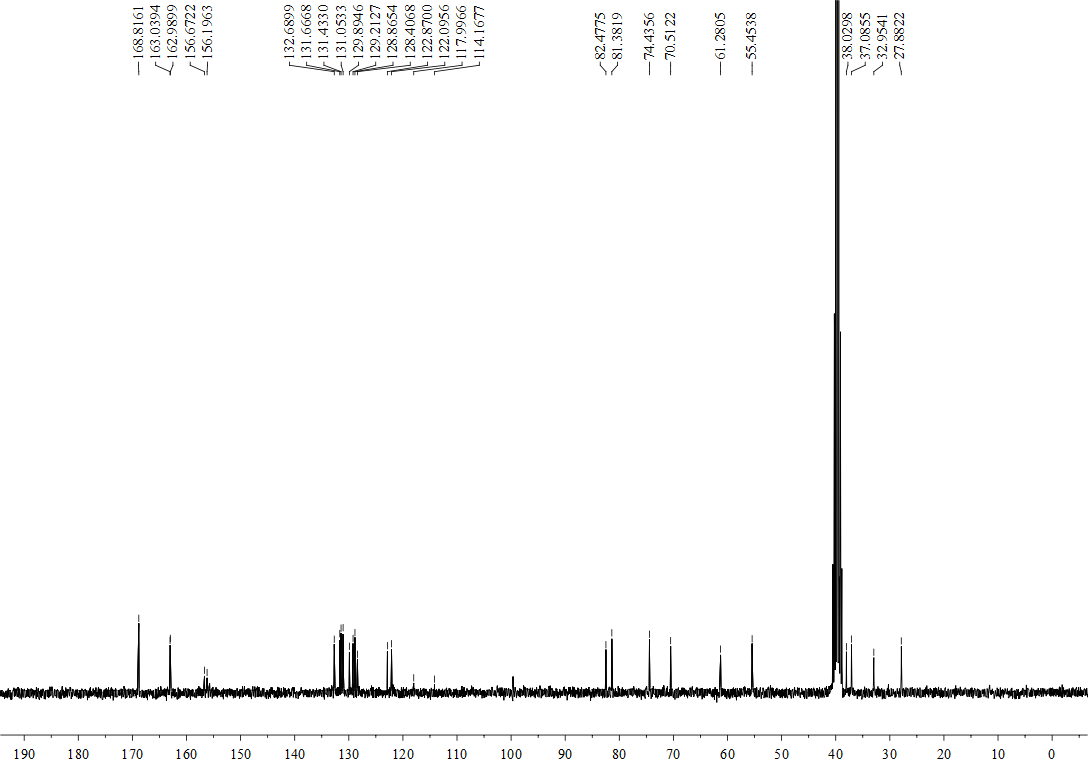


**1H NMR spectrum of 17a (300 MHz, DMSO-*d6*)**


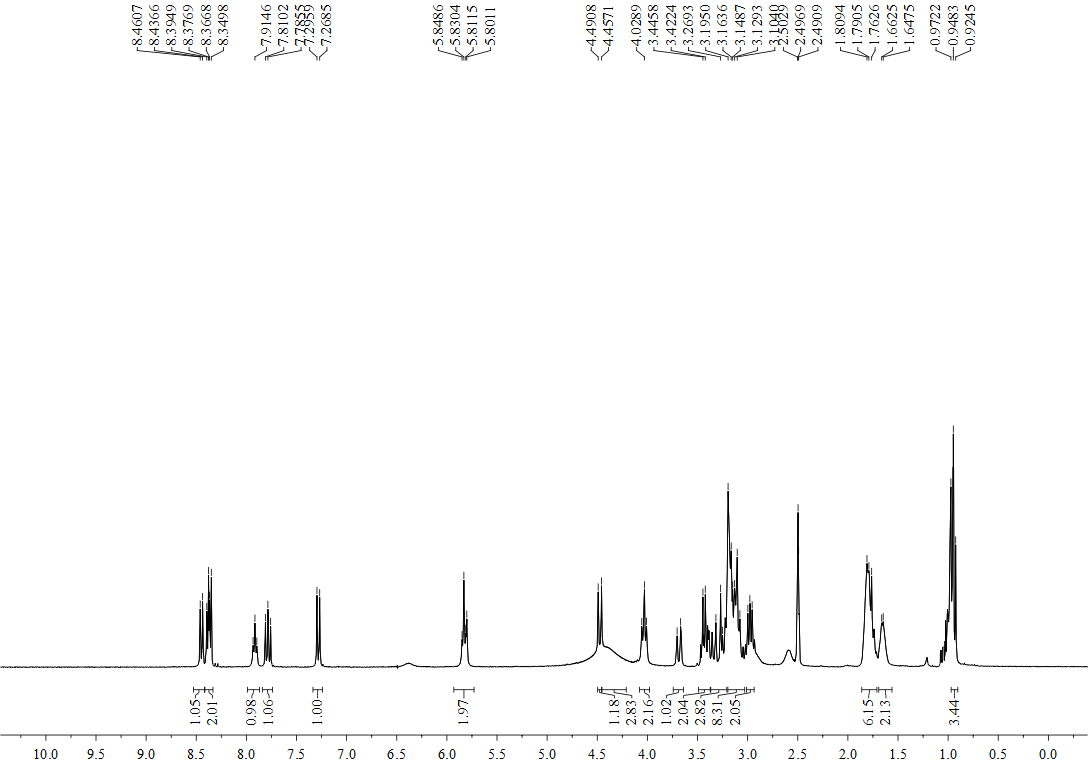


**13C NMR spectrum of 17a (300 MHz, DMSO-*d6*)**


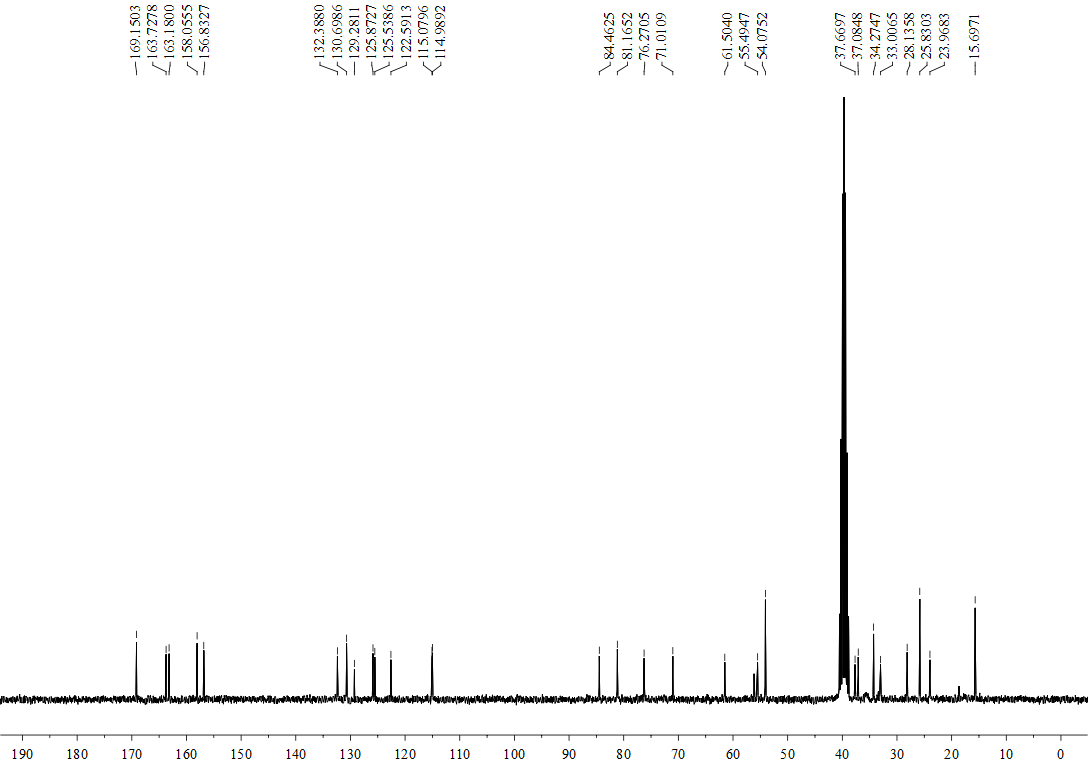


**1H NMR spectrum of 17b (300 MHz, DMSO-*d6*)**


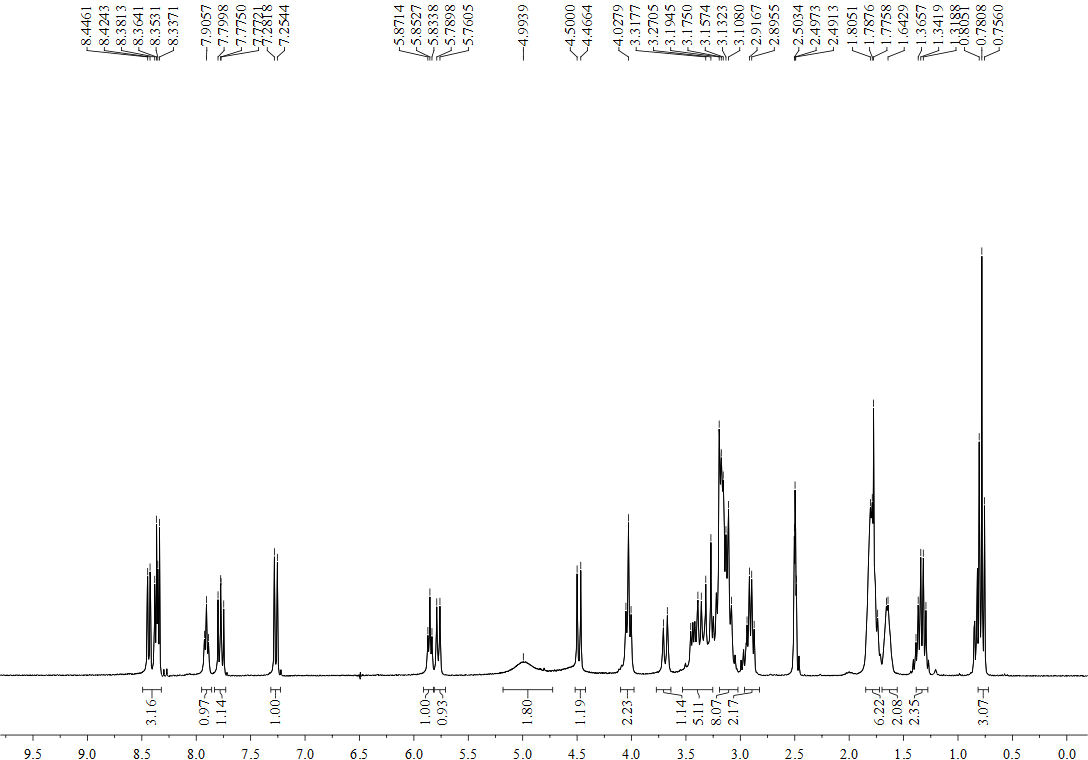


**13C NMR spectrum of 17b (300 MHz, DMSO-*d6*)**


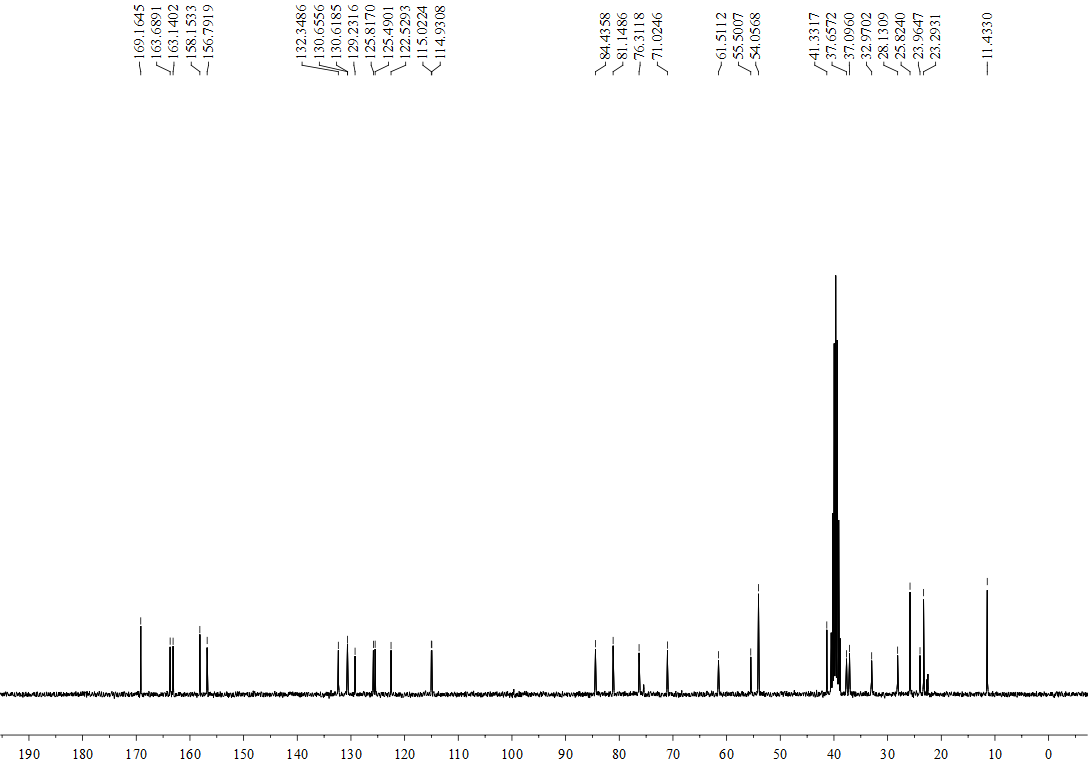


**1H NMR spectrum of 17c (300 MHz, DMSO-*d6*)**


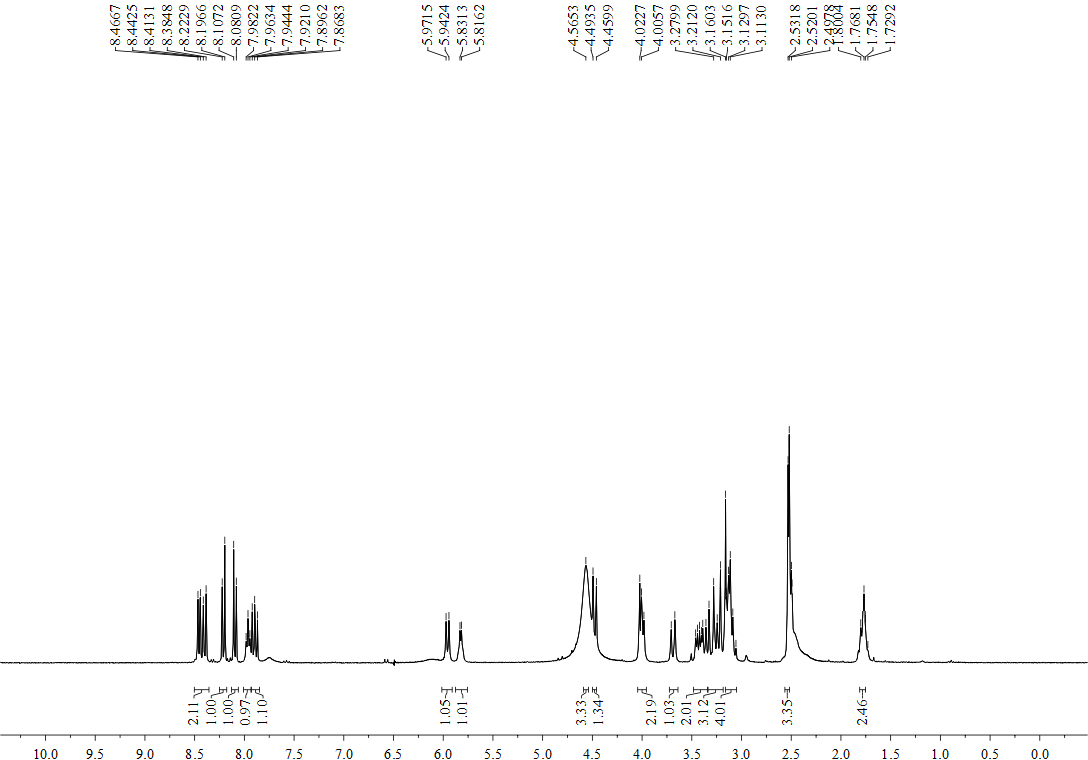


**13C NMR spectrum of 17c (300 MHz, DMSO-*d6*)**


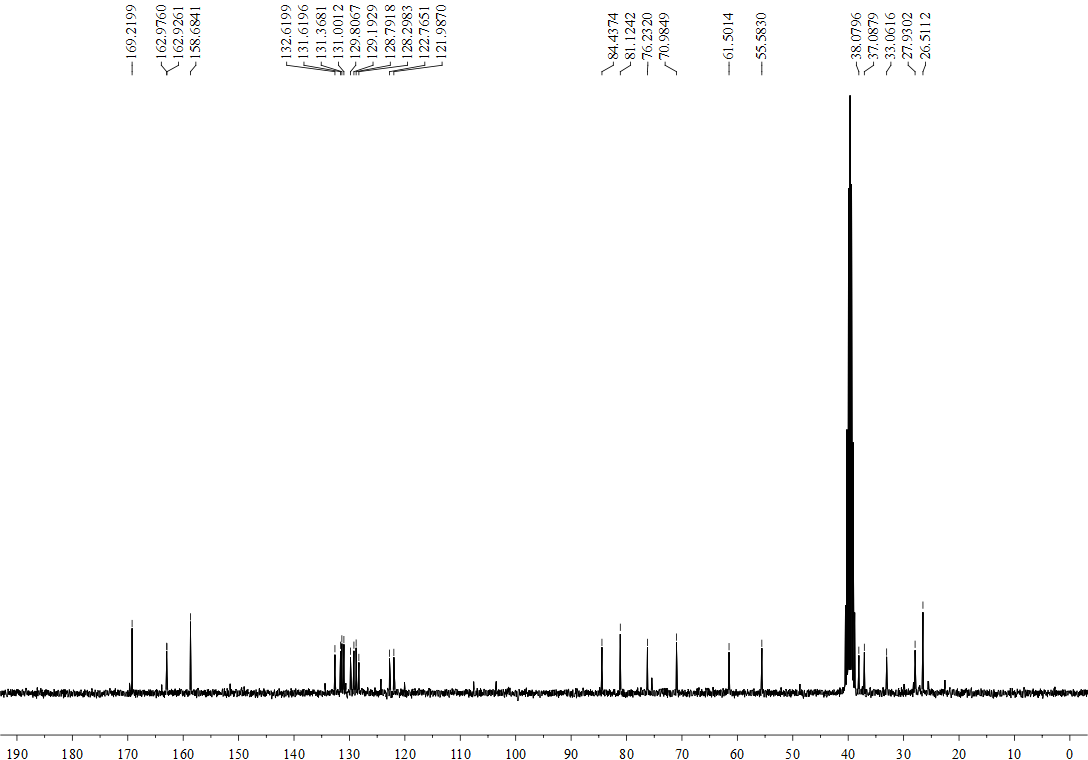


**1H NMR spectrum of 17d (300 MHz, DMSO-*d6*)**


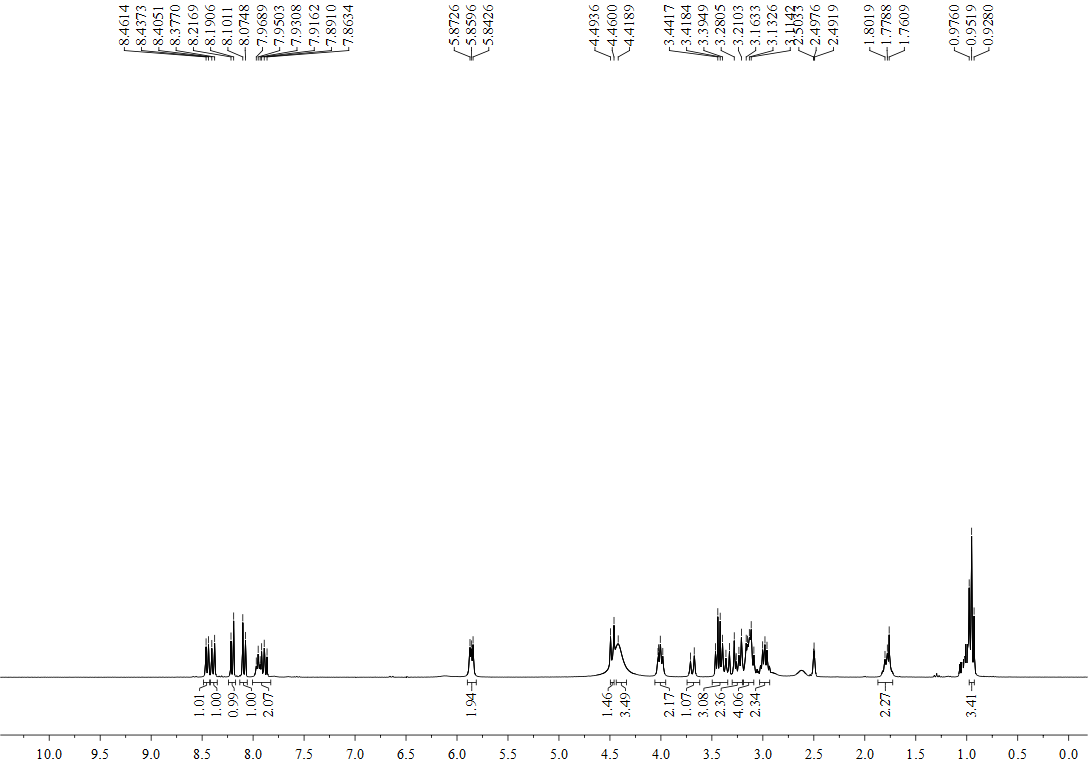


**13C NMR spectrum of 17d (300 MHz, DMSO-*d6*)**


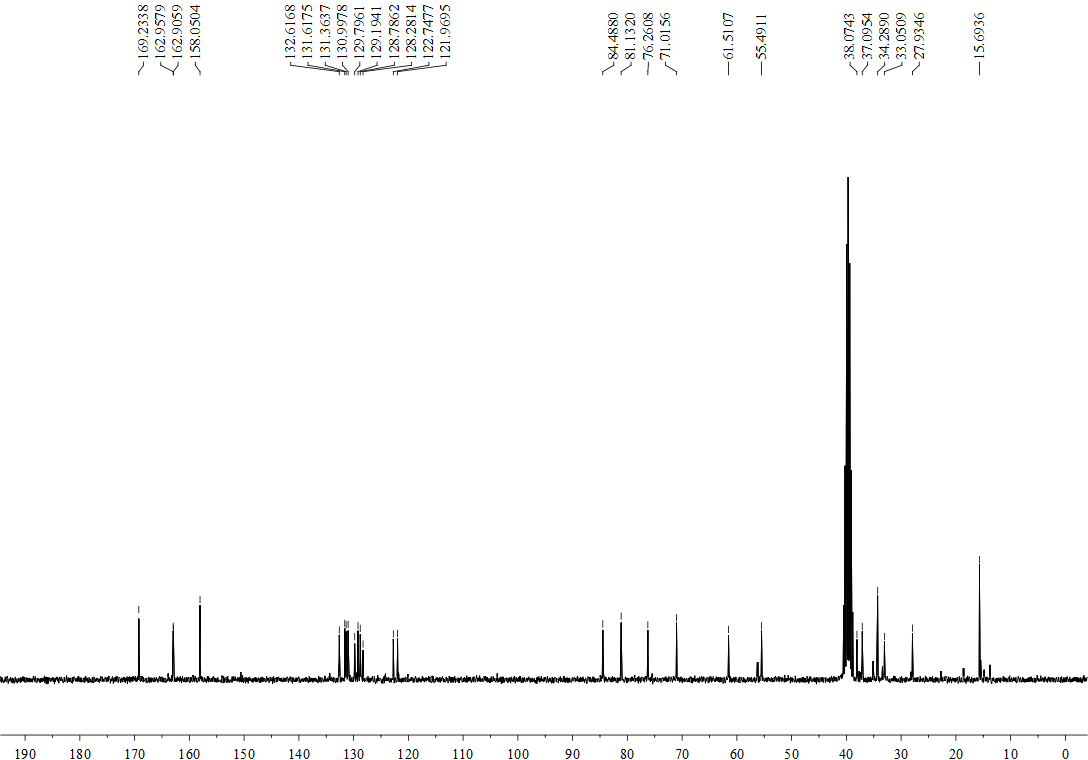

Supplement: Supplementary file 1 [file Table_1.docx]
